# Supplementary material for: ExpressionPlot: a web-based framework for analysis of RNA-Seq and microarray gene expression data
Source: Springer Nature journal article supplement (doi:10.1186/gb-2011-12-7-r69), 2011-07-01
Supplement: 13059_2010_9613_MOESM7_ESM.pdf [file 13059_2010_9613_MOESM7_ESM.pdf]

**(a)** (gene-level changes)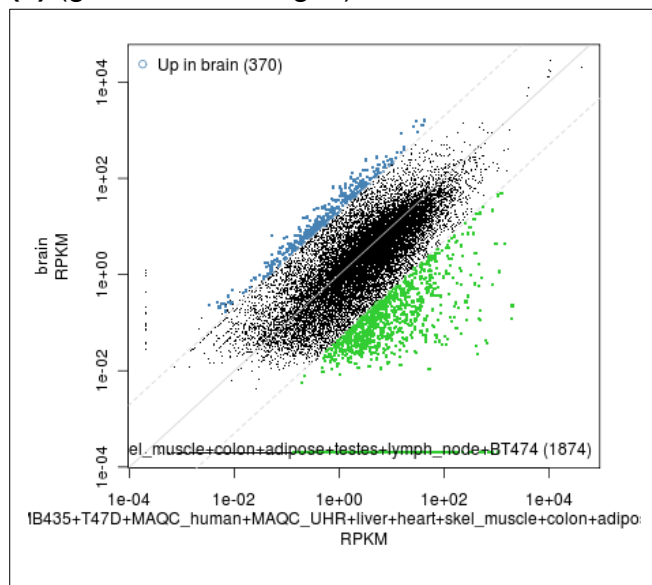**(b)** (cassette exon splicing changes)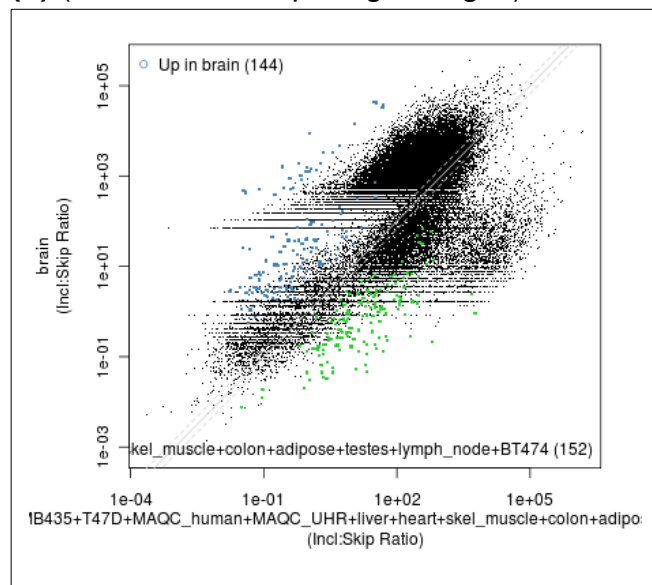**(c)****Human\_Tissues/brain Up skipped\_exons**

Platform=RNASeq P=1e-4 FC=1.5

Showing 144/144 Up skipped\_exons

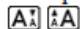Download:   Convert hg18 skipped\_exons to  Make Background controlling for  

| chr                  | strand | reg.exon            | gene                 | ID     | eup1                                                    | jup1                                                    | js                                                      |
|----------------------|--------|---------------------|----------------------|--------|---------------------------------------------------------|---------------------------------------------------------|---------------------------------------------------------|
| <input type="text"/> |        |                     | <input type="text"/> |        | <input type="button" value="All"/> <input type="text"/> | <input type="button" value="All"/> <input type="text"/> | <input type="button" value="All"/> <input type="text"/> |
| chr9                 | 1      | 123102155,123102225 | GSN                  | 170434 | 0                                                       | 9                                                       | 1617                                                    |
| chr9                 | 1      | 36199264,36199317   | CLTA                 |        |                                                         | 12                                                      | 489                                                     |
| chr6                 | 1      | 33518208,33518249   | SYNGAP1              |        |                                                         | 12                                                      | 184                                                     |
| chr9                 | 1      | 123102164,123102225 | GSN                  |        |                                                         | 2                                                       | 1617                                                    |
| chr9                 | 1      | 123102201,123102225 | GSN                  |        |                                                         | 0                                                       | 1617                                                    |
| chr17                | 1      | 37914116,37914133   | ATP6V0A3             |        |                                                         | 2                                                       | 226                                                     |
| chr11                | 1      | 118031780,118031812 | PHLDB1               |        |                                                         | 2                                                       | 238                                                     |
| chr15                | -1     | 70282417 70282583   | PKM2                 | 190189 | 18511                                                   | 270                                                     | 544                                                     |

Open Readmap Browser

Human\_Tissues

- CLTA
- [chr9:36199264-36199317](#)
