# Supplementary material for: ExpressionPlot: a web-based framework for analysis of RNA-Seq and microarray gene expression data
Source: Springer Nature journal article supplement (doi:10.1186/gb-2011-12-7-r69), 2011-07-01

**(a)**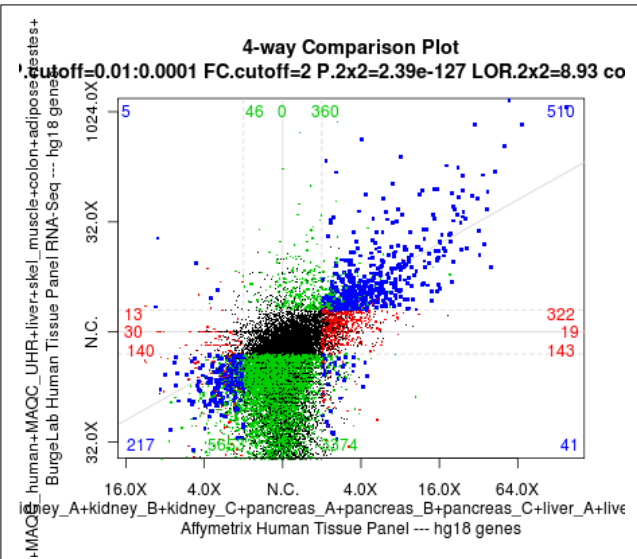**(b)**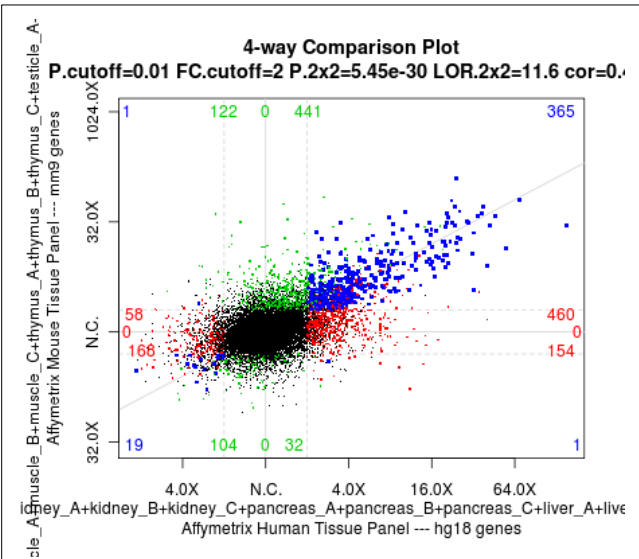

Supplement: 13059_2010_9613_MOESM8_ESM.pdf [file 13059_2010_9613_MOESM8_ESM.pdf]
