# Supplementary material for: ExpressionPlot: a web-based framework for analysis of RNA-Seq and microarray gene expression data
Source: Genome Biol. 2011 Jul 28;12(7):R69. doi: 10.1186/gb-2011-12-7-r69 (PMC3218831; doi:10.1186/gb-2011-12-7-r69)
Supplement: Additional file 2 — Data for Figure S7 in Additional file 1. [file gb-2011-12-7-r69-S2.ZIP]

Archive with 1 entries (1 files):
- ecdf.tsv
