# Supplementary material for: ExpressionPlot: a web-based framework for analysis of RNA-Seq and microarray gene expression data
Source: Genome Biol. 2011 Jul 28;12(7):R69. doi: 10.1186/gb-2011-12-7-r69 (PMC3218831; doi:10.1186/gb-2011-12-7-r69)
Supplement: Additional file 2 — Data for Figure S7 in Additional file 1. [file gb-2011-12-7-r69-S2.ZIP › ecdf.tsv]

d	A	B	C	D	E	F	G	H
-36	0.00116337	0.00208999	0.00200039	0.00216004	0.00316669	0.00268669	0.00275214	0.0023711
-35	0.00252618	0.00483652	0.00429593	0.00454163	0.00660691	0.00599992	0.0059112	0.00525029
-34	0.00426569	0.00747363	0.00666798	0.00732199	0.0109414	0.00955739	0.00938082	0.00814006
-33	0.00614924	0.0105484	0.00930238	0.0104568	0.0157072	0.0138476	0.0133323	0.0116967
-32	0.00834303	0.0138202	0.0122538	0.0137689	0.0209569	0.0180847	0.017316	0.0158355
-31	0.0110243	0.0171904	0.0159376	0.0177345	0.0269537	0.0232669	0.022242	0.0207154
-30	0.0139272	0.0211735	0.0199274	0.0224644	0.0336342	0.0292137	0.0276285	0.0262197
-29	0.0168966	0.0255832	0.0240922	0.0273495	0.0405462	0.0348526	0.033197	0.0314382
-28	0.0203534	0.03019	0.0283334	0.0325336	0.0475845	0.0401516	0.0386477	0.0368155
-27	0.0237549	0.0347639	0.0325201	0.0375958	0.0549068	0.046502	0.0443554	0.0426798
-26	0.0269237	0.0393049	0.0365318	0.0422593	0.0630813	0.0529585	0.0503737	0.0488086
-25	0.0308127	0.0444916	0.0416366	0.047388	0.0719185	0.059723	0.0570131	0.0551492
-24	0.0347903	0.049919	0.046501	0.0532921	0.081103	0.067369	0.0637917	0.0622096
-23	0.0392111	0.0550838	0.0522289	0.0592516	0.0907714	0.075429	0.0710522	0.069651
-22	0.0441416	0.0613538	0.0583721	0.0659533	0.101271	0.0841262	0.0791052	0.0778546
-21	0.0492937	0.0676894	0.0648215	0.0725774	0.112938	0.0932801	0.0868154	0.0868626
-20	0.0545787	0.0744408	0.0711287	0.0794231	0.125237	0.102508	0.0961534	0.0963682
-19	0.0607058	0.0818269	0.0778295	0.0872879	0.13904	0.112979	0.105577	0.106975
-18	0.0665337	0.0898477	0.0847052	0.0948646	0.151464	0.123832	0.11544	0.11775
-17	0.0726497	0.0972775	0.0919853	0.102574	0.165888	0.134557	0.126191	0.128939
-16	0.0787214	0.104915	0.0988938	0.110395	0.181017	0.146313	0.136707	0.141239
-15	0.0854689	0.112509	0.106436	0.118182	0.196934	0.158886	0.147919	0.154397
-14	0.0920946	0.120399	0.114711	0.126158	0.214356	0.171821	0.159271	0.168666
-13	0.0987092	0.128879	0.122767	0.134332	0.232389	0.185509	0.171618	0.18449
-12	0.106011	0.137939	0.131305	0.142762	0.251978	0.199856	0.184682	0.201639
-11	0.113523	0.14793	0.14029	0.151834	0.271778	0.214893	0.19825	0.219771
-10	0.121966	0.158161	0.149909	0.161538	0.292934	0.231692	0.21305	0.240053
-9	0.130297	0.168447	0.160163	0.171109	0.316595	0.248726	0.228995	0.261498
-8	0.138496	0.179914	0.17035	0.180203	0.341119	0.266991	0.247071	0.284775
-7	0.147338	0.190671	0.180352	0.189397	0.3662	0.287422	0.265051	0.309587
-6	0.156302	0.202269	0.191229	0.198768	0.39126	0.308024	0.28377	0.333848
-5	0.165431	0.214437	0.202324	0.207918	0.417855	0.329061	0.304802	0.360015
-4	0.175381	0.228367	0.213681	0.218508	0.446829	0.352115	0.325941	0.386605
-3	0.185574	0.242592	0.226285	0.229286	0.474519	0.375637	0.349907	0.415164
-2	0.197297	0.256883	0.239905	0.241105	0.503388	0.400678	0.375576	0.443469
-1	0.209108	0.273209	0.254017	0.253899	0.533245	0.427651	0.402433	0.473415
0	0.222292	0.291778	0.27025	0.269042	0.563765	0.454581	0.430511	0.503784
1	0.23622	0.311299	0.288111	0.285668	0.594191	0.48388	0.459992	0.533973
2	0.251554	0.332659	0.307842	0.303879	0.625636	0.514294	0.491219	0.565052
3	0.267664	0.355856	0.328218	0.323142	0.6546	0.543868	0.522745	0.595865
4	0.285247	0.380663	0.349905	0.344178	0.683447	0.57408	0.553158	0.624467
5	0.303728	0.406848	0.372915	0.367695	0.712568	0.603135	0.584031	0.652613
6	0.324181	0.435057	0.397237	0.392164	0.740858	0.630756	0.614101	0.680738
7	0.346551	0.463234	0.423165	0.417088	0.766475	0.65827	0.644782	0.707688
8	0.370816	0.493183	0.450482	0.443806	0.790904	0.685774	0.674873	0.734363
9	0.396421	0.523526	0.4784	0.472163	0.813744	0.712737	0.702898	0.759619
10	0.425151	0.554285	0.507597	0.500011	0.835721	0.739083	0.729905	0.784241
11	0.4548	0.58639	0.536947	0.529853	0.855195	0.763667	0.756227	0.807687
12	0.484804	0.617182	0.567784	0.560193	0.873732	0.787369	0.782378	0.829016
13	0.515196	0.647186	0.597025	0.590423	0.890418	0.809107	0.805369	0.848123
14	0.544457	0.676008	0.626703	0.620043	0.903874	0.829932	0.827279	0.865144
15	0.575181	0.704841	0.653735	0.648312	0.915972	0.848664	0.848129	0.880418
16	0.603967	0.730446	0.680309	0.675174	0.925967	0.865878	0.866088	0.893618
17	0.632652	0.755898	0.706904	0.701194	0.934604	0.881287	0.882697	0.905156
18	0.661204	0.780781	0.732778	0.725963	0.941358	0.894731	0.896854	0.915233
19	0.688383	0.80365	0.756706	0.74918	0.946556	0.906263	0.909169	0.92331
20	0.715451	0.825119	0.780656	0.772498	0.95088	0.916649	0.919856	0.93019
21	0.741676	0.844947	0.804016	0.795062	0.954299	0.925665	0.929205	0.935927
22	0.76737	0.863144	0.82602	0.816252	0.957518	0.933427	0.936776	0.940564
23	0.790239	0.879284	0.846024	0.836623	0.960001	0.939672	0.943437	0.944904
24	0.81211	0.893848	0.863766	0.853261	0.961895	0.94479	0.948534	0.948534
25	0.831754	0.906716	0.879747	0.868957	0.963799	0.949558	0.952668	0.951636
26	0.849172	0.917724	0.893214	0.882483	0.965345	0.953169	0.955634	0.95461
27	0.865814	0.927255	0.904812	0.892696	0.966608	0.955898	0.958611	0.956611
28	0.880206	0.934608	0.91465	0.902289	0.967818	0.958457	0.960945	0.95894
29	0.892704	0.941119	0.922979	0.910231	0.968933	0.96073	0.963055	0.960718
30	0.903706	0.946481	0.929057	0.916844	0.970227	0.962439	0.965036	0.962581
31	0.913102	0.950606	0.934752	0.922759	0.971268	0.964362	0.96646	0.96419
32	0.921954	0.954119	0.939354	0.927622	0.972331	0.96588	0.967735	0.965661
33	0.928647	0.956997	0.943278	0.931865	0.973194	0.967324	0.968806	0.967154
34	0.933821	0.958944	0.946416	0.935132	0.973867	0.968408	0.969726	0.968435
35	0.938419	0.960575	0.948908	0.938223	0.974793	0.969363	0.970605	0.969673
36	0.942064	0.962249	0.951269	0.941103	0.975519	0.970616	0.971386	0.970922
37	0.945399	0.963748	0.953127	0.943529	0.975992	0.971477	0.97205	0.97179
38	0.948479	0.964908	0.955139	0.945689	0.976402	0.972188	0.972843	0.972447
39	0.950773	0.966068	0.956603	0.947583	0.976781	0.97291	0.973346	0.973092
40	0.952512	0.967195	0.958134	0.949533	0.977118	0.973505	0.973796	0.973611
41	0.954595	0.968191	0.959675	0.951538	0.977665	0.974184	0.974288	0.974108
42	0.956368	0.968967	0.960998	0.953266	0.977896	0.974875	0.974685	0.974553
43	0.957908	0.969591	0.962156	0.955027	0.978149	0.975416	0.975049	0.974976
44	0.95926	0.970226	0.963173	0.956711	0.978391	0.975745	0.975284	0.975326
45	0.960678	0.97097	0.964157	0.957829	0.978507	0.976107	0.975541	0.975601
46	0.961819	0.971364	0.964824	0.959103	0.978685	0.976393	0.975766	0.975855
47	0.962717	0.97167	0.965742	0.960078	0.978864	0.976669	0.975905	0.97612
48	0.96357	0.972009	0.966365	0.960887	0.979075	0.976882	0.976087	0.976331
49	0.964213	0.972141	0.966922	0.961507	0.979201	0.977041	0.97627	0.976469
50	0.964822	0.972327	0.967392	0.962172	0.979264	0.977126	0.976355	0.976607
51	0.96552	0.972568	0.967863	0.962803	0.979317	0.977253	0.976452	0.976765
52	0.966041	0.972699	0.96818	0.963257	0.979411	0.97736	0.976569	0.976956
53	0.966406	0.972786	0.968529	0.963545	0.979485	0.977487	0.976666	0.977072
54	0.966805	0.972852	0.968737	0.963844	0.979559	0.977561	0.976719	0.977178
55	0.967038	0.972983	0.968956	0.964154	0.979622	0.977646	0.976784	0.977337
56	0.967215	0.973038	0.969131	0.964409	0.979706	0.977678	0.976816	0.977411
57	0.967536	0.973137	0.969229	0.964708	0.979727	0.977731	0.976901	0.977527
58	0.967813	0.973191	0.969382	0.964963	0.979811	0.977795	0.977008	0.977549
59	0.968002	0.973246	0.969513	0.965173	0.979885	0.977859	0.977083	0.977686
60	0.968157	0.973312	0.969655	0.965384	0.979927	0.977891	0.977148	0.977782
61	0.968312	0.973388	0.969775	0.965617	0.979969	0.977944	0.977201	0.977887
62	0.968456	0.973432	0.969852	0.965838	0.980032	0.977997	0.977244	0.977972
63	0.968578	0.973509	0.969972	0.966049	0.980043	0.978039	0.977276	0.978089
64	0.968722	0.973552	0.970103	0.96627	0.980095	0.978103	0.977308	0.978184
65	0.968899	0.973618	0.970333	0.966458	0.980137	0.978167	0.977373	0.978237
66	0.96901	0.973662	0.970508	0.966636	0.980221	0.978199	0.977415	0.9783
67	0.969132	0.973738	0.970584	0.96678	0.980232	0.97822	0.977458	0.978343
68	0.969287	0.973782	0.970694	0.966935	0.980337	0.978241	0.977469	0.978406
69	0.969431	0.973848	0.970814	0.967178	0.980379	0.978337	0.97749	0.97847
70	0.969553	0.973924	0.970934	0.967322	0.980453	0.978368	0.977576	0.978575
71	0.969653	0.973968	0.971033	0.967466	0.980505	0.978464	0.97763	0.978628
72	0.969808	0.974012	0.971109	0.967588	0.980558	0.978528	0.977672	0.978724
73	0.969896	0.974067	0.971251	0.967743	0.980653	0.978581	0.977715	0.978861
74	0.97004	0.97411	0.971382	0.967887	0.980674	0.978645	0.977737	0.978967
75	0.970162	0.974143	0.971524	0.968054	0.980747	0.978676	0.977844	0.97902
76	0.970284	0.974187	0.971623	0.968131	0.980821	0.97873	0.977876	0.979179
77	0.970439	0.97422	0.971677	0.968353	0.980884	0.978793	0.977908	0.979263
78	0.970495	0.974285	0.971765	0.968508	0.980958	0.978846	0.978058	0.979359
79	0.970617	0.974307	0.971852	0.968607	0.981031	0.97891	0.97809	0.979401
80	0.970783	0.974384	0.971962	0.968785	0.981074	0.978963	0.978176	0.979486
81	0.970949	0.97445	0.972049	0.968951	0.981158	0.979016	0.978336	0.979592
82	0.971082	0.974548	0.972158	0.969095	0.981242	0.979144	0.978379	0.979666
83	0.971182	0.974625	0.972355	0.969283	0.981326	0.979282	0.978433	0.979793
84	0.971304	0.974658	0.972519	0.969505	0.981421	0.979356	0.97855	0.97993
85	0.97137	0.9748	0.972628	0.969626	0.981526	0.97942	0.978668	0.980015
86	0.971459	0.974887	0.972738	0.969815	0.981642	0.979494	0.978733	0.980036
87	0.971581	0.974953	0.972836	0.969959	0.981747	0.979579	0.978861	0.98011
88	0.971669	0.975008	0.972967	0.970225	0.98181	0.979643	0.978957	0.980163
89	0.971758	0.975051	0.973066	0.970358	0.981894	0.97977	0.979054	0.980258
90	0.971902	0.975106	0.973175	0.970502	0.981968	0.979876	0.979139	0.980364
91	0.97199	0.975237	0.973295	0.970668	0.982031	0.979961	0.979247	0.980481
92	0.972157	0.975292	0.973416	0.970834	0.982083	0.980025	0.979343	0.980555
93	0.972334	0.975347	0.973536	0.970945	0.982157	0.98011	0.979461	0.980661
94	0.972412	0.975369	0.973623	0.971155	0.98222	0.980174	0.979536	0.980724
95	0.972556	0.975456	0.973776	0.971233	0.982315	0.980206	0.979621	0.980777
96	0.972611	0.975588	0.973875	0.971465	0.982389	0.980301	0.979761	0.980883
97	0.972688	0.975653	0.97405	0.971665	0.982536	0.980386	0.979868	0.980968
98	0.972799	0.97573	0.974192	0.971875	0.98262	0.980492	0.979943	0.981063
99	0.972866	0.975817	0.974377	0.971975	0.982683	0.980567	0.979996	0.981148
100	0.97301	0.975927	0.974487	0.972086	0.982799	0.980641	0.980071	0.981275
101	0.97311	0.976014	0.974629	0.97223	0.982862	0.980683	0.980189	0.981391
102	0.973287	0.976069	0.974771	0.972407	0.982957	0.980747	0.980253	0.981486
103	0.97342	0.9762	0.97488	0.972562	0.982999	0.980822	0.980317	0.981571
104	0.973564	0.976288	0.975022	0.972717	0.983051	0.980885	0.980371	0.981645
105	0.973652	0.976375	0.975132	0.972916	0.983188	0.98097	0.980414	0.98174
106	0.97383	0.976441	0.97523	0.97306	0.983241	0.981045	0.980467	0.981793
107	0.973896	0.976507	0.975361	0.973238	0.983314	0.981119	0.980532	0.981857
108	0.973918	0.976605	0.975482	0.973426	0.983367	0.981161	0.980574	0.981899
109	0.974085	0.976693	0.975525	0.973515	0.983399	0.981193	0.980682	0.982005
110	0.974206	0.976769	0.975635	0.973647	0.983462	0.981236	0.980756	0.982079
111	0.974373	0.976802	0.975733	0.973747	0.983472	0.981278	0.980831	0.982132
112	0.974517	0.976868	0.975886	0.973858	0.983504	0.981342	0.980885	0.982185
113	0.974694	0.976901	0.975984	0.973958	0.983535	0.981427	0.980917	0.982249
114	0.974805	0.977032	0.976126	0.974068	0.983577	0.981459	0.98096	0.982323
115	0.974893	0.977098	0.976203	0.97419	0.98363	0.981512	0.980992	0.982365
116	0.975004	0.977163	0.97629	0.974379	0.983683	0.981544	0.981035	0.982386
117	0.975037	0.977229	0.976345	0.974445	0.983735	0.981597	0.981067	0.982407
118	0.975082	0.977273	0.976454	0.974545	0.983798	0.981618	0.98111	0.982428
119	0.975226	0.977306	0.976487	0.974644	0.983819	0.981671	0.981185	0.982492
120	0.975325	0.977382	0.976564	0.974733	0.983861	0.981692	0.981238	0.982555
121	0.975392	0.977448	0.97664	0.974833	0.983904	0.981745	0.98127	0.982608
122	0.975447	0.977481	0.976695	0.974966	0.983935	0.981798	0.981367	0.982661
123	0.975525	0.977557	0.976804	0.975065	0.983988	0.981852	0.981399	0.982714
124	0.975602	0.97759	0.976903	0.975165	0.984019	0.981873	0.981474	0.982757
125	0.975691	0.977667	0.976968	0.975276	0.984051	0.981937	0.981517	0.982767
126	0.975746	0.977699	0.97711	0.975353	0.984103	0.981979	0.981549	0.982778
127	0.975813	0.977776	0.977176	0.975431	0.984156	0.982021	0.98157	0.98281
128	0.975857	0.977809	0.97722	0.97552	0.984188	0.982053	0.981613	0.982831
129	0.975913	0.977875	0.977296	0.97563	0.98423	0.982075	0.981656	0.982862
130	0.976001	0.977885	0.977373	0.975641	0.984251	0.982117	0.981688	0.982905
131	0.976057	0.977929	0.977416	0.975697	0.984282	0.98217	0.981752	0.982958
132	0.976101	0.978028	0.977471	0.975785	0.984314	0.982181	0.981752	0.982958
133	0.976212	0.978039	0.977504	0.975852	0.984324	0.982181	0.981774	0.982979
134	0.976267	0.978061	0.977547	0.975929	0.984335	0.982202	0.981795	0.983011
135	0.976345	0.978104	0.977569	0.975985	0.984387	0.982234	0.981827	0.983053
136	0.9764	0.978126	0.977635	0.976029	0.984419	0.982266	0.981881	0.983106
137	0.976445	0.978225	0.97769	0.976073	0.98444	0.982308	0.981913	0.983117
138	0.976522	0.978258	0.977701	0.976129	0.98444	0.982372	0.981934	0.983148
139	0.976555	0.978279	0.977777	0.976217	0.984472	0.982404	0.981945	0.983169
140	0.976622	0.97829	0.977821	0.976273	0.984535	0.982425	0.981977	0.983244
141	0.976655	0.978334	0.977886	0.976339	0.984545	0.982446	0.981999	0.983254
142	0.976677	0.978345	0.977941	0.976439	0.984556	0.982457	0.982031	0.983296
143	0.976733	0.978389	0.978007	0.976528	0.984629	0.982489	0.982063	0.98336
144	0.976755	0.978411	0.97805	0.976594	0.984661	0.982563	0.982084	0.983413
145	0.976821	0.978465	0.978116	0.97666	0.984693	0.982616	0.982138	0.983445
146	0.976832	0.978509	0.978214	0.976727	0.984745	0.982648	0.982159	0.983476
147	0.976921	0.978553	0.978313	0.97676	0.984756	0.982669	0.982191	0.983508
148	0.976954	0.978608	0.978335	0.976827	0.984777	0.98268	0.982224	0.983508
149	0.976987	0.978608	0.978367	0.976871	0.984787	0.982733	0.982245	0.983519
150	0.977054	0.97863	0.978389	0.976926	0.984798	0.982765	0.982277	0.98354
151	0.977131	0.978684	0.978433	0.976971	0.98484	0.982775	0.982299	0.983551
152	0.977165	0.978728	0.978466	0.977048	0.98484	0.982818	0.982309	0.983561
153	0.97722	0.978805	0.978477	0.97707	0.98485	0.982839	0.982309	0.983582
154	0.97722	0.978837	0.978509	0.977115	0.984861	0.98286	0.98232	0.983603
155	0.97722	0.978892	0.978542	0.977192	0.984882	0.982882	0.982352	0.983603
156	0.977253	0.978903	0.978619	0.977236	0.984914	0.982914	0.982363	0.983678
157	0.977264	0.978925	0.97863	0.977303	0.984924	0.982935	0.982363	0.983699
158	0.977287	0.978969	0.978673	0.977336	0.984924	0.982967	0.982363	0.983741
159	0.97732	0.979002	0.978706	0.977392	0.984945	0.982998	0.982373	0.983752
160	0.977375	0.979045	0.978739	0.97748	0.984966	0.98302	0.982416	0.983762
161	0.977408	0.979067	0.978772	0.977513	0.984977	0.98302	0.982459	0.983783
162	0.97742	0.979089	0.978783	0.977547	0.985008	0.983052	0.982481	0.983815
163	0.977475	0.9791	0.978805	0.977591	0.985019	0.983083	0.982481	0.983836
164	0.977519	0.979122	0.978837	0.977635	0.98504	0.983105	0.982491	0.983836
165	0.977564	0.979155	0.97887	0.977668	0.98505	0.983137	0.982513	0.983836
166	0.977608	0.979188	0.978914	0.977691	0.985061	0.983158	0.982523	0.983857
167	0.977641	0.97922	0.978979	0.977691	0.985082	0.983179	0.982523	0.983879
168	0.977674	0.979253	0.97899	0.977713	0.985124	0.983211	0.982545	0.98391
169	0.977685	0.979264	0.979012	0.977757	0.985166	0.983275	0.982566	0.983921
170	0.977719	0.979264	0.979012	0.977801	0.985198	0.983285	0.982588	0.983942
171	0.977763	0.979286	0.979034	0.977868	0.985219	0.983285	0.982598	0.983974
172	0.977774	0.979319	0.979089	0.977945	0.98524	0.983296	0.982641	0.984016
173	0.977818	0.97933	0.979143	0.977968	0.985271	0.983317	0.982641	0.984048
174	0.977885	0.979374	0.979165	0.978001	0.985282	0.983381	0.982673	0.984069
175	0.977929	0.979374	0.97922	0.978023	0.985303	0.983423	0.982695	0.98409
176	0.97794	0.979385	0.979253	0.978067	0.985334	0.983444	0.982705	0.984122
177	0.977974	0.979406	0.979264	0.978123	0.985345	0.983498	0.982738	0.984122
178	0.978018	0.979461	0.979296	0.978189	0.985355	0.983529	0.982759	0.984143
179	0.978029	0.979483	0.979296	0.978233	0.985397	0.983551	0.982791	0.984154
180	0.978073	0.979516	0.979307	0.9783	0.985419	0.983561	0.982845	0.984175
181	0.978118	0.97956	0.97934	0.978311	0.985429	0.983583	0.982898	0.984186
182	0.978151	0.979582	0.979351	0.978344	0.98544	0.983593	0.982909	0.984196
183	0.978206	0.979603	0.979362	0.978377	0.985492	0.983625	0.98292	0.984228
184	0.978239	0.979614	0.979384	0.978411	0.985503	0.983678	0.982962	0.984249
185	0.978273	0.979636	0.979406	0.978444	0.985524	0.98371	0.982973	0.98427
186	0.978284	0.979658	0.979439	0.978488	0.985524	0.98371	0.982995	0.984281
187	0.978339	0.979713	0.979471	0.978499	0.985524	0.983742	0.983005	0.984323
188	0.97835	0.979746	0.979526	0.97851	0.985534	0.983774	0.983048	0.984344
189	0.978383	0.979768	0.979559	0.978544	0.985566	0.983795	0.98308	0.984366
190	0.978417	0.979811	0.979603	0.978599	0.985608	0.983827	0.983112	0.984397
191	0.97845	0.979822	0.979657	0.978643	0.985608	0.983837	0.983123	0.984408
192	0.978528	0.979833	0.979668	0.978665	0.985629	0.983869	0.983145	0.98444
193	0.97855	0.979866	0.979712	0.978743	0.985629	0.983869	0.983166	0.98445
194	0.97855	0.979899	0.979745	0.978754	0.985639	0.983901	0.983187	0.984471
195	0.978583	0.979932	0.979767	0.978776	0.985703	0.983901	0.983252	0.984503
196	0.978616	0.979997	0.979788	0.978776	0.985713	0.983912	0.983262	0.984503
197	0.978649	0.980019	0.97981	0.978809	0.985745	0.983944	0.983294	0.984503
198	0.978716	0.98003	0.979832	0.978865	0.985755	0.983975	0.983294	0.984514
199	0.978727	0.980041	0.979865	0.978909	0.985776	0.983986	0.983337	0.984514
200	0.978793	0.980063	0.979887	0.978965	0.985787	0.983986	0.983359	0.984535
201	0.978849	0.980085	0.979898	0.978976	0.985797	0.983997	0.983369	0.984567
202	0.978893	0.980107	0.979909	0.97902	0.985818	0.984018	0.983423	0.984577
203	0.978926	0.980151	0.97992	0.979064	0.985829	0.98405	0.983444	0.984598
204	0.978949	0.980162	0.979974	0.979086	0.98586	0.984071	0.983455	0.98463
205	0.978949	0.980172	0.98004	0.97912	0.985871	0.984071	0.983487	0.984662
206	0.978982	0.980183	0.980062	0.979153	0.985871	0.984092	0.983519	0.984683
207	0.979048	0.980205	0.980116	0.979208	0.985913	0.984103	0.983541	0.984683
208	0.979048	0.980205	0.980149	0.979275	0.985945	0.984103	0.983562	0.984704
209	0.979048	0.980249	0.980182	0.979286	0.985955	0.984103	0.983562	0.984715
210	0.979104	0.98026	0.980193	0.979352	0.985966	0.984103	0.983573	0.984736
211	0.979115	0.980282	0.980226	0.979363	0.985987	0.984113	0.983584	0.984789
212	0.979148	0.980304	0.980247	0.979408	0.985997	0.984113	0.983605	0.984789
213	0.979214	0.980326	0.980247	0.979474	0.986008	0.984177	0.983605	0.984821
214	0.979237	0.980358	0.98028	0.979507	0.986039	0.984252	0.983626	0.984842
215	0.97927	0.980369	0.980313	0.979529	0.986039	0.984294	0.983637	0.984874
216	0.97927	0.98038	0.980335	0.979529	0.98606	0.984337	0.983659	0.984884
217	0.979303	0.980402	0.980335	0.979563	0.98606	0.984358	0.983669	0.984884
218	0.979358	0.980424	0.980368	0.97964	0.986081	0.984379	0.983701	0.984895
219	0.97937	0.980435	0.980368	0.979696	0.986113	0.98439	0.983733	0.984895
220	0.979403	0.980446	0.980433	0.979718	0.986113	0.98439	0.983733	0.984927
221	0.979414	0.980457	0.980444	0.979762	0.986144	0.984411	0.983733	0.984958
222	0.979436	0.980468	0.980499	0.979773	0.986155	0.984432	0.983755	0.98499
223	0.979458	0.980468	0.980532	0.979784	0.986165	0.984464	0.983776	0.985022
224	0.979458	0.98049	0.980554	0.979795	0.986176	0.984485	0.983787	0.985043
225	0.97948	0.980523	0.980575	0.979817	0.986197	0.984496	0.983808	0.985043
226	0.979514	0.980544	0.980586	0.979873	0.986197	0.984496	0.98383	0.985043
227	0.97958	0.980566	0.980608	0.979906	0.986239	0.984517	0.983873	0.985096
228	0.979624	0.980577	0.98063	0.979906	0.98625	0.984528	0.983905	0.985128
229	0.979647	0.980599	0.980641	0.979973	0.98626	0.98457	0.983926	0.985138
230	0.979669	0.980665	0.980663	0.980028	0.986281	0.984602	0.98398	0.98517
231	0.979691	0.980698	0.980663	0.980083	0.986334	0.984602	0.984001	0.985181
232	0.979757	0.980709	0.980685	0.980105	0.986344	0.984602	0.984044	0.985181
233	0.979768	0.98072	0.980718	0.980128	0.986355	0.984655	0.984065	0.985202
234	0.979791	0.980731	0.980739	0.980139	0.986355	0.984655	0.984098	0.985212
235	0.979813	0.980807	0.98075	0.980172	0.986365	0.984676	0.98414	0.985234
236	0.979857	0.980862	0.980794	0.980216	0.986428	0.984708	0.984151	0.985234
237	0.979901	0.980862	0.980849	0.980238	0.986439	0.984719	0.984151	0.985234
238	0.979924	0.980873	0.98086	0.980249	0.98646	0.98474	0.984151	0.985265
239	0.979935	0.980884	0.980903	0.980249	0.986481	0.984793	0.984205	0.985318
240	0.97999	0.980895	0.980914	0.980272	0.986523	0.984825	0.984258	0.98535
241	0.980012	0.980938	0.980936	0.980316	0.986544	0.984836	0.984269	0.985371
242	0.980045	0.980982	0.980947	0.980382	0.986544	0.984846	0.98428	0.985382
243	0.980068	0.981004	0.981013	0.980416	0.986565	0.984846	0.98428	0.985382
244	0.980112	0.981026	0.981024	0.980416	0.986607	0.984857	0.98429	0.985403
245	0.980134	0.98107	0.981045	0.980427	0.986628	0.984857	0.984301	0.985403
246	0.980145	0.981103	0.981067	0.980438	0.98666	0.984878	0.984301	0.985456
247	0.980178	0.981124	0.981089	0.980471	0.986691	0.984889	0.984333	0.985456
248	0.980223	0.981157	0.981111	0.980493	0.986702	0.98491	0.984376	0.985498
249	0.980245	0.98119	0.981122	0.980515	0.986723	0.984921	0.984387	0.985509
250	0.9803	0.981201	0.981166	0.980537	0.986734	0.984942	0.984397	0.98553
251	0.980311	0.981223	0.981188	0.98056	0.986744	0.984952	0.984408	0.985541
252	0.980345	0.981278	0.981209	0.980582	0.986755	0.984984	0.984408	0.985551
253	0.980389	0.98131	0.981253	0.980626	0.986755	0.985006	0.984408	0.985583
254	0.980411	0.981332	0.981297	0.980648	0.986765	0.985016	0.98443	0.985593
255	0.980455	0.981354	0.981308	0.980648	0.986776	0.985037	0.98443	0.985593
256	0.9805	0.981387	0.981352	0.980693	0.986797	0.985048	0.98444	0.985604
257	0.980533	0.981409	0.981362	0.980737	0.986797	0.985048	0.984451	0.985615
258	0.980544	0.981431	0.981406	0.98077	0.986797	0.985059	0.984462	0.985615
259	0.980555	0.981453	0.981417	0.980781	0.986818	0.985069	0.984472	0.985615
260	0.980588	0.981475	0.981428	0.980814	0.986828	0.98508	0.984494	0.985646
261	0.98061	0.981507	0.981428	0.980825	0.986849	0.98508	0.984494	0.985646
262	0.980644	0.981562	0.98145	0.980848	0.98686	0.98509	0.984505	0.985668
263	0.980644	0.981584	0.981472	0.980859	0.98687	0.985112	0.984515	0.985689
264	0.980666	0.981639	0.981494	0.980881	0.986891	0.985122	0.984547	0.985699
265	0.980688	0.981639	0.981505	0.980892	0.986912	0.985122	0.984558	0.98572
266	0.98071	0.981639	0.981526	0.980903	0.986923	0.985122	0.984579	0.985731
267	0.98071	0.981672	0.981537	0.980936	0.986955	0.985133	0.984579	0.985752
268	0.980732	0.981693	0.981559	0.980947	0.986965	0.985133	0.984601	0.985763
269	0.980732	0.981704	0.981603	0.980958	0.986997	0.985144	0.984612	0.985773
270	0.980732	0.981737	0.981625	0.981014	0.987007	0.985165	0.984644	0.985773
271	0.980743	0.981748	0.981669	0.981036	0.987028	0.985186	0.984654	0.985826
272	0.980743	0.981781	0.98169	0.981058	0.987028	0.985197	0.984676	0.985848
273	0.980788	0.981792	0.981712	0.981102	0.987039	0.985229	0.984687	0.985848
274	0.980832	0.981814	0.981734	0.981136	0.987049	0.985229	0.984687	0.985858
275	0.980843	0.981836	0.981734	0.981147	0.987049	0.985229	0.984697	0.985869
276	0.980854	0.981847	0.981756	0.981147	0.987081	0.98525	0.984708	0.985879
277	0.980854	0.981847	0.981789	0.98118	0.987102	0.985271	0.984751	0.9859
278	0.980865	0.981869	0.9818	0.981202	0.987123	0.985282	0.984751	0.985911
279	0.980876	0.981869	0.9818	0.981213	0.987144	0.985292	0.984762	0.985922
280	0.980921	0.981879	0.981843	0.981224	0.987144	0.985313	0.984772	0.985943
281	0.980943	0.98189	0.981865	0.981224	0.987165	0.985335	0.984783	0.985953
282	0.980965	0.981901	0.981865	0.98128	0.987165	0.985345	0.984804	0.985985
283	0.980976	0.981912	0.981876	0.981291	0.987165	0.985367	0.984836	0.985985
284	0.980987	0.981934	0.981909	0.981324	0.987175	0.985367	0.984836	0.985985
285	0.98102	0.981945	0.981942	0.981335	0.987196	0.985398	0.984847	0.985985
286	0.981043	0.981945	0.981964	0.981346	0.987196	0.985441	0.984858	0.985996
287	0.981054	0.981978	0.981996	0.981379	0.987196	0.985441	0.984858	0.986006
288	0.981065	0.981978	0.982018	0.981401	0.987207	0.985473	0.984901	0.986049
289	0.981087	0.981989	0.982018	0.981424	0.987207	0.985483	0.984911	0.986091
290	0.981109	0.982011	0.982018	0.981446	0.987207	0.985483	0.984922	0.986102
291	0.981109	0.982033	0.98204	0.981468	0.987207	0.985505	0.984944	0.986123
292	0.981164	0.982055	0.982051	0.981501	0.987239	0.985526	0.984944	0.986123
293	0.981187	0.982076	0.982062	0.981523	0.987249	0.985536	0.984965	0.986133
294	0.981209	0.982098	0.982095	0.981523	0.98726	0.985547	0.984986	0.986144
295	0.981209	0.982109	0.982149	0.981545	0.987291	0.985558	0.984986	0.986165
296	0.981242	0.982131	0.982149	0.981601	0.987302	0.985579	0.985008	0.986165
297	0.981264	0.982153	0.982171	0.981612	0.987302	0.98559	0.985008	0.986186
298	0.98132	0.982153	0.982193	0.981623	0.987312	0.985632	0.985019	0.986186
299	0.981342	0.982164	0.982226	0.981645	0.987333	0.985643	0.985051	0.986207
300	0.981353	0.982175	0.982237	0.981667	0.987344	0.985643	0.985072	0.986207
301	0.981364	0.982186	0.982248	0.981689	0.987354	0.985653	0.985093	0.986218
302	0.981375	0.982197	0.982248	0.981712	0.987365	0.985653	0.985115	0.986218
303	0.981408	0.98223	0.98227	0.981723	0.987375	0.985675	0.985126	0.986218
304	0.981419	0.98223	0.98227	0.981745	0.987386	0.985696	0.985147	0.98625
305	0.98143	0.982241	0.98227	0.981778	0.987396	0.985696	0.985168	0.98626
306	0.981441	0.982251	0.982281	0.981789	0.987417	0.985696	0.98519	0.986271
307	0.981453	0.982251	0.982313	0.981822	0.987428	0.985738	0.98519	0.986282
308	0.981475	0.982295	0.982335	0.981822	0.987438	0.985749	0.985222	0.986292
309	0.981497	0.982306	0.982335	0.981867	0.987438	0.985759	0.985222	0.986292
310	0.981519	0.982317	0.982357	0.9819	0.987438	0.985759	0.985233	0.986292
311	0.981541	0.982328	0.982379	0.981922	0.987438	0.98577	0.985233	0.986303
312	0.981552	0.98235	0.98239	0.981933	0.98747	0.985791	0.985254	0.986313
313	0.981574	0.982361	0.982423	0.981933	0.987491	0.985802	0.985265	0.986313
314	0.981619	0.982394	0.982466	0.981955	0.987502	0.985813	0.985276	0.986334
315	0.98163	0.982427	0.982466	0.981977	0.987523	0.985855	0.985286	0.986345
316	0.981674	0.982427	0.982477	0.982	0.987554	0.985887	0.985297	0.986366
317	0.981696	0.98247	0.982488	0.982	0.987607	0.985898	0.985297	0.986387
318	0.981718	0.982492	0.982488	0.982	0.987617	0.985908	0.985297	0.986387
319	0.981741	0.982492	0.982521	0.982033	0.987617	0.985929	0.98534	0.986409
320	0.981741	0.982525	0.982532	0.982044	0.987638	0.985961	0.98535	0.98644
321	0.981741	0.982547	0.982554	0.982055	0.987649	0.985993	0.985361	0.986451
322	0.981763	0.982569	0.982609	0.982077	0.987649	0.986004	0.985372	0.986461
323	0.981774	0.98258	0.982641	0.982077	0.98767	0.986014	0.985393	0.986461
324	0.981774	0.982591	0.982652	0.982088	0.987691	0.986014	0.985393	0.986472
325	0.981785	0.982591	0.982674	0.982088	0.987701	0.986046	0.985393	0.986483
326	0.981818	0.982591	0.982707	0.982088	0.987712	0.986057	0.985393	0.986483
327	0.981829	0.982591	0.982729	0.98211	0.987733	0.986067	0.985415	0.986483
328	0.981851	0.982602	0.982729	0.982166	0.987754	0.986067	0.985436	0.986493
329	0.981874	0.982613	0.98274	0.982166	0.987765	0.986078	0.985447	0.986504
330	0.981885	0.982645	0.98274	0.982166	0.987775	0.986089	0.98549	0.986504
331	0.981907	0.982667	0.982783	0.982188	0.987796	0.986121	0.98549	0.986514
332	0.981907	0.982678	0.982794	0.98221	0.987796	0.986131	0.985511	0.986525
333	0.981951	0.9827	0.982794	0.982243	0.987796	0.986131	0.985511	0.986536
334	0.981962	0.982722	0.982794	0.982254	0.987807	0.986131	0.985511	0.986536
335	0.981973	0.982744	0.982794	0.982288	0.987807	0.986131	0.985511	0.986536
336	0.981995	0.982744	0.982794	0.982332	0.987817	0.986142	0.985522	0.986557
337	0.982007	0.982744	0.982805	0.982354	0.987817	0.986142	0.985554	0.986557
338	0.98204	0.982755	0.982827	0.982376	0.987817	0.986174	0.985565	0.986557
339	0.982051	0.982766	0.982827	0.982398	0.987817	0.986184	0.985565	0.986557
340	0.982051	0.982788	0.982838	0.982409	0.987817	0.986206	0.985565	0.986588
341	0.982073	0.982788	0.98286	0.982432	0.987828	0.986216	0.985575	0.986588
342	0.982095	0.98281	0.982871	0.982432	0.987838	0.986227	0.985586	0.986599
343	0.982117	0.982821	0.982871	0.982432	0.987849	0.986237	0.985597	0.98662
344	0.982173	0.982853	0.982893	0.982443	0.987859	0.986269	0.985618	0.98662
345	0.982173	0.982864	0.982937	0.982443	0.98787	0.98628	0.985618	0.986631
346	0.982173	0.982875	0.982947	0.982443	0.98787	0.986301	0.985629	0.986652
347	0.982184	0.982908	0.982969	0.982465	0.98787	0.986312	0.985629	0.986663
348	0.982184	0.98293	0.983002	0.982476	0.98788	0.986344	0.985629	0.986663
349	0.982195	0.982941	0.983013	0.982487	0.987901	0.986365	0.98564	0.986684
350	0.982228	0.982941	0.983013	0.982487	0.987901	0.986386	0.98564	0.986694
351	0.982239	0.982985	0.983024	0.982498	0.987912	0.986386	0.98564	0.986705
352	0.98225	0.982996	0.983046	0.982531	0.987912	0.986386	0.98564	0.986715
353	0.982261	0.982996	0.983057	0.982531	0.987912	0.986386	0.98564	0.986715
354	0.982284	0.982996	0.983079	0.982565	0.987922	0.986386	0.98565	0.986726
355	0.982295	0.983039	0.983101	0.982598	0.987922	0.986386	0.985661	0.986726
356	0.982306	0.983039	0.983133	0.982609	0.987922	0.986386	0.985661	0.986726
357	0.982306	0.983061	0.983155	0.98262	0.987922	0.986397	0.985682	0.986726
358	0.982317	0.983061	0.983177	0.982642	0.987922	0.986397	0.985693	0.986726
359	0.982339	0.983083	0.983199	0.982653	0.987954	0.986418	0.985704	0.986737
360	0.98235	0.983094	0.98321	0.982664	0.987975	0.986439	0.985725	0.986737
361	0.98235	0.983094	0.98321	0.982698	0.988007	0.986439	0.985757	0.986747
362	0.98235	0.983116	0.983232	0.982709	0.988038	0.98645	0.985779	0.986768
363	0.982372	0.983127	0.983254	0.98272	0.988059	0.98646	0.98579	0.986768
364	0.982394	0.983138	0.983275	0.982731	0.98807	0.986471	0.985811	0.98679
365	0.982394	0.983149	0.983297	0.982753	0.988101	0.986503	0.985843	0.9868
366	0.982416	0.983149	0.983308	0.982764	0.988133	0.986503	0.985886	0.986843
367	0.982439	0.98316	0.983319	0.982764	0.988133	0.986503	0.985886	0.986843
368	0.98245	0.983171	0.983341	0.982775	0.988133	0.986513	0.985897	0.986864
369	0.982483	0.983182	0.983341	0.982786	0.988133	0.986524	0.985897	0.986874
370	0.982494	0.983182	0.983363	0.982786	0.988143	0.986535	0.985929	0.986906
371	0.982505	0.983193	0.983374	0.982797	0.988143	0.986535	0.985929	0.986906
372	0.982505	0.983203	0.983385	0.982797	0.988154	0.986535	0.985939	0.986906
373	0.982516	0.983214	0.983385	0.982808	0.988154	0.986545	0.98595	0.986927
374	0.982516	0.983236	0.983396	0.982808	0.988154	0.986556	0.98595	0.986927
375	0.982516	0.983236	0.983407	0.982808	0.988175	0.986567	0.985961	0.986938
376	0.982516	0.983258	0.983407	0.98283	0.988185	0.986567	0.985972	0.986938
377	0.982516	0.983269	0.983439	0.982853	0.988196	0.986567	0.985993	0.986948
378	0.982527	0.983313	0.983439	0.982875	0.988196	0.986567	0.986004	0.986948
379	0.982538	0.983324	0.983461	0.982886	0.988206	0.986567	0.986004	0.986948
380	0.982549	0.983324	0.983472	0.982897	0.988217	0.986577	0.986004	0.986959
381	0.982561	0.983324	0.983472	0.982908	0.988227	0.986588	0.986004	0.986959
382	0.982561	0.983324	0.983538	0.98293	0.988238	0.986588	0.986004	0.986959
383	0.982572	0.983335	0.983549	0.982963	0.98827	0.986588	0.986004	0.98697
384	0.982572	0.983368	0.98356	0.982963	0.98828	0.986598	0.986014	0.98697
385	0.982583	0.983368	0.98356	0.982974	0.988312	0.986598	0.986025	0.98697
386	0.982594	0.983368	0.98356	0.982997	0.988322	0.986598	0.986036	0.98697
387	0.982605	0.983368	0.98356	0.983008	0.988343	0.986598	0.986057	0.98697
388	0.982605	0.983379	0.983592	0.983008	0.988354	0.986598	0.986089	0.98698
389	0.982616	0.9834	0.983614	0.98303	0.988385	0.986609	0.986089	0.98698
390	0.982638	0.9834	0.983614	0.983041	0.988396	0.98662	0.9861	0.98698
391	0.982638	0.9834	0.983614	0.983052	0.988396	0.98663	0.986111	0.987001
392	0.982638	0.9834	0.983625	0.983063	0.988396	0.986641	0.986122	0.987012
393	0.982649	0.983433	0.983636	0.983074	0.988406	0.986652	0.986143	0.987012
394	0.982693	0.983433	0.983658	0.983096	0.988406	0.986673	0.986143	0.987022
395	0.982693	0.983455	0.98368	0.98313	0.988417	0.986673	0.986154	0.987022
396	0.982716	0.983455	0.983691	0.98313	0.988438	0.986683	0.986164	0.987022
397	0.982738	0.983455	0.983702	0.983141	0.988459	0.986683	0.986175	0.987022
398	0.982738	0.983466	0.983713	0.983141	0.988459	0.986694	0.986186	0.987022
399	0.982738	0.983477	0.983724	0.983152	0.988459	0.986705	0.986186	0.987022
400	0.982749	0.983488	0.983735	0.983163	0.988469	0.986705	0.986196	0.987022
401	0.982749	0.983499	0.983767	0.983174	0.988469	0.986715	0.986207	0.987022
402	0.98276	0.983499	0.983778	0.983185	0.988469	0.986715	0.986207	0.987044
403	0.98276	0.983499	0.9838	0.983196	0.98848	0.986736	0.986207	0.987054
404	0.982771	0.983532	0.983811	0.983207	0.98848	0.986758	0.986207	0.987075
405	0.982771	0.983543	0.983822	0.983229	0.988491	0.986779	0.986207	0.987075
406	0.982771	0.983565	0.983844	0.98324	0.988491	0.9868	0.986229	0.987097
407	0.982826	0.983565	0.983844	0.983262	0.988512	0.986811	0.986261	0.987118
408	0.982826	0.983586	0.983844	0.983274	0.988512	0.986843	0.986271	0.987118
409	0.982826	0.983597	0.983855	0.983274	0.988512	0.986864	0.986282	0.987118
410	0.98286	0.983608	0.983866	0.983285	0.988522	0.986875	0.986293	0.987139
411	0.98286	0.983608	0.983888	0.983296	0.988522	0.986896	0.986293	0.987139
412	0.982871	0.983608	0.983888	0.983307	0.988522	0.986906	0.986304	0.987149
413	0.982893	0.983608	0.98392	0.983307	0.988522	0.986906	0.986304	0.987149
414	0.982893	0.983608	0.983942	0.983318	0.988533	0.986917	0.986304	0.987149
415	0.982915	0.983608	0.983953	0.98334	0.988543	0.986928	0.986325	0.987149
416	0.982926	0.983619	0.983953	0.98334	0.988554	0.986938	0.986325	0.987192
417	0.982926	0.98363	0.983964	0.98334	0.988564	0.986938	0.986357	0.987202
418	0.982937	0.983652	0.983975	0.98334	0.988575	0.986938	0.986389	0.987202
419	0.98297	0.983674	0.983986	0.98334	0.988596	0.986949	0.986389	0.987213
420	0.983004	0.983729	0.983986	0.983362	0.988606	0.986949	0.986389	0.987224
421	0.983015	0.98374	0.983997	0.983362	0.988617	0.986959	0.9864	0.987234
422	0.983037	0.98374	0.984019	0.983384	0.988627	0.986959	0.9864	0.987255
423	0.983048	0.98374	0.98403	0.983418	0.988638	0.986959	0.986421	0.987255
424	0.98307	0.98374	0.98403	0.983418	0.988638	0.986981	0.986453	0.987255
425	0.98307	0.98374	0.984041	0.983429	0.988638	0.986991	0.986464	0.987255
426	0.983081	0.983751	0.984041	0.983451	0.988648	0.987002	0.986464	0.987266
427	0.983103	0.983762	0.984062	0.983451	0.988669	0.987002	0.986475	0.987277
428	0.983115	0.983762	0.984073	0.983451	0.988669	0.987013	0.986486	0.987287
429	0.983137	0.983762	0.984073	0.983451	0.988669	0.987013	0.986507	0.987287
430	0.983192	0.983762	0.984084	0.983484	0.98868	0.987034	0.986507	0.987308
431	0.983203	0.983794	0.984095	0.983517	0.98869	0.987055	0.986539	0.987329
432	0.983247	0.983816	0.984095	0.983528	0.988701	0.987066	0.98655	0.987329
433	0.98327	0.983827	0.984106	0.983539	0.988701	0.987087	0.98655	0.987329
434	0.983281	0.983849	0.984106	0.983539	0.988722	0.987087	0.986561	0.987329
435	0.983281	0.98386	0.984128	0.98355	0.988732	0.987087	0.986561	0.987361
436	0.983281	0.983871	0.98415	0.983562	0.988743	0.987108	0.986571	0.987372
437	0.983281	0.983893	0.984161	0.983562	0.988754	0.987108	0.986571	0.987382
438	0.983303	0.983937	0.984183	0.983584	0.988754	0.987119	0.986593	0.987393
439	0.983303	0.983969	0.984183	0.983595	0.988754	0.987129	0.986593	0.987393
440	0.983325	0.98398	0.984194	0.983606	0.988775	0.987151	0.986614	0.987393
441	0.983336	0.984024	0.984215	0.983617	0.988775	0.987172	0.986636	0.987393
442	0.983347	0.984057	0.984226	0.983628	0.988785	0.987172	0.986646	0.987393
443	0.983369	0.984068	0.984226	0.983661	0.988796	0.987172	0.986657	0.987393
444	0.98338	0.98409	0.984226	0.983672	0.988806	0.987172	0.986657	0.987404
445	0.983414	0.984112	0.984226	0.983683	0.988806	0.987172	0.986657	0.987404
446	0.983414	0.984134	0.984226	0.983706	0.988806	0.987182	0.986657	0.987414
447	0.983414	0.984145	0.984237	0.983717	0.988817	0.987182	0.986657	0.987414
448	0.983414	0.984166	0.984281	0.983739	0.988827	0.987182	0.986668	0.987435
449	0.983436	0.984188	0.984281	0.98375	0.988838	0.987214	0.986678	0.987456
450	0.983436	0.984188	0.984303	0.98375	0.988859	0.987214	0.986689	0.987456
451	0.983436	0.984188	0.984303	0.98375	0.988869	0.987236	0.9867	0.987456
452	0.983447	0.984188	0.984325	0.98375	0.988869	0.987257	0.986711	0.987456
453	0.98348	0.98421	0.984336	0.98375	0.988869	0.987257	0.986732	0.987456
454	0.98348	0.984232	0.984369	0.983761	0.988869	0.987257	0.986753	0.987478
455	0.983491	0.984243	0.98439	0.983761	0.98889	0.987289	0.986764	0.987478
456	0.983502	0.984276	0.984401	0.983805	0.988911	0.987289	0.986785	0.987488
457	0.983502	0.984287	0.984412	0.983816	0.988922	0.987289	0.986818	0.987488
458	0.983524	0.984298	0.984434	0.983816	0.988932	0.987289	0.98686	0.987499
459	0.983536	0.984298	0.984434	0.983827	0.988932	0.987299	0.98686	0.987499
460	0.983547	0.984309	0.984445	0.983838	0.988953	0.987321	0.98686	0.987499
461	0.983569	0.98432	0.984445	0.98385	0.988953	0.987321	0.98686	0.98752
462	0.983591	0.984341	0.984456	0.983872	0.988953	0.987321	0.986871	0.987531
463	0.983591	0.984363	0.984467	0.983883	0.988953	0.987321	0.986882	0.987531
464	0.983624	0.984374	0.984478	0.983883	0.988964	0.987321	0.986893	0.987531
465	0.983624	0.984396	0.984489	0.983894	0.988985	0.987331	0.986914	0.987541
466	0.983635	0.984418	0.9845	0.983927	0.988985	0.987342	0.986925	0.987552
467	0.983635	0.984418	0.9845	0.983938	0.988995	0.987363	0.986935	0.987562
468	0.983646	0.984429	0.9845	0.983982	0.988995	0.987374	0.986946	0.987573
469	0.983668	0.98444	0.984532	0.984005	0.988995	0.987384	0.986946	0.987573
470	0.98368	0.984462	0.984543	0.984005	0.989006	0.987384	0.986968	0.987573
471	0.98368	0.984462	0.984565	0.984016	0.989027	0.987395	0.986978	0.987583
472	0.983702	0.984473	0.984576	0.984016	0.989038	0.987395	0.986989	0.987583
473	0.983702	0.984495	0.984587	0.984038	0.989038	0.987405	0.987	0.987594
474	0.983724	0.984506	0.984587	0.984049	0.989059	0.987416	0.98701	0.987594
475	0.983735	0.984506	0.984587	0.984082	0.989059	0.987437	0.987032	0.987605
476	0.983735	0.984528	0.984598	0.984093	0.989059	0.98748	0.987032	0.987615
477	0.983757	0.984528	0.984598	0.984093	0.98908	0.98748	0.987042	0.987626
478	0.983779	0.98456	0.984631	0.984138	0.98909	0.98748	0.987053	0.987626
479	0.98379	0.98456	0.984653	0.984149	0.98909	0.987501	0.987064	0.987626
480	0.983801	0.984582	0.984653	0.984171	0.989111	0.987512	0.987075	0.987647
481	0.983813	0.984593	0.984653	0.984193	0.989111	0.987533	0.987107	0.987647
482	0.983835	0.984604	0.984653	0.984215	0.989111	0.987554	0.987107	0.987658
483	0.983846	0.984615	0.984653	0.984248	0.989111	0.987554	0.987117	0.987679
484	0.983857	0.984626	0.984653	0.984282	0.989122	0.987554	0.987139	0.987689
485	0.983857	0.984637	0.984686	0.984293	0.989122	0.987565	0.98716	0.9877
486	0.983857	0.984648	0.984686	0.984315	0.989122	0.987597	0.987171	0.9877
487	0.983868	0.984692	0.984707	0.984315	0.989122	0.987597	0.987182	0.9877
488	0.983879	0.984703	0.98474	0.984315	0.989132	0.987597	0.987182	0.9877
489	0.98389	0.984724	0.984773	0.984348	0.989132	0.987607	0.987182	0.987711
490	0.983901	0.984724	0.984795	0.984348	0.989153	0.987607	0.987182	0.987721
491	0.983934	0.984757	0.984795	0.98437	0.989185	0.987607	0.987192	0.987721
492	0.983945	0.984768	0.984817	0.984381	0.989185	0.987618	0.987203	0.987721
493	0.983957	0.984768	0.984817	0.984381	0.989195	0.987618	0.987214	0.987721
494	0.983968	0.984779	0.984828	0.984426	0.989195	0.987618	0.987214	0.987721
495	0.983979	0.984779	0.984828	0.984426	0.989195	0.987639	0.987225	0.987732
496	0.983979	0.98479	0.984828	0.984459	0.989206	0.987639	0.987246	0.987742
497	0.98399	0.984801	0.984849	0.98447	0.989216	0.98765	0.987257	0.987753
498	0.98399	0.984801	0.984849	0.98447	0.989237	0.98765	0.987267	0.987774
499	0.984001	0.984801	0.984849	0.984481	0.989248	0.987682	0.98731	0.987795
500	0.984001	0.984801	0.984849	0.984503	0.989248	0.987682	0.987321	0.987827
501	0.984012	0.984801	0.984849	0.984525	0.989248	0.987703	0.987353	0.987827
502	0.984012	0.984812	0.984871	0.984525	0.989248	0.987724	0.987364	0.987827
503	0.984012	0.984812	0.984871	0.984536	0.989259	0.987724	0.987364	0.987838
504	0.984023	0.984812	0.984893	0.984547	0.989301	0.987724	0.987374	0.987859
505	0.984034	0.984845	0.984915	0.984592	0.989301	0.987735	0.987396	0.987859
506	0.984045	0.984856	0.984915	0.984603	0.989311	0.987745	0.987417	0.987869
507	0.984056	0.984878	0.984926	0.984614	0.989311	0.987745	0.987439	0.987869
508	0.984056	0.984878	0.984948	0.984636	0.989322	0.987745	0.987471	0.98788
509	0.984078	0.984889	0.98497	0.984658	0.989332	0.987756	0.987482	0.98789
510	0.984134	0.98491	0.984981	0.984658	0.989332	0.987767	0.987492	0.987901
511	0.984156	0.984921	0.984992	0.98468	0.989343	0.987777	0.987492	0.987912
512	0.984178	0.984921	0.985003	0.984691	0.989343	0.987788	0.987492	0.987922
513	0.984178	0.984943	0.985013	0.984702	0.989364	0.987788	0.987492	0.987922
514	0.984222	0.984965	0.985024	0.984702	0.989364	0.987788	0.987514	0.987933
515	0.984234	0.985009	0.985035	0.984725	0.989395	0.987798	0.987524	0.987943
516	0.984245	0.98502	0.985035	0.984736	0.989437	0.98782	0.987546	0.987954
517	0.984256	0.985042	0.985046	0.984747	0.989448	0.98782	0.987546	0.987965
518	0.984267	0.985053	0.98509	0.984769	0.989448	0.98783	0.987546	0.987965
519	0.984267	0.985064	0.985112	0.98478	0.989458	0.987851	0.987556	0.987975
520	0.984278	0.985064	0.985112	0.98478	0.989458	0.987851	0.987556	0.987986
521	0.984289	0.985075	0.985123	0.98478	0.989458	0.987862	0.987567	0.988007
522	0.984311	0.985107	0.985134	0.984791	0.989458	0.987862	0.987567	0.988017
523	0.984322	0.985118	0.985134	0.984802	0.989458	0.987862	0.987567	0.988017
524	0.984333	0.98514	0.985145	0.984802	0.989458	0.987862	0.987589	0.988028
525	0.984344	0.985151	0.985156	0.984835	0.989458	0.987873	0.987589	0.988039
526	0.984355	0.985162	0.985177	0.984858	0.989458	0.987873	0.987621	0.988049
527	0.984367	0.985173	0.985177	0.984891	0.989458	0.987883	0.987631	0.988049
528	0.984367	0.985173	0.985188	0.984913	0.989458	0.987883	0.987653	0.988049
529	0.984378	0.985184	0.985199	0.984946	0.989458	0.987894	0.987664	0.98806
530	0.984389	0.985195	0.985221	0.984946	0.989469	0.987894	0.987674	0.98807
531	0.9844	0.985195	0.985232	0.984957	0.989469	0.987894	0.987674	0.988081
532	0.984422	0.985206	0.985232	0.984957	0.989469	0.987905	0.987674	0.988081
533	0.984466	0.985217	0.985254	0.984979	0.989469	0.987926	0.987706	0.988081
534	0.984477	0.985228	0.985254	0.985002	0.989469	0.987936	0.987728	0.988081
535	0.984488	0.985228	0.985265	0.985024	0.98949	0.987947	0.987749	0.988081
536	0.984488	0.985239	0.985276	0.985035	0.98949	0.98799	0.987771	0.988102
537	0.984488	0.98525	0.985276	0.985035	0.9895	0.98799	0.987771	0.988123
538	0.984511	0.985261	0.985276	0.985046	0.989511	0.988	0.987792	0.988123
539	0.984511	0.985261	0.98532	0.985046	0.989511	0.988	0.987792	0.988123
540	0.984511	0.985261	0.98533	0.985057	0.989532	0.988011	0.987792	0.988123
541	0.984511	0.985272	0.985341	0.985068	0.989543	0.988011	0.987792	0.988123
542	0.984533	0.985272	0.985341	0.985079	0.989574	0.988011	0.987803	0.988123
543	0.984555	0.985272	0.985352	0.985079	0.989574	0.988011	0.987803	0.988123
544	0.984577	0.985293	0.985352	0.985079	0.989585	0.988032	0.987803	0.988123
545	0.984577	0.985304	0.985363	0.98509	0.989595	0.988043	0.987803	0.988134
546	0.984577	0.985326	0.985374	0.98509	0.989606	0.988053	0.987824	0.988134
547	0.984588	0.985326	0.985374	0.98509	0.989606	0.988064	0.987835	0.988166
548	0.98461	0.985337	0.985385	0.985157	0.989616	0.988064	0.987846	0.988187
549	0.984621	0.985348	0.985396	0.985168	0.989616	0.988075	0.987846	0.988187
550	0.984632	0.985359	0.985396	0.985201	0.989616	0.988096	0.987846	0.988208
551	0.984644	0.985359	0.985407	0.985212	0.989616	0.988096	0.987856	0.988208
552	0.984655	0.985359	0.985407	0.985223	0.989616	0.988096	0.987867	0.988208
553	0.984688	0.985359	0.985418	0.985223	0.989627	0.988096	0.987878	0.988219
554	0.984699	0.985381	0.985462	0.985234	0.989637	0.988117	0.987878	0.98824
555	0.984699	0.985403	0.985483	0.985234	0.989648	0.988117	0.987888	0.988261
556	0.984699	0.985403	0.985483	0.985245	0.989669	0.988117	0.987899	0.988261
557	0.984699	0.985414	0.985494	0.985245	0.989669	0.988117	0.987899	0.988261
558	0.984721	0.985436	0.985494	0.985245	0.989669	0.988117	0.98791	0.988261
559	0.984732	0.985436	0.985494	0.985267	0.98969	0.988138	0.98791	0.988272
560	0.984743	0.985458	0.985494	0.985278	0.989721	0.988149	0.98791	0.988272
561	0.984754	0.985458	0.985527	0.98529	0.989753	0.988149	0.987921	0.988282
562	0.984754	0.985479	0.985527	0.98529	0.989753	0.98817	0.987921	0.988293
563	0.984754	0.98549	0.985538	0.985301	0.989753	0.988181	0.987921	0.988293
564	0.984776	0.98549	0.985549	0.985312	0.989763	0.988181	0.987931	0.988303
565	0.984788	0.98549	0.985549	0.985323	0.989774	0.988191	0.987931	0.988303
566	0.984788	0.985501	0.98556	0.985334	0.989774	0.988191	0.987942	0.988314
567	0.984799	0.985523	0.98556	0.985345	0.989785	0.988213	0.987953	0.988314
568	0.984821	0.985523	0.98556	0.985356	0.989795	0.988234	0.987963	0.988335
569	0.984832	0.985523	0.985582	0.985356	0.989795	0.988234	0.987963	0.988346
570	0.984832	0.985534	0.985593	0.985367	0.989795	0.988234	0.987963	0.988346
571	0.984832	0.985545	0.985593	0.985378	0.989806	0.988234	0.987974	0.988356
572	0.984832	0.985545	0.985604	0.985389	0.989806	0.988255	0.987974	0.988367
573	0.984843	0.985545	0.985615	0.985389	0.989806	0.988266	0.987974	0.988367
574	0.984854	0.985545	0.985637	0.985389	0.989806	0.988276	0.987985	0.988367
575	0.984854	0.985567	0.985647	0.9854	0.989806	0.988287	0.987996	0.988377
576	0.984876	0.985578	0.985658	0.985411	0.989816	0.988298	0.988006	0.988388
577	0.984876	0.9856	0.985691	0.985411	0.989816	0.988298	0.988006	0.988399
578	0.984898	0.9856	0.985702	0.985434	0.989816	0.988298	0.988017	0.98842
579	0.984898	0.985622	0.985702	0.985434	0.989827	0.988308	0.988028	0.98843
580	0.984909	0.985622	0.985713	0.985445	0.989827	0.988308	0.988028	0.988441
581	0.984921	0.985622	0.985724	0.985456	0.989837	0.988308	0.988049	0.988451
582	0.984932	0.985633	0.985735	0.985456	0.989837	0.988308	0.988049	0.988462
583	0.984932	0.985633	0.985735	0.985478	0.989848	0.988329	0.988071	0.988473
584	0.984932	0.985633	0.985746	0.985478	0.989848	0.98834	0.988071	0.988473
585	0.984932	0.985655	0.985746	0.985478	0.989858	0.98834	0.988071	0.988483
586	0.984943	0.985655	0.985757	0.985478	0.989869	0.98834	0.988081	0.988483
587	0.984954	0.985666	0.985779	0.985478	0.989869	0.988361	0.988092	0.988515
588	0.984954	0.985676	0.98579	0.985511	0.989879	0.988372	0.988103	0.988526
589	0.984965	0.985676	0.9858	0.985511	0.989879	0.988372	0.988103	0.988526
590	0.984998	0.985687	0.9858	0.985522	0.98989	0.988382	0.988113	0.988547
591	0.984998	0.985698	0.9858	0.985544	0.98989	0.988382	0.988124	0.988557
592	0.98502	0.98572	0.985811	0.985544	0.98989	0.988404	0.988135	0.988568
593	0.98502	0.98572	0.985833	0.985544	0.98989	0.988436	0.988135	0.988568
594	0.985053	0.98572	0.985866	0.985544	0.98989	0.988436	0.988145	0.988579
595	0.985065	0.98572	0.985888	0.985555	0.989911	0.988457	0.988156	0.9886
596	0.985065	0.985731	0.985921	0.985566	0.989911	0.988457	0.988156	0.98861
597	0.985065	0.985742	0.985921	0.985566	0.989911	0.988467	0.988178	0.98861
598	0.985076	0.985764	0.985921	0.985589	0.989942	0.988467	0.988188	0.988621
599	0.985109	0.985775	0.985932	0.9856	0.989953	0.988489	0.988188	0.988631
600	0.98512	0.985797	0.985954	0.985611	0.989953	0.98851	0.988188	0.988631
601	0.98512	0.985797	0.985975	0.985633	0.989963	0.98851	0.988188	0.988642
602	0.985131	0.985797	0.985975	0.985633	0.989974	0.98851	0.988188	0.988653
603	0.985142	0.985808	0.985986	0.985666	0.989974	0.988521	0.988188	0.988663
604	0.985186	0.985808	0.985986	0.985666	0.989974	0.988521	0.988188	0.988663
605	0.985209	0.985808	0.986008	0.985677	0.989974	0.988531	0.988199	0.988663
606	0.985209	0.985808	0.986019	0.985677	0.989974	0.988531	0.988199	0.988684
607	0.98522	0.985808	0.98603	0.985677	0.989984	0.988531	0.98821	0.988684
608	0.98522	0.98583	0.986052	0.985699	0.989984	0.988542	0.98822	0.988684
609	0.98522	0.985873	0.986052	0.985699	0.989995	0.988552	0.98822	0.988695
610	0.985242	0.985884	0.986085	0.98571	0.989995	0.988552	0.98822	0.988695
611	0.985242	0.985906	0.986085	0.985722	0.989995	0.988552	0.988231	0.988695
612	0.985242	0.985917	0.986107	0.985733	0.989995	0.988552	0.988253	0.988695
613	0.985242	0.985917	0.986107	0.985733	0.989995	0.988563	0.988263	0.988695
614	0.985253	0.985917	0.986107	0.985733	0.989995	0.988563	0.988263	0.988695
615	0.985253	0.985917	0.986117	0.985733	0.989995	0.988584	0.988263	0.988695
616	0.985253	0.985928	0.986117	0.985733	0.989995	0.988584	0.988263	0.988737
617	0.985253	0.985928	0.986117	0.985733	0.990016	0.988595	0.988274	0.988737
618	0.985264	0.985928	0.986139	0.985733	0.990016	0.988595	0.988285	0.988737
619	0.985264	0.985939	0.986139	0.985755	0.990016	0.988605	0.988285	0.988737
620	0.985264	0.985939	0.986139	0.985755	0.990016	0.988616	0.988285	0.988737
621	0.985275	0.985939	0.986139	0.985755	0.990016	0.988616	0.988317	0.988748
622	0.985286	0.985939	0.98615	0.985755	0.990016	0.988616	0.988338	0.988758
623	0.985286	0.985939	0.98615	0.985755	0.990016	0.988637	0.988338	0.988758
624	0.985286	0.985939	0.98615	0.985755	0.990027	0.988659	0.988349	0.988769
625	0.985286	0.985939	0.986172	0.985755	0.990027	0.988669	0.98836	0.988769
626	0.985286	0.98595	0.986172	0.985755	0.990048	0.98868	0.98836	0.98878
627	0.985297	0.98595	0.986172	0.985755	0.990058	0.98869	0.98836	0.98879
628	0.985297	0.98595	0.986183	0.985755	0.990069	0.988701	0.98837	0.988801
629	0.985308	0.985972	0.986205	0.985766	0.99009	0.988722	0.98837	0.988801
630	0.985308	0.985972	0.986216	0.985766	0.99009	0.988722	0.98837	0.988811
631	0.985342	0.985972	0.986216	0.985766	0.990111	0.988722	0.98837	0.988811
633	0.985353	0.985983	0.986216	0.985777	0.990121	0.988733	0.988381	0.988811
634	0.985364	0.985983	0.986227	0.985788	0.990121	0.988744	0.988381	0.988811
635	0.985386	0.985983	0.986227	0.985788	0.990121	0.988775	0.988381	0.988843
636	0.985397	0.986005	0.986227	0.985799	0.990121	0.988775	0.988392	0.988864
637	0.985397	0.986005	0.986238	0.98581	0.990121	0.988775	0.988402	0.988864
638	0.985408	0.986005	0.98626	0.985821	0.990121	0.988775	0.988402	0.988875
639	0.985408	0.986016	0.986271	0.985843	0.990121	0.988786	0.988424	0.988875
640	0.985419	0.986016	0.986281	0.985843	0.990132	0.988797	0.988424	0.988875
641	0.985441	0.986048	0.986281	0.985843	0.990132	0.988807	0.988435	0.988875
642	0.985441	0.986059	0.986281	0.985843	0.990142	0.988807	0.988435	0.988885
643	0.985452	0.986059	0.986303	0.985843	0.990153	0.988807	0.988435	0.988885
644	0.985463	0.986081	0.986303	0.985843	0.990153	0.988807	0.988435	0.988896
645	0.985463	0.986103	0.986314	0.985843	0.990153	0.988818	0.988445	0.988907
646	0.985474	0.986103	0.986314	0.985843	0.990174	0.988818	0.988445	0.988917
647	0.985474	0.986103	0.986325	0.985843	0.990174	0.988828	0.988445	0.988917
648	0.985486	0.986103	0.986325	0.985843	0.990174	0.988839	0.988445	0.988917
649	0.985508	0.986114	0.986325	0.985854	0.990184	0.988839	0.988467	0.988917
650	0.985519	0.986125	0.986325	0.985877	0.990205	0.988839	0.988477	0.988928
651	0.985519	0.986136	0.986336	0.985888	0.990205	0.988839	0.988477	0.988949
652	0.985519	0.986136	0.986347	0.985888	0.990216	0.988871	0.988488	0.988949
653	0.985541	0.986136	0.986358	0.985899	0.990247	0.988903	0.988488	0.988981
654	0.985552	0.986136	0.986358	0.985899	0.990247	0.988913	0.988488	0.988991
655	0.985574	0.986136	0.986358	0.985899	0.990247	0.988935	0.988488	0.989002
656	0.985585	0.986147	0.98638	0.98591	0.990247	0.988935	0.988488	0.989002
657	0.985585	0.986147	0.986424	0.98591	0.990258	0.988945	0.988499	0.989023
658	0.985607	0.986147	0.986424	0.985921	0.990258	0.988956	0.98851	0.989034
659	0.985607	0.986158	0.986424	0.985921	0.990258	0.988967	0.98852	0.989055
660	0.985607	0.986158	0.986434	0.985932	0.990268	0.988967	0.98852	0.989065
661	0.985607	0.986158	0.986445	0.985943	0.990279	0.988977	0.98852	0.989065
662	0.985607	0.98618	0.986445	0.985943	0.9903	0.988988	0.98852	0.989076
663	0.985607	0.98618	0.986445	0.985943	0.990311	0.988988	0.988531	0.989076
664	0.985619	0.986191	0.986445	0.985943	0.990311	0.988988	0.988531	0.989076
665	0.985619	0.986202	0.986467	0.985943	0.990321	0.98902	0.988542	0.989076
666	0.98563	0.986202	0.986467	0.985943	0.990321	0.98902	0.988542	0.989087
667	0.985663	0.986213	0.986467	0.985954	0.990321	0.98902	0.988552	0.989097
668	0.985663	0.986213	0.986489	0.985954	0.990321	0.98902	0.988552	0.989129
669	0.985663	0.986213	0.986489	0.985954	0.990321	0.98902	0.988552	0.98914
670	0.985663	0.986213	0.9865	0.985954	0.990321	0.98902	0.988563	0.98915
671	0.985663	0.986213	0.9865	0.985954	0.990321	0.98903	0.988563	0.989161
672	0.985674	0.986245	0.9865	0.985976	0.990321	0.98903	0.988574	0.989161
673	0.985674	0.986267	0.986533	0.985998	0.990321	0.98903	0.988574	0.989161
674	0.985685	0.986267	0.986533	0.985998	0.990321	0.989041	0.988585	0.989161
675	0.985685	0.986267	0.986533	0.98601	0.990332	0.989051	0.988595	0.989171
676	0.985696	0.986278	0.986555	0.98601	0.990332	0.989062	0.988595	0.989171
677	0.985696	0.9863	0.986555	0.98601	0.990363	0.989094	0.988595	0.989192
678	0.985696	0.986311	0.986566	0.98601	0.990363	0.989105	0.988606	0.989203
679	0.985707	0.986322	0.986577	0.98601	0.990374	0.989105	0.988627	0.989203
680	0.985729	0.986322	0.986577	0.98601	0.990374	0.989115	0.988627	0.989214
681	0.985763	0.986322	0.986577	0.986032	0.990374	0.989136	0.988638	0.989224
682	0.985774	0.986333	0.986577	0.986043	0.990395	0.989158	0.988638	0.989235
683	0.985774	0.986344	0.986577	0.986065	0.990395	0.989158	0.988659	0.989245
684	0.985774	0.986355	0.986577	0.986065	0.990395	0.989158	0.988692	0.989256
685	0.985785	0.986355	0.986588	0.986076	0.990416	0.989158	0.988692	0.989256
686	0.985785	0.986377	0.986588	0.986076	0.990426	0.989158	0.988692	0.989288
687	0.985796	0.986377	0.986609	0.986076	0.990426	0.989158	0.988692	0.989298
688	0.985796	0.986388	0.98662	0.986087	0.990426	0.989158	0.988702	0.989298
689	0.985796	0.986399	0.98662	0.986087	0.990437	0.989168	0.988713	0.989298
690	0.985807	0.986399	0.986631	0.986098	0.990437	0.989179	0.988713	0.98933
691	0.985818	0.986399	0.986642	0.986098	0.990468	0.989179	0.988724	0.98933
692	0.98584	0.986421	0.986642	0.986098	0.990468	0.989179	0.988734	0.98933
693	0.985851	0.986421	0.986642	0.986098	0.990479	0.989211	0.988756	0.98933
694	0.985851	0.986421	0.986664	0.986098	0.9905	0.989221	0.988756	0.98933
695	0.985851	0.986453	0.986675	0.986098	0.99051	0.989221	0.988777	0.98933
696	0.985862	0.986464	0.986719	0.986109	0.990531	0.989232	0.988799	0.98933
697	0.985862	0.986497	0.986719	0.98612	0.990531	0.989253	0.988799	0.989351
698	0.985873	0.986497	0.986719	0.986131	0.990542	0.989264	0.988809	0.989351
699	0.985873	0.986497	0.986719	0.986131	0.990563	0.989274	0.988809	0.989351
700	0.985873	0.986519	0.98673	0.986142	0.990574	0.989274	0.988809	0.989351
701	0.985896	0.98653	0.986741	0.986154	0.990584	0.989274	0.988809	0.989351
702	0.985907	0.98653	0.986751	0.986187	0.990584	0.989274	0.988809	0.989362
703	0.985907	0.986541	0.986762	0.986209	0.990595	0.989274	0.988809	0.989362
704	0.985918	0.986552	0.986762	0.986253	0.990595	0.989274	0.988809	0.989394
705	0.985918	0.986563	0.986762	0.986264	0.990616	0.989296	0.988809	0.989394
706	0.985918	0.986563	0.986762	0.986264	0.990637	0.989306	0.988831	0.989394
707	0.98594	0.986574	0.986773	0.986275	0.990637	0.989317	0.988831	0.989394
708	0.98594	0.986574	0.986795	0.986309	0.990637	0.989328	0.988842	0.989404
709	0.98594	0.986585	0.986817	0.986309	0.990658	0.989349	0.988852	0.989404
710	0.985951	0.986585	0.986828	0.98632	0.990668	0.989349	0.988863	0.989404
711	0.985962	0.986596	0.986828	0.98632	0.990668	0.989381	0.988863	0.989425
712	0.985973	0.986607	0.986861	0.98632	0.990668	0.989402	0.988863	0.989457
713	0.985973	0.986639	0.986905	0.98632	0.990679	0.989402	0.988863	0.989457
714	0.985984	0.98665	0.986905	0.986331	0.990679	0.989413	0.988863	0.989457
715	0.985995	0.98665	0.986905	0.986342	0.990679	0.989413	0.988863	0.989457
716	0.986006	0.986672	0.986937	0.986342	0.990679	0.989413	0.988863	0.989468
717	0.986006	0.986716	0.986937	0.986375	0.990689	0.989423	0.988906	0.989468
718	0.986017	0.986738	0.986948	0.986386	0.990689	0.989444	0.988916	0.989478
719	0.986028	0.986771	0.986959	0.986386	0.99071	0.989455	0.988916	0.989478
720	0.98604	0.986782	0.986981	0.986397	0.99071	0.989455	0.988927	0.989499
721	0.98604	0.986782	0.986981	0.986408	0.99071	0.989455	0.988949	0.98951
722	0.98604	0.986793	0.987014	0.986419	0.99071	0.989466	0.988949	0.989521
723	0.98604	0.986793	0.987014	0.986431	0.990721	0.989476	0.988959	0.989521
724	0.98604	0.986825	0.987036	0.986453	0.990731	0.989476	0.98897	0.989521
725	0.98604	0.986847	0.987058	0.986453	0.990742	0.989487	0.98897	0.989521
726	0.986073	0.986847	0.987058	0.986486	0.990742	0.989508	0.989002	0.989542
727	0.986073	0.986858	0.987068	0.986497	0.990752	0.989508	0.989034	0.989542
728	0.986084	0.986858	0.987068	0.986508	0.990784	0.989519	0.989034	0.989552
729	0.986095	0.986858	0.987068	0.986508	0.990795	0.989519	0.989045	0.989574
730	0.986095	0.98688	0.987079	0.986508	0.990816	0.989519	0.989056	0.989595
731	0.986095	0.98688	0.987101	0.986519	0.990816	0.989529	0.989056	0.989605
732	0.986095	0.98688	0.987112	0.986541	0.990816	0.98954	0.989088	0.989605
733	0.986106	0.986891	0.987112	0.986541	0.990816	0.989561	0.989099	0.989605
734	0.986117	0.986891	0.987112	0.986563	0.990826	0.989561	0.989099	0.989626
735	0.986128	0.986891	0.987123	0.986563	0.990826	0.989561	0.989109	0.989626
736	0.98615	0.986891	0.987156	0.986608	0.990826	0.989572	0.989109	0.989626
737	0.98615	0.986902	0.987167	0.986608	0.990837	0.989572	0.989109	0.989637
738	0.986161	0.986924	0.987178	0.986608	0.990837	0.989572	0.98912	0.989658
739	0.986184	0.986924	0.987178	0.986608	0.990858	0.989572	0.98912	0.989669
740	0.986206	0.986935	0.987178	0.986608	0.990858	0.989572	0.98912	0.989669
741	0.986217	0.98699	0.987178	0.986619	0.990868	0.989593	0.989131	0.989669
742	0.986217	0.987	0.987211	0.98663	0.990879	0.989604	0.989131	0.98969
743	0.98625	0.987	0.987211	0.98663	0.990889	0.989614	0.989141	0.98969
744	0.986261	0.987033	0.987222	0.98663	0.9909	0.989625	0.989141	0.98969
745	0.986272	0.987033	0.987222	0.98663	0.9909	0.989636	0.989163	0.98969
746	0.986283	0.987044	0.987243	0.986652	0.9909	0.989646	0.989174	0.989701
747	0.986294	0.987055	0.987254	0.986663	0.99091	0.989657	0.989174	0.989711
748	0.986305	0.987055	0.987265	0.986685	0.990921	0.989678	0.989174	0.989711
749	0.986305	0.987055	0.987276	0.986685	0.990921	0.989689	0.989184	0.989711
750	0.986305	0.987088	0.987298	0.986696	0.990921	0.989699	0.989184	0.989711
751	0.986328	0.98711	0.987309	0.986707	0.990921	0.989699	0.989184	0.989711
752	0.986339	0.98711	0.987309	0.98673	0.990921	0.98971	0.989184	0.989722
753	0.986339	0.987132	0.987309	0.98673	0.990931	0.98972	0.989184	0.989722
754	0.98635	0.987132	0.987309	0.98673	0.990931	0.98972	0.989195	0.989743
755	0.986372	0.987132	0.98732	0.98673	0.990931	0.989752	0.989195	0.989743
756	0.986372	0.987132	0.98732	0.98673	0.990942	0.989763	0.989195	0.989743
757	0.986372	0.987132	0.98732	0.98673	0.990942	0.989774	0.989206	0.989743
758	0.986372	0.987143	0.987331	0.98673	0.990942	0.989774	0.989206	0.989753
759	0.986372	0.987143	0.987342	0.986741	0.990942	0.989774	0.989216	0.989764
760	0.986372	0.987143	0.987342	0.986774	0.990952	0.989805	0.989227	0.989785
761	0.986372	0.987143	0.987364	0.986785	0.990952	0.989816	0.989238	0.989796
762	0.986372	0.987154	0.987375	0.986796	0.990984	0.989816	0.989238	0.989806
763	0.986383	0.987165	0.987375	0.986796	0.991015	0.989837	0.989238	0.989817
764	0.986383	0.987176	0.987385	0.986818	0.991015	0.989837	0.989248	0.989817
765	0.986405	0.987176	0.987385	0.986829	0.991026	0.989859	0.989259	0.989828
766	0.986427	0.987176	0.987385	0.986829	0.991026	0.989859	0.98927	0.989838
767	0.986427	0.987197	0.987407	0.986829	0.991036	0.989859	0.98927	0.989838
768	0.986438	0.987208	0.987418	0.986829	0.991058	0.98989	0.989291	0.989849
769	0.986438	0.987208	0.987429	0.986829	0.991058	0.98989	0.989302	0.98988
770	0.986438	0.987219	0.98744	0.986829	0.991058	0.98989	0.989313	0.98988
771	0.986438	0.987219	0.987462	0.98684	0.991058	0.989912	0.989323	0.989891
772	0.986438	0.98723	0.987462	0.98684	0.991068	0.989922	0.989334	0.989891
773	0.986461	0.987241	0.987473	0.98684	0.991079	0.989922	0.989366	0.989912
774	0.986461	0.987274	0.987484	0.986851	0.991089	0.989922	0.989388	0.989912
775	0.986472	0.987274	0.987484	0.986885	0.99111	0.989922	0.989398	0.989923
776	0.986494	0.987274	0.987484	0.986885	0.99111	0.989922	0.989398	0.989923
777	0.986516	0.987274	0.987495	0.986896	0.99111	0.989922	0.989409	0.989933
778	0.986516	0.987285	0.987495	0.986918	0.99111	0.989922	0.989431	0.989933
779	0.986527	0.987296	0.987506	0.986918	0.99111	0.989933	0.989431	0.989933
780	0.986538	0.987296	0.987528	0.986918	0.99111	0.989933	0.989452	0.989933
781	0.986549	0.987318	0.987528	0.986929	0.991121	0.989944	0.989473	0.989944
782	0.986549	0.987329	0.987528	0.986929	0.991131	0.989954	0.989473	0.989955
783	0.986571	0.987329	0.987528	0.98694	0.991131	0.989975	0.989473	0.989955
784	0.986594	0.987362	0.987528	0.986962	0.991131	0.989986	0.989495	0.989955
785	0.986594	0.987373	0.987528	0.986962	0.991131	0.989997	0.989516	0.989955
786	0.986594	0.987383	0.987539	0.986973	0.991131	0.990007	0.989516	0.989965
787	0.986594	0.987394	0.987549	0.986973	0.991131	0.990007	0.989516	0.989976
788	0.986605	0.987394	0.987571	0.986984	0.991131	0.990018	0.989527	0.989997
789	0.986616	0.987394	0.987571	0.987007	0.991142	0.990028	0.989538	0.989997
790	0.986627	0.987416	0.987582	0.987018	0.991142	0.990039	0.989548	0.989997
791	0.986638	0.987416	0.987582	0.987029	0.991163	0.99006	0.989548	0.989997
792	0.986638	0.987427	0.987593	0.987029	0.991163	0.990071	0.989559	0.990008
793	0.986638	0.987449	0.987593	0.987029	0.991163	0.990071	0.989559	0.990018
794	0.986638	0.98746	0.987593	0.987029	0.991163	0.990071	0.98957	0.990029
795	0.986671	0.987482	0.987604	0.98704	0.991163	0.990092	0.98958	0.990029
796	0.986682	0.987504	0.987604	0.987051	0.991163	0.990103	0.98958	0.990029
797	0.986704	0.987526	0.987604	0.987062	0.991173	0.990103	0.98958	0.990029
798	0.986704	0.987537	0.987615	0.987073	0.991184	0.990103	0.989591	0.990029
799	0.986715	0.987548	0.987615	0.987095	0.991184	0.990113	0.989591	0.990029
800	0.986738	0.987559	0.987626	0.987117	0.991184	0.990113	0.989602	0.990029
801	0.986749	0.987569	0.987637	0.987128	0.991194	0.990124	0.989602	0.990029
802	0.98676	0.98758	0.987659	0.987151	0.991194	0.990124	0.989634	0.990039
803	0.986782	0.987591	0.987659	0.987162	0.991194	0.990124	0.989655	0.990039
804	0.986793	0.987591	0.987692	0.987173	0.991215	0.990135	0.989666	0.990039
805	0.986793	0.987591	0.987702	0.987173	0.991215	0.990167	0.989698	0.990039
806	0.986815	0.987602	0.987713	0.987173	0.991215	0.990177	0.989709	0.990039
807	0.986826	0.987613	0.987713	0.987173	0.991236	0.990177	0.989709	0.990039
808	0.986826	0.987613	0.987724	0.987173	0.991247	0.990188	0.98972	0.99005
809	0.986837	0.987613	0.987746	0.987184	0.991257	0.990188	0.98973	0.99005
810	0.986837	0.987624	0.987757	0.987195	0.991257	0.990188	0.989741	0.99006
811	0.986859	0.987635	0.987768	0.987217	0.991257	0.990188	0.989741	0.99006
812	0.986882	0.987657	0.987779	0.987228	0.991257	0.990209	0.989752	0.990092
813	0.986893	0.987668	0.98779	0.987261	0.991257	0.990251	0.989805	0.990103
814	0.986926	0.987679	0.98779	0.987272	0.991257	0.990262	0.989805	0.990103
815	0.986948	0.98769	0.987801	0.987272	0.991257	0.990262	0.989805	0.990103
816	0.986959	0.98769	0.987812	0.987272	0.991268	0.990273	0.989805	0.990103
817	0.98697	0.987701	0.987823	0.987272	0.991278	0.990273	0.989816	0.990103
818	0.98697	0.987701	0.987834	0.987283	0.991289	0.990273	0.989816	0.990103
819	0.986992	0.987712	0.987845	0.987295	0.991299	0.990283	0.989827	0.990103
820	0.987003	0.987712	0.987845	0.987295	0.991299	0.990283	0.989837	0.990124
821	0.987015	0.987712	0.987845	0.987295	0.991299	0.990283	0.989859	0.990124
822	0.987037	0.987723	0.987845	0.987295	0.991299	0.990283	0.989859	0.990135
823	0.987037	0.987723	0.987856	0.987295	0.991299	0.990283	0.989859	0.990145
824	0.987037	0.987723	0.987877	0.987295	0.991299	0.990294	0.989859	0.990156
825	0.987048	0.987723	0.987888	0.987306	0.991299	0.990305	0.989859	0.990156
826	0.98707	0.987723	0.987899	0.987328	0.991299	0.990305	0.989859	0.990156
827	0.98707	0.987723	0.987899	0.98735	0.99131	0.990305	0.98987	0.990156
828	0.98707	0.987745	0.987899	0.98735	0.991321	0.990315	0.98988	0.990156
829	0.987081	0.987745	0.987899	0.98735	0.991321	0.990326	0.989891	0.990156
830	0.987092	0.987745	0.987899	0.98735	0.991321	0.990336	0.989912	0.990166
831	0.987092	0.987756	0.98791	0.987361	0.991342	0.990347	0.989912	0.990166
832	0.987092	0.987766	0.98791	0.987372	0.991352	0.990358	0.989912	0.990166
833	0.987092	0.987777	0.987921	0.987372	0.991352	0.990368	0.989934	0.990177
834	0.987092	0.987777	0.987932	0.987372	0.991363	0.990368	0.989966	0.990177
835	0.987092	0.987788	0.987932	0.987383	0.991363	0.990368	0.989977	0.990177
836	0.987114	0.987788	0.987932	0.987383	0.991373	0.990368	0.989987	0.990187
837	0.987125	0.987788	0.987943	0.987383	0.991373	0.990379	0.989987	0.990198
838	0.987125	0.987788	0.987943	0.987394	0.991373	0.9904	0.989987	0.990209
839	0.987125	0.987788	0.987954	0.987394	0.991373	0.9904	0.990009	0.990219
840	0.987136	0.987788	0.987954	0.987405	0.991384	0.990421	0.990009	0.990219
841	0.987136	0.987788	0.987954	0.987416	0.991384	0.990432	0.990019	0.99023
842	0.987136	0.98781	0.987965	0.987427	0.991384	0.990432	0.99003	0.99024
843	0.987148	0.98781	0.987976	0.987427	0.991384	0.990443	0.99003	0.99024
844	0.98717	0.987832	0.987987	0.98745	0.991384	0.990474	0.99003	0.990251
845	0.98717	0.987843	0.988009	0.98745	0.991384	0.990485	0.990041	0.990262
846	0.98717	0.987876	0.988009	0.987461	0.991394	0.990485	0.990041	0.990262
847	0.987181	0.987887	0.988009	0.987472	0.991405	0.990485	0.990062	0.990283
848	0.987203	0.987909	0.988009	0.987472	0.991405	0.990485	0.990062	0.990293
849	0.987203	0.987909	0.988009	0.987494	0.991405	0.990485	0.990062	0.990304
850	0.987214	0.98792	0.988009	0.987494	0.991405	0.990496	0.990073	0.990314
851	0.987214	0.98792	0.98803	0.987505	0.991405	0.990496	0.990073	0.990314
852	0.987214	0.98792	0.98803	0.987516	0.991405	0.990496	0.990073	0.990314
853	0.987225	0.987931	0.988041	0.987527	0.991405	0.990496	0.990084	0.990325
854	0.987225	0.987931	0.988052	0.987527	0.991426	0.990496	0.990084	0.990325
855	0.987225	0.987931	0.988063	0.987538	0.991436	0.990496	0.990094	0.990325
856	0.987236	0.987931	0.988063	0.987549	0.991447	0.990506	0.990094	0.990325
857	0.987236	0.987931	0.988074	0.98756	0.991457	0.990506	0.990094	0.990336
858	0.987247	0.987931	0.988074	0.98756	0.991457	0.990506	0.990105	0.990357
859	0.987247	0.987931	0.988118	0.98756	0.991457	0.990506	0.990105	0.990367
860	0.987258	0.987942	0.988118	0.987583	0.991468	0.990506	0.990105	0.990367
861	0.987269	0.987942	0.988129	0.987583	0.991478	0.990506	0.990105	0.990367
862	0.987269	0.987952	0.98814	0.987594	0.991489	0.990517	0.990105	0.990367
863	0.987269	0.987952	0.988151	0.987594	0.991489	0.990517	0.990127	0.990367
864	0.987269	0.987974	0.988151	0.987605	0.991499	0.990517	0.990159	0.990378
865	0.98728	0.987974	0.988162	0.987616	0.99151	0.990528	0.990169	0.990378
866	0.98728	0.987985	0.988162	0.987616	0.99151	0.990528	0.99018	0.990399
867	0.98728	0.987985	0.988162	0.987627	0.99151	0.990538	0.990191	0.990399
868	0.98728	0.987996	0.988162	0.987627	0.99151	0.990538	0.990191	0.990399
869	0.98728	0.987996	0.988173	0.987649	0.99151	0.990538	0.990191	0.990399
870	0.987292	0.988007	0.988183	0.98766	0.99152	0.990538	0.990191	0.990399
871	0.987292	0.988018	0.988183	0.98766	0.991531	0.990538	0.990223	0.990399
872	0.987303	0.988029	0.988194	0.987671	0.991541	0.990549	0.990223	0.99042
873	0.987303	0.988029	0.988216	0.987671	0.991541	0.990559	0.990223	0.99042
874	0.987303	0.988029	0.988216	0.987671	0.991541	0.99057	0.990223	0.990431
875	0.987303	0.98804	0.988216	0.987671	0.991541	0.99057	0.990223	0.990431
876	0.987314	0.988051	0.988216	0.987671	0.991541	0.990581	0.990223	0.990442
877	0.987325	0.988062	0.988227	0.987693	0.991541	0.990591	0.990223	0.990442
878	0.987325	0.988073	0.988249	0.987693	0.991552	0.990602	0.990244	0.990442
879	0.987325	0.988084	0.988249	0.987693	0.991552	0.990602	0.990244	0.990463
880	0.987325	0.988106	0.988249	0.987693	0.991552	0.990613	0.990266	0.990463
881	0.987347	0.988106	0.988282	0.987693	0.991552	0.990613	0.990266	0.990463
882	0.987347	0.988117	0.988293	0.987693	0.991552	0.990613	0.990266	0.990463
883	0.987347	0.988128	0.988293	0.987693	0.991552	0.990613	0.990276	0.990473
884	0.987358	0.988128	0.988304	0.987715	0.991552	0.990623	0.990276	0.990473
885	0.98738	0.988128	0.988304	0.987715	0.991552	0.990634	0.990287	0.990473
886	0.987391	0.988128	0.988304	0.987738	0.991552	0.990644	0.990287	0.990484
887	0.987391	0.988138	0.988315	0.987738	0.991552	0.990644	0.990287	0.990484
888	0.987402	0.98816	0.988326	0.987738	0.991563	0.990655	0.990298	0.990484
889	0.987402	0.988182	0.988326	0.98776	0.991563	0.990655	0.990298	0.990484
890	0.987413	0.988204	0.988326	0.987771	0.991563	0.990676	0.990309	0.990505
891	0.987413	0.988204	0.988326	0.987793	0.991563	0.990676	0.990319	0.990516
892	0.987425	0.988204	0.988347	0.987815	0.991563	0.990676	0.990319	0.990526
893	0.987436	0.988204	0.988347	0.987815	0.991563	0.990676	0.99033	0.990526
894	0.987458	0.988204	0.988347	0.987815	0.991573	0.990676	0.99033	0.990526
895	0.987458	0.988204	0.988347	0.987826	0.991573	0.990676	0.99033	0.990526
896	0.987469	0.988204	0.988369	0.987848	0.991573	0.990676	0.990341	0.990526
897	0.98748	0.988204	0.988369	0.987859	0.991584	0.990676	0.990351	0.990526
898	0.987502	0.988204	0.988391	0.987859	0.991594	0.990687	0.990362	0.990537
899	0.987502	0.988226	0.988402	0.987871	0.991594	0.990708	0.990384	0.990537
900	0.987524	0.988248	0.988402	0.987871	0.991594	0.990719	0.990384	0.990537
901	0.987535	0.988248	0.988402	0.987871	0.991605	0.990729	0.990384	0.990547
902	0.987535	0.988248	0.988402	0.987871	0.991605	0.990751	0.990394	0.990547
903	0.987546	0.988248	0.988413	0.987871	0.991615	0.990761	0.990394	0.990569
904	0.987546	0.988259	0.988435	0.987871	0.991615	0.990772	0.990405	0.990569
905	0.987557	0.98827	0.988446	0.987882	0.991615	0.990772	0.990405	0.990579
906	0.987557	0.98827	0.988468	0.987893	0.991615	0.990772	0.990405	0.99059
907	0.987591	0.98827	0.988468	0.987904	0.991615	0.990772	0.990405	0.990611
908	0.987591	0.98827	0.988468	0.987904	0.991647	0.990772	0.990405	0.990611
909	0.987591	0.98827	0.988479	0.987904	0.991647	0.990772	0.990416	0.990621
910	0.987591	0.988303	0.9885	0.987915	0.991647	0.990782	0.990416	0.990621
911	0.987602	0.988325	0.988511	0.987926	0.991647	0.990782	0.990426	0.990621
912	0.987602	0.988335	0.988522	0.987926	0.991647	0.990782	0.990426	0.990632
913	0.987613	0.988335	0.988533	0.987948	0.991647	0.990782	0.990437	0.990643
914	0.987613	0.988346	0.988544	0.987948	0.991647	0.990793	0.990437	0.990653
915	0.987624	0.988346	0.988544	0.987948	0.991668	0.990793	0.990448	0.990653
916	0.987646	0.988346	0.988544	0.987948	0.991678	0.990804	0.990448	0.990653
917	0.987657	0.988346	0.988566	0.987959	0.991678	0.990814	0.990448	0.990653
918	0.987668	0.988346	0.988577	0.98797	0.991689	0.990825	0.990459	0.990674
919	0.987679	0.988346	0.988577	0.988015	0.991689	0.990846	0.990459	0.990674
920	0.987679	0.988346	0.988577	0.988026	0.991689	0.990846	0.990459	0.990674
921	0.987679	0.988346	0.988588	0.988026	0.991689	0.990846	0.990469	0.990674
922	0.987679	0.988346	0.988588	0.988037	0.991689	0.990846	0.990469	0.990674
923	0.987679	0.988346	0.988599	0.988059	0.991689	0.990846	0.990469	0.990674
924	0.987679	0.988368	0.988599	0.988059	0.991689	0.990846	0.990469	0.990674
925	0.987679	0.98839	0.988599	0.98807	0.991699	0.990846	0.990469	0.990674
926	0.98769	0.98839	0.988599	0.98807	0.991699	0.990857	0.990469	0.990674
927	0.98769	0.988401	0.98861	0.988081	0.99172	0.990857	0.99048	0.990674
928	0.98769	0.988401	0.98861	0.988092	0.99172	0.990857	0.99048	0.990674
929	0.98769	0.988401	0.98861	0.988092	0.991731	0.990857	0.99048	0.990674
930	0.98769	0.988412	0.988621	0.988092	0.991731	0.990857	0.99048	0.990674
931	0.98769	0.988412	0.988643	0.988092	0.991731	0.990857	0.990501	0.990674
932	0.987702	0.988412	0.988643	0.988092	0.991731	0.990878	0.990512	0.990685
933	0.987724	0.988412	0.988654	0.988092	0.991731	0.990878	0.990512	0.990696
934	0.987724	0.988423	0.988654	0.988092	0.991731	0.990878	0.990512	0.990696
935	0.987735	0.988434	0.988664	0.988092	0.991752	0.990889	0.990512	0.990696
936	0.987735	0.988434	0.988686	0.988103	0.991752	0.990889	0.990523	0.990717
937	0.987768	0.988434	0.988697	0.988114	0.991752	0.990889	0.990523	0.990717
938	0.987779	0.988445	0.988697	0.988125	0.991752	0.99091	0.990534	0.990717
939	0.987779	0.988456	0.988697	0.988147	0.991762	0.990931	0.990534	0.990717
940	0.987812	0.988456	0.988719	0.988147	0.991773	0.990931	0.990566	0.990727
941	0.987823	0.988467	0.988741	0.98817	0.991783	0.990942	0.990566	0.990738
942	0.987823	0.988478	0.988752	0.988181	0.991783	0.990952	0.990566	0.990738
943	0.987823	0.988489	0.988752	0.988181	0.991794	0.990952	0.990566	0.990738
944	0.987834	0.988489	0.988763	0.988192	0.991804	0.990984	0.990576	0.990738
945	0.987857	0.988489	0.988763	0.988203	0.991826	0.990984	0.990576	0.990748
946	0.987868	0.988489	0.988763	0.988203	0.991826	0.990984	0.990587	0.990748
947	0.987868	0.988489	0.988763	0.988203	0.991836	0.990995	0.990587	0.990748
948	0.987879	0.988489	0.988763	0.988225	0.991847	0.990995	0.990598	0.990748
949	0.987879	0.988489	0.988763	0.988225	0.991857	0.990995	0.990608	0.990748
950	0.987879	0.988489	0.988763	0.988236	0.991889	0.990995	0.990608	0.990759
951	0.987879	0.9885	0.988763	0.988247	0.991889	0.990995	0.990619	0.990759
952	0.98789	0.9885	0.988763	0.988258	0.991889	0.990995	0.990619	0.990759
953	0.987912	0.9885	0.988785	0.988269	0.991899	0.991005	0.99063	0.990759
954	0.987923	0.988511	0.988785	0.98828	0.99191	0.991005	0.99063	0.990759
955	0.987923	0.988511	0.988796	0.988303	0.99191	0.991016	0.99063	0.99077
956	0.987934	0.988511	0.988796	0.988303	0.99191	0.991016	0.99063	0.99078
957	0.987945	0.988521	0.988807	0.988314	0.99191	0.991016	0.99063	0.99078
958	0.987945	0.988543	0.988807	0.988336	0.99191	0.991016	0.99063	0.99078
959	0.987956	0.988543	0.988807	0.988336	0.99191	0.991027	0.99063	0.99078
960	0.987956	0.988565	0.988807	0.988336	0.99191	0.991048	0.990651	0.990791
961	0.987967	0.988565	0.988807	0.988336	0.99191	0.991048	0.990651	0.990791
962	0.987967	0.988565	0.988817	0.988336	0.99191	0.991048	0.990662	0.990791
963	0.987967	0.988565	0.988828	0.988336	0.99191	0.991048	0.990673	0.990801
964	0.987967	0.988576	0.988839	0.988336	0.99192	0.991059	0.990673	0.990823
965	0.987979	0.988576	0.988839	0.988336	0.99192	0.991059	0.990673	0.990823
966	0.987979	0.988587	0.988861	0.988336	0.99192	0.991059	0.990683	0.990823
967	0.98799	0.988598	0.988861	0.988336	0.99192	0.991059	0.990694	0.990833
968	0.98799	0.988598	0.988872	0.988347	0.991931	0.991059	0.990694	0.990833
969	0.98799	0.988598	0.988883	0.988347	0.991931	0.991059	0.990705	0.990833
970	0.988012	0.98862	0.988883	0.988369	0.991931	0.991059	0.990705	0.990833
971	0.988012	0.988631	0.988883	0.98838	0.991931	0.991069	0.990705	0.990833
972	0.988023	0.988631	0.988894	0.98838	0.991931	0.99108	0.990716	0.990854
973	0.988045	0.988631	0.988894	0.98838	0.991931	0.99109	0.990716	0.990876
974	0.988045	0.988631	0.988894	0.988391	0.991941	0.99109	0.990716	0.990876
975	0.988045	0.988631	0.988894	0.988391	0.991941	0.991101	0.990726	0.990876
976	0.988056	0.988631	0.988905	0.988391	0.991952	0.991101	0.990726	0.990897
977	0.988056	0.988631	0.988927	0.988391	0.991962	0.991112	0.990726	0.990907
978	0.988056	0.988631	0.988927	0.988391	0.991973	0.991112	0.990737	0.990907
979	0.988056	0.988653	0.988927	0.988402	0.991973	0.991112	0.990748	0.990918
980	0.988078	0.988653	0.988927	0.988424	0.991973	0.991122	0.990748	0.990928
981	0.988078	0.988653	0.988949	0.988424	0.991973	0.991133	0.990758	0.990939
982	0.988089	0.988664	0.98896	0.988435	0.991973	0.991143	0.990758	0.99095
983	0.9881	0.988664	0.98896	0.988447	0.991973	0.991154	0.990769	0.99096
984	0.9881	0.988686	0.988992	0.988458	0.991973	0.991154	0.99078	0.990971
985	0.9881	0.988707	0.988992	0.988469	0.991983	0.991154	0.990812	0.990992
986	0.988111	0.988707	0.988992	0.988491	0.991983	0.991165	0.990812	0.990992
987	0.988123	0.988718	0.988992	0.988491	0.992015	0.991165	0.990812	0.991003
988	0.988134	0.988718	0.988992	0.988491	0.992025	0.991186	0.990812	0.991003
989	0.988156	0.988718	0.988992	0.988524	0.992036	0.991197	0.990812	0.991013
990	0.988167	0.988729	0.988992	0.988535	0.992036	0.991197	0.990833	0.991034
991	0.988167	0.98874	0.988992	0.988546	0.992036	0.991197	0.990844	0.991045
992	0.988178	0.98874	0.989003	0.988546	0.992046	0.991197	0.990844	0.991045
993	0.988178	0.98874	0.989003	0.988568	0.992046	0.991197	0.990855	0.991045
994	0.988189	0.98874	0.989003	0.988579	0.992046	0.991207	0.990855	0.991045
995	0.988189	0.98874	0.989014	0.988591	0.992046	0.991207	0.990855	0.991077
996	0.988189	0.988751	0.989014	0.988591	0.992046	0.991218	0.990865	0.991098
997	0.988222	0.988751	0.989014	0.988591	0.992046	0.991218	0.990865	0.991108
998	0.988222	0.988762	0.989025	0.988591	0.992046	0.991218	0.990865	0.991119
999	0.988222	0.988762	0.989025	0.988602	0.992046	0.991239	0.990865	0.99113
1000	0.988233	0.988762	0.989025	0.988613	0.992057	0.99125	0.990876	0.99113
1001	0.988233	0.988773	0.989025	0.988613	0.992057	0.99126	0.990887	0.99113
1002	0.988233	0.988784	0.989036	0.988613	0.992057	0.99126	0.990887	0.99113
1003	0.988233	0.988806	0.989047	0.988646	0.992057	0.99126	0.990887	0.99113
1004	0.988233	0.988817	0.989058	0.988646	0.992057	0.99126	0.990908	0.99113
1005	0.988244	0.988828	0.989069	0.988646	0.992057	0.991271	0.990919	0.99113
1006	0.988244	0.98885	0.989069	0.988657	0.992057	0.991271	0.990919	0.99113
1007	0.988255	0.988872	0.989069	0.988657	0.992057	0.991271	0.99093	0.99113
1008	0.988255	0.988883	0.98908	0.988668	0.992067	0.991271	0.990951	0.99113
1009	0.988255	0.988915	0.989091	0.988668	0.992067	0.991271	0.990962	0.99114
1010	0.988255	0.988915	0.989102	0.988668	0.992067	0.991282	0.990962	0.991151
1011	0.988278	0.988926	0.989113	0.988668	0.992067	0.991303	0.990962	0.991161
1012	0.988278	0.988926	0.989124	0.988668	0.992067	0.991303	0.990962	0.991161
1013	0.988289	0.988926	0.989145	0.988679	0.992089	0.991313	0.990962	0.991161
1014	0.988289	0.988937	0.989156	0.988679	0.992089	0.991313	0.990973	0.991161
1015	0.988289	0.988937	0.989156	0.988712	0.99212	0.991324	0.990973	0.991172
1016	0.988289	0.988937	0.989167	0.988746	0.992131	0.991324	0.990973	0.991182
1017	0.9883	0.988937	0.989167	0.988757	0.992131	0.991335	0.990983	0.991182
1018	0.9883	0.988937	0.989178	0.988757	0.992141	0.991345	0.990983	0.991193
1019	0.988311	0.988948	0.989233	0.988757	0.992141	0.991345	0.990994	0.991193
1020	0.988311	0.988959	0.989233	0.988757	0.992141	0.991356	0.991005	0.991193
1021	0.988322	0.98897	0.989244	0.988757	0.992141	0.991356	0.991015	0.991204
1022	0.988333	0.988992	0.989244	0.988768	0.992141	0.991356	0.991015	0.991204
1023	0.988333	0.988992	0.989244	0.988768	0.992141	0.991366	0.991015	0.991204
1024	0.988344	0.988992	0.989244	0.988768	0.992141	0.991366	0.991026	0.991204
1025	0.988344	0.989003	0.989255	0.988779	0.992162	0.991377	0.991037	0.991204
1026	0.988344	0.989003	0.989255	0.988801	0.992194	0.991377	0.991037	0.991225
1027	0.988344	0.989003	0.989266	0.988801	0.992194	0.991388	0.991037	0.991225
1028	0.988355	0.989003	0.989266	0.988812	0.992194	0.991388	0.991037	0.991246
1029	0.988355	0.989003	0.989266	0.988812	0.992215	0.991388	0.991037	0.991246
1030	0.988355	0.989003	0.989277	0.988823	0.992225	0.991398	0.991037	0.991246
1032	0.988366	0.989014	0.989288	0.988834	0.992225	0.991409	0.991048	0.991257
1033	0.988377	0.989014	0.989298	0.988834	0.992225	0.991409	0.991058	0.991257
1034	0.988411	0.989036	0.989298	0.988834	0.992225	0.991409	0.991058	0.991257
1035	0.988411	0.989036	0.989298	0.988834	0.992236	0.991409	0.991058	0.991257
1036	0.988411	0.989036	0.989298	0.988845	0.992246	0.991409	0.991058	0.991267
1037	0.988411	0.989036	0.989309	0.988845	0.992246	0.991409	0.991069	0.991267
1039	0.988411	0.989036	0.989309	0.988879	0.992246	0.991409	0.99108	0.991267
1040	0.988433	0.989058	0.989309	0.988879	0.992246	0.991409	0.99108	0.991267
1041	0.988433	0.989058	0.98932	0.98889	0.992246	0.99142	0.99108	0.991267
1042	0.988433	0.989058	0.98932	0.98889	0.992267	0.99142	0.99109	0.991278
1043	0.988433	0.989069	0.98932	0.988901	0.992267	0.99143	0.99109	0.991288
1044	0.988455	0.989069	0.989331	0.988923	0.992267	0.991451	0.99109	0.991299
1045	0.988466	0.98909	0.989331	0.988945	0.992267	0.991473	0.99109	0.99131
1046	0.988477	0.989101	0.989331	0.988945	0.992267	0.991473	0.991101	0.99131
1047	0.988477	0.989101	0.989331	0.988967	0.992267	0.991473	0.991101	0.99132
1048	0.988477	0.989101	0.989331	0.988989	0.992288	0.991473	0.991112	0.99132
1049	0.988488	0.989101	0.989331	0.989	0.992288	0.991473	0.991112	0.991331
1050	0.988499	0.989112	0.989353	0.989023	0.992309	0.991473	0.991112	0.991341
1051	0.98851	0.989112	0.989353	0.989023	0.992309	0.991473	0.991122	0.991341
1052	0.98851	0.989123	0.989386	0.989034	0.99232	0.991483	0.991144	0.991362
1053	0.988521	0.989123	0.989386	0.989034	0.99232	0.991483	0.991155	0.991362
1054	0.988521	0.989123	0.989397	0.989034	0.992331	0.991483	0.991155	0.991362
1055	0.988532	0.989134	0.989408	0.989045	0.992341	0.991483	0.991155	0.991362
1056	0.988532	0.989134	0.989408	0.989045	0.992352	0.991494	0.991155	0.991362
1057	0.988544	0.989134	0.989408	0.989045	0.992352	0.991494	0.991165	0.991362
1058	0.988555	0.989134	0.989419	0.989045	0.992352	0.991515	0.991165	0.991362
1059	0.988577	0.989156	0.989419	0.989056	0.992362	0.991515	0.991165	0.991362
1060	0.988577	0.9892	0.98943	0.989056	0.992362	0.991526	0.991176	0.991373
1061	0.988599	0.9892	0.98943	0.989056	0.992362	0.991536	0.991176	0.991373
1062	0.988599	0.9892	0.98943	0.989056	0.992362	0.991558	0.991176	0.991373
1063	0.98861	0.9892	0.989441	0.989056	0.992362	0.991568	0.991176	0.991394
1064	0.988621	0.989211	0.989441	0.989056	0.992373	0.991568	0.991187	0.991394
1065	0.988621	0.989211	0.989451	0.989056	0.992383	0.991568	0.991187	0.991394
1066	0.988621	0.989211	0.989451	0.989056	0.992383	0.991589	0.991187	0.991415
1067	0.988643	0.989211	0.989462	0.989056	0.992394	0.991589	0.991187	0.991415
1068	0.988665	0.989211	0.989462	0.989067	0.992404	0.991589	0.991187	0.991426
1069	0.988665	0.989222	0.989462	0.989067	0.992415	0.9916	0.991187	0.991426
1070	0.988665	0.989233	0.989462	0.989067	0.992415	0.991611	0.991187	0.991426
1071	0.988688	0.989233	0.989473	0.989067	0.992415	0.991621	0.991197	0.991426
1072	0.988699	0.989244	0.989495	0.989089	0.992425	0.991621	0.991208	0.991437
1073	0.988699	0.989244	0.989495	0.9891	0.992446	0.991632	0.991208	0.991437
1074	0.988699	0.989266	0.989495	0.989111	0.992446	0.991632	0.991208	0.991437
1075	0.988699	0.989266	0.989495	0.989111	0.992457	0.991643	0.991208	0.991437
1076	0.98871	0.989276	0.989506	0.989111	0.992478	0.991674	0.991219	0.991437
1077	0.988732	0.989276	0.989517	0.989111	0.992478	0.991674	0.991219	0.991447
1078	0.988732	0.989298	0.989528	0.989122	0.992478	0.991685	0.99123	0.991458
1079	0.988754	0.98932	0.989528	0.989122	0.992478	0.991685	0.99123	0.991458
1080	0.988754	0.989331	0.989528	0.989133	0.992488	0.991685	0.991251	0.991468
1081	0.988754	0.989342	0.989539	0.989133	0.992509	0.991685	0.991251	0.991468
1082	0.988754	0.989364	0.989539	0.989133	0.992509	0.991685	0.991251	0.991468
1083	0.988754	0.989375	0.989561	0.989133	0.992509	0.991685	0.991251	0.991468
1084	0.988765	0.989375	0.989561	0.989144	0.99252	0.991685	0.991262	0.991479
1085	0.988776	0.989375	0.989572	0.989144	0.99252	0.991706	0.991262	0.9915
1086	0.988776	0.989408	0.989583	0.989144	0.99252	0.991706	0.991262	0.9915
1087	0.988787	0.989408	0.989594	0.989144	0.99252	0.991738	0.991272	0.9915
1088	0.988798	0.989408	0.989594	0.989144	0.99252	0.991738	0.991283	0.9915
1089	0.988821	0.989408	0.989594	0.989144	0.99253	0.991738	0.991283	0.991511
1090	0.988821	0.989408	0.989594	0.989155	0.99253	0.991749	0.991283	0.991511
1091	0.988821	0.989408	0.989594	0.989155	0.992541	0.991749	0.991294	0.991511
1092	0.988832	0.989408	0.989594	0.989155	0.992541	0.991759	0.991294	0.991511
1093	0.988832	0.989419	0.989605	0.989155	0.992541	0.99177	0.991294	0.991521
1094	0.988832	0.98943	0.989615	0.989155	0.992541	0.99177	0.991294	0.991532
1095	0.988843	0.989441	0.989615	0.989155	0.992541	0.99177	0.991294	0.991532
1096	0.988843	0.989441	0.989637	0.989155	0.992541	0.99177	0.991305	0.991542
1097	0.988843	0.989441	0.989637	0.989167	0.992541	0.99177	0.991315	0.991542
1098	0.988843	0.989452	0.989637	0.989167	0.992541	0.99177	0.991337	0.991553
1101	0.988854	0.989452	0.989637	0.989167	0.992541	0.991781	0.991347	0.991553
1103	0.988854	0.989452	0.989637	0.989167	0.992551	0.991781	0.991347	0.991553
1104	0.988865	0.989452	0.989637	0.989167	0.992551	0.991781	0.991347	0.991564
1106	0.988865	0.989452	0.989637	0.989178	0.992551	0.991781	0.991369	0.991564
1107	0.988865	0.989463	0.989637	0.989189	0.992551	0.991781	0.99139	0.991564
1108	0.988865	0.989473	0.989637	0.989233	0.992551	0.991781	0.99139	0.991574
1109	0.988865	0.989484	0.989637	0.989233	0.992551	0.991791	0.99139	0.991574
1110	0.988876	0.989484	0.989648	0.989233	0.992562	0.991791	0.99139	0.991595
1111	0.988876	0.989484	0.989659	0.989233	0.992572	0.991802	0.99139	0.991595
1112	0.988876	0.989495	0.989659	0.989244	0.992594	0.991813	0.99139	0.991606
1113	0.988909	0.989495	0.98967	0.989244	0.992604	0.991813	0.99139	0.991616
1114	0.98892	0.989506	0.98967	0.989244	0.992604	0.991813	0.991401	0.991616
1115	0.98892	0.989506	0.989681	0.989277	0.992604	0.991813	0.991433	0.991616
1116	0.988931	0.989506	0.989692	0.989288	0.992625	0.991813	0.991433	0.991616
1117	0.988931	0.989506	0.989692	0.989288	0.992636	0.991813	0.991433	0.991627
1118	0.988942	0.989506	0.989703	0.989288	0.992636	0.991813	0.991433	0.991627
1119	0.988954	0.989506	0.989703	0.989288	0.992646	0.991813	0.991433	0.991638
1120	0.988965	0.989506	0.989725	0.989299	0.992657	0.991844	0.991444	0.991638
1121	0.988976	0.989517	0.989736	0.989299	0.992657	0.991855	0.991465	0.991648
1122	0.988987	0.989561	0.989736	0.989299	0.992657	0.991855	0.991465	0.991648
1123	0.988987	0.989572	0.989736	0.989299	0.992657	0.991855	0.991476	0.991648
1124	0.988987	0.989572	0.989736	0.989322	0.992667	0.991855	0.991487	0.991648
1125	0.988998	0.989583	0.989736	0.989333	0.992667	0.991855	0.991487	0.991648
1126	0.988998	0.989583	0.989736	0.989333	0.992667	0.991866	0.991519	0.991648
1127	0.989009	0.989594	0.989736	0.989344	0.992667	0.991866	0.991519	0.99168
1128	0.98902	0.989594	0.989736	0.989355	0.992667	0.991866	0.991519	0.991691
1129	0.98902	0.989594	0.989736	0.989366	0.992667	0.991866	0.991519	0.991691
1130	0.98902	0.989594	0.989736	0.989377	0.992678	0.991866	0.99154	0.991712
1131	0.98902	0.989605	0.989736	0.989388	0.992678	0.991866	0.99154	0.991722
1132	0.989031	0.989616	0.989736	0.989421	0.992678	0.991866	0.99154	0.991722
1133	0.989031	0.989649	0.989747	0.989421	0.992699	0.991897	0.99154	0.991722
1134	0.989042	0.989649	0.989758	0.989443	0.992699	0.991908	0.99154	0.991722
1135	0.989064	0.989649	0.989758	0.989443	0.992699	0.991908	0.99154	0.991733
1136	0.989064	0.989659	0.989758	0.989466	0.99272	0.991908	0.99154	0.991743
1137	0.989075	0.989659	0.989768	0.989466	0.99273	0.991908	0.99154	0.991754
1138	0.989075	0.98967	0.989768	0.989466	0.99273	0.991908	0.991551	0.991754
1139	0.989075	0.989692	0.989768	0.989466	0.99273	0.991908	0.991551	0.991754
1140	0.989075	0.989703	0.989779	0.989488	0.992741	0.991929	0.991551	0.991765
1141	0.989098	0.989703	0.989779	0.989488	0.992751	0.991929	0.991562	0.991765
1142	0.989109	0.989703	0.989779	0.989499	0.992751	0.991929	0.991562	0.991775
1143	0.989109	0.989714	0.989779	0.989499	0.992751	0.99194	0.991562	0.991775
1144	0.989109	0.989714	0.989779	0.98951	0.992751	0.991951	0.991562	0.991775
1145	0.98912	0.989714	0.989779	0.98951	0.992772	0.991951	0.991572	0.991775
1146	0.98912	0.989736	0.989779	0.98951	0.992772	0.991951	0.991572	0.991786
1147	0.98912	0.989736	0.989779	0.98951	0.992772	0.991961	0.991572	0.991786
1148	0.98912	0.989736	0.989779	0.989543	0.992772	0.991972	0.991572	0.991796
1149	0.98912	0.989736	0.989779	0.989554	0.992793	0.991972	0.991572	0.991807
1150	0.989131	0.989758	0.98979	0.989576	0.992793	0.991972	0.991572	0.991807
1151	0.989164	0.989769	0.98979	0.989576	0.992793	0.991972	0.991572	0.991807
1152	0.989175	0.989769	0.98979	0.989587	0.992814	0.991982	0.991572	0.991828
1153	0.989175	0.989769	0.98979	0.989587	0.992814	0.991982	0.991572	0.991839
1154	0.989186	0.989769	0.989801	0.989599	0.992825	0.991982	0.991594	0.991839
1155	0.989186	0.989769	0.989801	0.989599	0.992825	0.992004	0.991594	0.991849
1156	0.989197	0.98978	0.989812	0.98961	0.992825	0.992014	0.991594	0.991849
1157	0.989208	0.989791	0.989812	0.98961	0.992825	0.992025	0.991594	0.991881
1158	0.989208	0.989813	0.989812	0.98961	0.992825	0.992025	0.991594	0.991902
1159	0.989208	0.989824	0.989812	0.989621	0.992825	0.992025	0.991594	0.991913
1160	0.989208	0.989824	0.989834	0.989621	0.992825	0.992025	0.991594	0.991923
1161	0.989219	0.989835	0.989834	0.989632	0.992836	0.992036	0.991604	0.991923
1162	0.989219	0.989845	0.989834	0.989632	0.992836	0.992036	0.991604	0.991923
1163	0.989219	0.989878	0.989834	0.989632	0.992836	0.992036	0.991604	0.991923
1164	0.989219	0.989878	0.989834	0.989632	0.992836	0.992036	0.991604	0.991934
1165	0.989219	0.9899	0.989834	0.989632	0.992836	0.992036	0.991604	0.991934
1166	0.989231	0.9899	0.989845	0.989643	0.992836	0.992036	0.991604	0.991934
1167	0.989231	0.989911	0.989867	0.989643	0.992836	0.992036	0.991604	0.991934
1168	0.989231	0.989911	0.989878	0.989665	0.992846	0.992036	0.991615	0.991934
1169	0.989231	0.989922	0.989889	0.989676	0.992857	0.992036	0.991615	0.991945
1170	0.989264	0.989922	0.989889	0.989676	0.992857	0.992046	0.991637	0.991945
1171	0.989275	0.989922	0.989889	0.989676	0.992867	0.992046	0.991637	0.991945
1172	0.989275	0.989933	0.989889	0.989676	0.992878	0.992046	0.991658	0.991945
1173	0.989286	0.989933	0.9899	0.989676	0.992899	0.992046	0.991679	0.991945
1174	0.989297	0.989933	0.9899	0.989687	0.992899	0.992046	0.991679	0.991955
1175	0.989297	0.989933	0.989911	0.989687	0.99292	0.992046	0.991679	0.991955
1176	0.989308	0.989944	0.989922	0.989709	0.99292	0.992046	0.99169	0.991955
1177	0.989319	0.989955	0.989922	0.989709	0.99292	0.992057	0.99169	0.991955
1178	0.98933	0.989966	0.989922	0.98972	0.99292	0.992057	0.991701	0.991955
1179	0.989341	0.989977	0.989922	0.989731	0.99293	0.992057	0.991701	0.991955
1180	0.989375	0.989988	0.989954	0.989731	0.99293	0.992057	0.991701	0.991955
1181	0.989386	0.989988	0.989954	0.989731	0.992951	0.992057	0.991701	0.991955
1182	0.989386	0.989999	0.989954	0.989743	0.992951	0.992057	0.991711	0.991966
1183	0.989386	0.989999	0.989954	0.989743	0.992951	0.992057	0.991711	0.991976
1184	0.989397	0.990021	0.989965	0.989743	0.992951	0.992067	0.991711	0.991976
1185	0.989397	0.990032	0.989976	0.989754	0.992951	0.992067	0.991711	0.991987
1186	0.989397	0.990032	0.989976	0.989754	0.992962	0.992078	0.991722	0.991987
1187	0.989408	0.990042	0.989987	0.989754	0.992962	0.992099	0.991733	0.992019
1188	0.989419	0.990042	0.989998	0.989754	0.992972	0.992099	0.991733	0.992019
1189	0.989419	0.990053	0.990009	0.989765	0.992972	0.99211	0.991733	0.99204
1190	0.98943	0.990064	0.990031	0.989765	0.992972	0.992131	0.991754	0.99204
1191	0.98943	0.990075	0.990031	0.989776	0.992983	0.992131	0.991765	0.99205
1192	0.98943	0.990075	0.990031	0.989776	0.992993	0.992131	0.991765	0.992072
1193	0.98943	0.990086	0.990031	0.989787	0.992993	0.992142	0.991776	0.992082
1194	0.98943	0.990108	0.990031	0.989798	0.993004	0.992142	0.991786	0.992082
1195	0.989463	0.990108	0.990031	0.989798	0.993004	0.992142	0.991797	0.992082
1196	0.989463	0.990108	0.990042	0.989798	0.993014	0.992152	0.991808	0.992103
1197	0.989463	0.990119	0.990053	0.989798	0.993014	0.992152	0.991819	0.992114
1198	0.989463	0.990119	0.990053	0.989798	0.993014	0.992152	0.991819	0.992125
1199	0.989474	0.990119	0.990064	0.989798	0.993014	0.992152	0.991819	0.992135
1200	0.989474	0.990141	0.990075	0.989809	0.993014	0.992163	0.991819	0.992146
1201	0.989496	0.990141	0.990075	0.989809	0.993014	0.992163	0.991819	0.992146
1202	0.989496	0.990152	0.990075	0.989809	0.993025	0.992163	0.991819	0.992146
1203	0.989496	0.990163	0.990075	0.989809	0.993025	0.992163	0.99184	0.992146
1204	0.989508	0.990174	0.990085	0.98982	0.993025	0.992163	0.99184	0.992156
1205	0.989508	0.990174	0.990085	0.98982	0.993035	0.992174	0.99184	0.992177
1206	0.989519	0.990174	0.990085	0.98982	0.993035	0.992195	0.99184	0.992188
1207	0.989541	0.990174	0.990085	0.98982	0.993035	0.992205	0.991851	0.992188
1208	0.989541	0.990207	0.990096	0.98982	0.993035	0.992205	0.991851	0.992188
1209	0.989541	0.990207	0.990118	0.98982	0.993035	0.992205	0.991851	0.992188
1210	0.989541	0.990239	0.990118	0.98982	0.993035	0.992216	0.991861	0.992188
1211	0.989552	0.990239	0.990118	0.989831	0.993046	0.992216	0.991872	0.992199
1212	0.989552	0.99025	0.990118	0.989831	0.993046	0.992216	0.991883	0.99222
1213	0.989552	0.99025	0.990129	0.989831	0.993056	0.992216	0.991904	0.99222
1215	0.989552	0.99025	0.990129	0.989831	0.993056	0.992237	0.991904	0.99222
1216	0.989552	0.99025	0.990129	0.989831	0.993056	0.992259	0.991904	0.99222
1217	0.989552	0.99025	0.99014	0.989842	0.993056	0.992259	0.991904	0.99223
1218	0.989552	0.99025	0.990151	0.989842	0.993067	0.992259	0.991915	0.99223
1219	0.989563	0.99025	0.990173	0.989853	0.993067	0.992269	0.991926	0.99223
1220	0.989574	0.99025	0.990184	0.989853	0.993067	0.992269	0.991926	0.99223
1221	0.989585	0.99025	0.990184	0.989853	0.993067	0.992269	0.991926	0.992252
1222	0.989585	0.99025	0.990184	0.989864	0.993067	0.992269	0.991936	0.992262
1223	0.989585	0.990261	0.990184	0.989864	0.993067	0.992269	0.991936	0.992262
1224	0.989585	0.990261	0.990184	0.989864	0.993077	0.99228	0.991936	0.992273
1225	0.989585	0.990272	0.990195	0.989898	0.993077	0.99229	0.991936	0.992273
1226	0.989585	0.990283	0.990195	0.989898	0.993077	0.992301	0.991958	0.992273
1227	0.989585	0.990305	0.990195	0.989898	0.993099	0.992312	0.991958	0.992283
1228	0.989585	0.990316	0.990195	0.989909	0.993109	0.992322	0.991958	0.992283
1229	0.989596	0.990327	0.990206	0.989909	0.993109	0.992322	0.991958	0.992294
1230	0.989596	0.990338	0.990206	0.98992	0.99312	0.992333	0.99199	0.992294
1231	0.989607	0.990349	0.990228	0.98992	0.99312	0.992343	0.99199	0.992305
1232	0.989607	0.990349	0.990228	0.98992	0.99313	0.992354	0.99199	0.992305
1233	0.989618	0.990349	0.990228	0.989931	0.99313	0.992354	0.992001	0.992315
1234	0.989618	0.990349	0.99026	0.989931	0.99313	0.992354	0.992011	0.992315
1235	0.98964	0.99036	0.99026	0.989942	0.99313	0.992354	0.992011	0.992315
1236	0.989652	0.990371	0.99026	0.989953	0.993151	0.992365	0.992011	0.992315
1237	0.989674	0.990393	0.990271	0.989964	0.993162	0.992365	0.992011	0.992315
1238	0.989674	0.990393	0.990271	0.989964	0.993172	0.992365	0.992022	0.992326
1239	0.989674	0.990393	0.990271	0.989964	0.993172	0.992375	0.992022	0.992326
1240	0.989674	0.990404	0.990271	0.989975	0.993172	0.992375	0.992033	0.992336
1241	0.989674	0.990414	0.990282	0.989975	0.993183	0.992386	0.992033	0.992336
1242	0.989696	0.990414	0.990282	0.989975	0.993183	0.992397	0.992033	0.992336
1243	0.989696	0.990414	0.990293	0.989986	0.993183	0.992407	0.992033	0.992336
1244	0.989696	0.990414	0.990293	0.989986	0.993193	0.992407	0.992043	0.992336
1245	0.989707	0.990414	0.990315	0.989986	0.993193	0.992407	0.992043	0.992357
1246	0.989729	0.990414	0.990315	0.990019	0.993193	0.992407	0.992043	0.992357
1247	0.98974	0.990425	0.990315	0.990031	0.993204	0.992418	0.992043	0.992379
1248	0.98974	0.990425	0.990315	0.990031	0.993225	0.992418	0.992043	0.992379
1249	0.98974	0.990425	0.990315	0.990042	0.993225	0.992418	0.992054	0.9924
1250	0.989751	0.990425	0.990326	0.990042	0.993225	0.992428	0.992065	0.9924
1251	0.989773	0.990425	0.990337	0.990042	0.993225	0.992439	0.992065	0.99241
1252	0.989784	0.990436	0.990348	0.990042	0.993235	0.992439	0.992065	0.99241
1253	0.989796	0.990436	0.990348	0.990042	0.993235	0.992439	0.992076	0.992421
1254	0.989807	0.990436	0.99037	0.990042	0.993235	0.992439	0.992076	0.992432
1255	0.989829	0.990447	0.99037	0.990042	0.993246	0.992439	0.992076	0.992442
1256	0.989829	0.990447	0.99037	0.990053	0.993246	0.992439	0.992076	0.992442
1257	0.989829	0.990447	0.99037	0.990053	0.993256	0.992439	0.992076	0.992453
1258	0.989829	0.990458	0.99037	0.990053	0.993256	0.992439	0.992076	0.992453
1259	0.989829	0.990469	0.990381	0.990053	0.993256	0.992439	0.992076	0.992453
1260	0.989829	0.990469	0.990381	0.990064	0.993288	0.992439	0.992076	0.992453
1261	0.989829	0.99048	0.990381	0.990075	0.993309	0.992439	0.992086	0.992453
1262	0.989829	0.99048	0.990381	0.990075	0.993309	0.992439	0.992086	0.992474
1263	0.98984	0.990491	0.990381	0.990075	0.993309	0.992439	0.992086	0.992474
1264	0.98984	0.990491	0.990381	0.990086	0.993309	0.992439	0.992086	0.992474
1265	0.98984	0.990502	0.990392	0.990086	0.993309	0.992439	0.992086	0.992484
1266	0.989851	0.990513	0.990402	0.990086	0.993319	0.992439	0.992086	0.992484
1267	0.989862	0.990513	0.990413	0.990097	0.99333	0.992439	0.992086	0.992495
1269	0.989862	0.990513	0.990446	0.990097	0.99334	0.992439	0.992086	0.992495
1270	0.989862	0.990513	0.990446	0.990108	0.99334	0.99245	0.992086	0.992506
1271	0.989862	0.990524	0.990446	0.990108	0.99334	0.99245	0.992086	0.992506
1272	0.989862	0.990524	0.990446	0.990119	0.99334	0.99245	0.992108	0.992506
1273	0.989862	0.990524	0.990446	0.990119	0.993362	0.99245	0.992108	0.992506
1274	0.989862	0.990524	0.990446	0.990119	0.993362	0.99246	0.992108	0.992506
1275	0.989884	0.990524	0.990446	0.99013	0.993372	0.99246	0.992118	0.992506
1276	0.989884	0.990524	0.990446	0.990141	0.993383	0.99246	0.992118	0.992506
1277	0.989884	0.990524	0.990446	0.990141	0.993383	0.99246	0.992118	0.992527
1278	0.989884	0.990535	0.990446	0.990141	0.993383	0.992471	0.992118	0.992527
1279	0.989895	0.990557	0.990446	0.990163	0.993393	0.992471	0.992118	0.992527
1280	0.989906	0.990557	0.990446	0.990163	0.993404	0.992471	0.992118	0.992527
1281	0.989906	0.990557	0.990457	0.990163	0.993414	0.992471	0.992129	0.992527
1282	0.989906	0.990557	0.990468	0.990163	0.993414	0.992482	0.992129	0.992527
1283	0.989917	0.990557	0.990479	0.990175	0.993414	0.992482	0.992129	0.992548
1284	0.989929	0.99059	0.990512	0.990175	0.993425	0.992482	0.992129	0.992548
1285	0.989962	0.99059	0.990512	0.990186	0.993425	0.992482	0.99214	0.992548
1286	0.989973	0.99059	0.990512	0.990186	0.993446	0.992482	0.99214	0.992548
1287	0.989973	0.990601	0.990523	0.990186	0.993446	0.992482	0.99214	0.992559
1288	0.989984	0.990601	0.990545	0.990186	0.993456	0.992482	0.99214	0.992559
1289	0.990006	0.990622	0.990545	0.990186	0.993467	0.992492	0.992151	0.992559
1290	0.990017	0.990622	0.990545	0.990186	0.993477	0.992492	0.992151	0.992569
1291	0.990017	0.990622	0.990556	0.990186	0.993498	0.992503	0.992151	0.992569
1292	0.990017	0.990633	0.990556	0.990186	0.993498	0.992503	0.992151	0.992569
1293	0.990017	0.990644	0.990556	0.990197	0.993498	0.992503	0.992151	0.99259
1294	0.990017	0.990644	0.990556	0.99023	0.993509	0.992503	0.992161	0.99259
1295	0.990017	0.990644	0.990556	0.990252	0.993519	0.992513	0.992161	0.99259
1296	0.990017	0.990655	0.990556	0.990274	0.993519	0.992524	0.992161	0.99259
1297	0.990017	0.990666	0.990566	0.990274	0.993519	0.992524	0.992172	0.99259
1298	0.990028	0.990666	0.990566	0.990274	0.993519	0.992545	0.992172	0.99259
1299	0.990039	0.990666	0.990577	0.990285	0.993519	0.992545	0.992172	0.99259
1300	0.990039	0.990666	0.990588	0.990285	0.99353	0.992545	0.992172	0.992601
1301	0.99005	0.990666	0.99061	0.990285	0.99353	0.992556	0.992183	0.992601
1302	0.990061	0.990666	0.990621	0.990285	0.99353	0.992577	0.992183	0.992611
1303	0.990061	0.990666	0.990621	0.990308	0.99353	0.992577	0.992193	0.992611
1304	0.990061	0.990666	0.990621	0.990319	0.99353	0.992588	0.992225	0.992611
1305	0.990061	0.990677	0.990621	0.990319	0.993551	0.992598	0.992225	0.992611
1306	0.990084	0.990688	0.990621	0.99033	0.993551	0.992609	0.992236	0.992611
1307	0.990095	0.990688	0.990621	0.99033	0.993551	0.992609	0.992236	0.992611
1308	0.990095	0.990688	0.990632	0.99033	0.993551	0.992609	0.992236	0.992611
1309	0.990095	0.990688	0.990632	0.99033	0.993551	0.99262	0.992247	0.992622
1310	0.990095	0.990688	0.990643	0.99033	0.993551	0.99262	0.992247	0.992622
1312	0.990106	0.990688	0.990643	0.990341	0.993561	0.99262	0.992247	0.992622
1313	0.990106	0.990688	0.990643	0.990341	0.993561	0.99262	0.992247	0.992633
1314	0.990106	0.990688	0.990643	0.990341	0.993572	0.99262	0.992268	0.992643
1315	0.990117	0.990699	0.990643	0.990341	0.993582	0.99263	0.992268	0.992643
1316	0.990117	0.99071	0.990643	0.990341	0.993593	0.99263	0.992279	0.992664
1317	0.990139	0.99071	0.990643	0.990363	0.993593	0.99263	0.992279	0.992664
1318	0.990139	0.99071	0.990643	0.990385	0.993593	0.99263	0.992279	0.992675
1319	0.990139	0.99071	0.990654	0.990385	0.993593	0.992641	0.992279	0.992675
1320	0.990139	0.990721	0.990654	0.990385	0.993593	0.992651	0.9923	0.992686
1321	0.990139	0.990732	0.990665	0.990385	0.993593	0.992651	0.9923	0.992696
1322	0.990139	0.990732	0.990665	0.990385	0.993593	0.992662	0.992311	0.992696
1323	0.990139	0.990732	0.990676	0.990396	0.993593	0.992662	0.992311	0.992696
1324	0.990139	0.990732	0.990687	0.990396	0.993593	0.992673	0.992311	0.992696
1325	0.99015	0.990754	0.990709	0.990407	0.993593	0.992673	0.992333	0.992696
1326	0.99015	0.990765	0.990719	0.990407	0.993593	0.992673	0.992333	0.992717
1327	0.990161	0.990765	0.990719	0.990407	0.993604	0.992683	0.992333	0.992717
1328	0.990172	0.990765	0.99073	0.990418	0.993604	0.992683	0.992375	0.992717
1329	0.990194	0.990776	0.990741	0.990418	0.993604	0.992683	0.992375	0.992728
1330	0.990194	0.990776	0.990741	0.990418	0.993614	0.992694	0.992375	0.992728
1331	0.990194	0.990797	0.990741	0.990418	0.993625	0.992694	0.992375	0.992728
1332	0.990206	0.990797	0.990741	0.990418	0.993625	0.992705	0.992375	0.992739
1333	0.990228	0.990797	0.990741	0.99044	0.993635	0.992715	0.992386	0.992749
1334	0.990239	0.990797	0.990741	0.990452	0.993646	0.992715	0.992397	0.99276
1335	0.990239	0.990797	0.990752	0.990452	0.993656	0.992726	0.992397	0.99276
1336	0.99025	0.990797	0.990763	0.990463	0.993667	0.992726	0.992408	0.99276
1337	0.99025	0.990797	0.990774	0.990463	0.993677	0.992747	0.99244	0.99277
1338	0.990261	0.990797	0.990774	0.990474	0.993677	0.992747	0.99244	0.99277
1339	0.990261	0.990808	0.990774	0.990474	0.993677	0.992758	0.99245	0.99277
1340	0.990261	0.990819	0.990774	0.990474	0.993677	0.992758	0.99245	0.992791
1341	0.990261	0.990819	0.990785	0.990474	0.993677	0.992758	0.99245	0.992791
1342	0.990272	0.990819	0.990796	0.990485	0.993688	0.992758	0.992472	0.992791
1343	0.990283	0.990819	0.990807	0.990485	0.993688	0.992758	0.992472	0.992791
1344	0.990283	0.990819	0.990807	0.990496	0.993688	0.992758	0.992482	0.992802
1345	0.990294	0.990819	0.990807	0.990496	0.993688	0.992758	0.992504	0.992823
1346	0.990305	0.990819	0.990807	0.990518	0.993688	0.992758	0.992515	0.992823
1347	0.990316	0.990819	0.990807	0.990529	0.993698	0.992768	0.992515	0.992823
1348	0.990316	0.99083	0.990829	0.99054	0.993709	0.992768	0.992525	0.992823
1349	0.990316	0.990841	0.990829	0.99054	0.993709	0.992768	0.992536	0.992823
1350	0.990316	0.990852	0.990851	0.99054	0.993709	0.992768	0.992547	0.992823
1351	0.990327	0.990852	0.990851	0.99054	0.993719	0.992789	0.992547	0.992834
1352	0.990327	0.990852	0.990851	0.990551	0.99373	0.992789	0.992557	0.992834
1353	0.990327	0.990874	0.990851	0.990562	0.99373	0.992789	0.992557	0.992834
1354	0.990327	0.990896	0.990851	0.990573	0.99373	0.992789	0.992568	0.992834
1356	0.990338	0.990918	0.990851	0.990573	0.99374	0.992789	0.992568	0.992844
1357	0.99035	0.990918	0.990873	0.990584	0.993751	0.9928	0.992568	0.992844
1358	0.990361	0.990918	0.990883	0.990584	0.993751	0.9928	0.992579	0.992844
1359	0.990372	0.990918	0.990883	0.990596	0.993761	0.9928	0.992579	0.992844
1360	0.990372	0.990918	0.990883	0.990607	0.993761	0.992811	0.992579	0.992844
1361	0.990372	0.990918	0.990883	0.990618	0.993761	0.992832	0.992579	0.992844
1362	0.990372	0.990929	0.990883	0.990618	0.993761	0.992832	0.992579	0.992855
1363	0.990372	0.99094	0.990883	0.990618	0.993761	0.992843	0.992579	0.992855
1364	0.990383	0.99094	0.990883	0.990629	0.993772	0.992853	0.9926	0.992855
1365	0.990383	0.990951	0.990883	0.990629	0.993772	0.992853	0.9926	0.992855
1366	0.990383	0.990951	0.990883	0.990629	0.993772	0.992874	0.9926	0.992855
1367	0.990383	0.990951	0.990894	0.990629	0.993772	0.992874	0.992611	0.992876
1368	0.990394	0.990951	0.990905	0.990629	0.993782	0.992885	0.992622	0.992876
1369	0.990394	0.990962	0.990905	0.99064	0.993782	0.992896	0.992622	0.992876
1370	0.990394	0.990962	0.990916	0.99064	0.993782	0.992906	0.992622	0.992897
1371	0.990405	0.990962	0.990916	0.990651	0.993782	0.992906	0.992622	0.992908
1372	0.990405	0.990962	0.990916	0.990662	0.993782	0.992917	0.992643	0.992908
1373	0.990416	0.990962	0.990927	0.990662	0.993782	0.992917	0.992643	0.992908
1374	0.990427	0.990962	0.990938	0.990662	0.993782	0.992917	0.992643	0.992908
1375	0.990427	0.990983	0.990938	0.990662	0.993782	0.992917	0.992665	0.992908
1376	0.990449	0.990983	0.990949	0.990662	0.993793	0.992917	0.992665	0.992908
1377	0.990449	0.990983	0.99096	0.990662	0.993793	0.992917	0.992665	0.992908
1378	0.990471	0.990994	0.99096	0.990662	0.993793	0.992917	0.992665	0.992908
1379	0.990483	0.990994	0.990982	0.990662	0.993793	0.992917	0.992675	0.992908
1380	0.990483	0.990994	0.990982	0.990673	0.993793	0.992928	0.992675	0.992908
1381	0.990483	0.990994	0.990982	0.990673	0.993803	0.992938	0.992686	0.992918
1382	0.990494	0.990994	0.990982	0.990673	0.993814	0.992938	0.992697	0.992918
1383	0.990494	0.990994	0.991004	0.990673	0.993814	0.992938	0.992697	0.992918
1385	0.990505	0.990994	0.991015	0.990673	0.993814	0.992938	0.992707	0.992918
1387	0.990505	0.991005	0.991026	0.990673	0.993814	0.992938	0.992707	0.992918
1388	0.990516	0.991005	0.991036	0.990673	0.993824	0.992938	0.992707	0.992918
1389	0.990527	0.991005	0.991036	0.990684	0.993835	0.992949	0.992707	0.992918
1390	0.990527	0.991016	0.991047	0.990684	0.993835	0.992949	0.992718	0.992918
1391	0.990538	0.991016	0.991058	0.990684	0.993835	0.992959	0.992718	0.992918
1392	0.990549	0.991016	0.991058	0.990706	0.993835	0.992959	0.992718	0.992918
1393	0.990549	0.991016	0.991058	0.990706	0.993835	0.99297	0.992729	0.992918
1394	0.990549	0.991016	0.991069	0.990717	0.993835	0.99297	0.99274	0.992918
1395	0.990549	0.991027	0.991069	0.990728	0.993835	0.992981	0.99275	0.992929
1396	0.99056	0.991038	0.991069	0.990728	0.993835	0.992981	0.992772	0.992929
1397	0.99056	0.991038	0.991069	0.990728	0.993835	0.992981	0.992782	0.992929
1398	0.99056	0.991049	0.99108	0.99074	0.993835	0.992981	0.992782	0.992929
1399	0.99056	0.99106	0.991091	0.99074	0.993845	0.992981	0.992782	0.992929
1400	0.99056	0.99106	0.991091	0.99074	0.993856	0.992981	0.992804	0.992929
1401	0.99056	0.99106	0.991091	0.99074	0.993856	0.992991	0.992804	0.99295
1402	0.990582	0.99106	0.991091	0.99074	0.993856	0.992991	0.992804	0.99295
1403	0.990582	0.99106	0.991113	0.99074	0.993856	0.993002	0.992814	0.99295
1404	0.990582	0.99106	0.991113	0.990762	0.993867	0.993002	0.992836	0.99295
1405	0.990604	0.99106	0.991113	0.990762	0.993867	0.993002	0.992836	0.992961
1406	0.990615	0.991071	0.991113	0.990762	0.993867	0.993012	0.992836	0.992961
1407	0.990615	0.991071	0.991113	0.990762	0.993867	0.993023	0.992847	0.992971
1408	0.990615	0.991071	0.991113	0.990773	0.993867	0.993023	0.992857	0.992982
1409	0.990627	0.991071	0.991113	0.990773	0.993867	0.993023	0.992868	0.992982
1410	0.990627	0.991071	0.991124	0.990773	0.993867	0.993034	0.992868	0.992993
1411	0.990638	0.991071	0.991135	0.990773	0.993867	0.993034	0.992879	0.992993
1412	0.990638	0.991093	0.991157	0.990773	0.993867	0.993076	0.992879	0.992993
1413	0.990638	0.991093	0.991168	0.990773	0.993867	0.993087	0.9929	0.992993
1414	0.990638	0.991093	0.9912	0.990773	0.993867	0.993087	0.992911	0.992993
1415	0.990638	0.991093	0.9912	0.990773	0.993877	0.993087	0.992911	0.992993
1416	0.990649	0.991093	0.9912	0.990773	0.993877	0.993087	0.992911	0.993014
1417	0.990649	0.991093	0.9912	0.990773	0.993877	0.993097	0.992911	0.993014
1418	0.990649	0.991093	0.991211	0.990784	0.993898	0.993097	0.992922	0.993014
1419	0.99066	0.991093	0.991211	0.990795	0.993898	0.993097	0.992922	0.993014
1420	0.990671	0.991093	0.991211	0.990806	0.993898	0.993097	0.992932	0.993014
1421	0.990682	0.991093	0.991211	0.990817	0.993898	0.993108	0.992932	0.993014
1422	0.990682	0.991093	0.991222	0.990817	0.993898	0.993108	0.992932	0.993014
1423	0.990682	0.991093	0.991222	0.990817	0.993898	0.993129	0.992954	0.993024
1424	0.990682	0.991093	0.991233	0.990817	0.993898	0.993129	0.992954	0.993024
1425	0.990682	0.991104	0.991233	0.990817	0.993909	0.99314	0.992954	0.993035
1426	0.990682	0.991104	0.991233	0.990828	0.993909	0.99314	0.992954	0.993035
1427	0.990693	0.991148	0.991244	0.990828	0.993909	0.993151	0.992954	0.993035
1428	0.990704	0.991148	0.991255	0.990828	0.993909	0.993151	0.992954	0.993035
1429	0.990704	0.991159	0.991255	0.990839	0.993909	0.993151	0.992964	0.993035
1430	0.990704	0.991159	0.991255	0.99085	0.993909	0.993151	0.992986	0.993035
1432	0.990715	0.99117	0.991277	0.990861	0.993909	0.993151	0.992986	0.993035
1433	0.990726	0.99117	0.991299	0.990872	0.993909	0.993161	0.993007	0.993056
1434	0.990726	0.99118	0.99131	0.990884	0.993909	0.993161	0.993018	0.993056
1435	0.990726	0.99118	0.991321	0.990884	0.993909	0.993182	0.993018	0.993056
1436	0.990726	0.99118	0.991321	0.990884	0.993909	0.993193	0.993029	0.993056
1437	0.990737	0.991202	0.991343	0.990884	0.993909	0.993204	0.993029	0.993067
1438	0.990737	0.991202	0.991343	0.990895	0.993909	0.993204	0.993029	0.993067
1439	0.990737	0.991213	0.991353	0.990895	0.993909	0.993214	0.993029	0.993067
1440	0.99076	0.991235	0.991364	0.990895	0.993909	0.993214	0.993029	0.993077
1441	0.990771	0.991268	0.991375	0.990895	0.993909	0.993214	0.993039	0.993088
1442	0.990771	0.991268	0.991386	0.990906	0.993909	0.993214	0.993039	0.993098
1443	0.990771	0.991268	0.991386	0.990906	0.993909	0.993214	0.99305	0.993098
1444	0.990782	0.991268	0.991386	0.990917	0.993909	0.993214	0.993061	0.993098
1445	0.990782	0.991268	0.991386	0.990917	0.993909	0.993214	0.993061	0.993109
1446	0.990793	0.991268	0.991386	0.990928	0.993909	0.993214	0.993061	0.993109
1447	0.990793	0.991279	0.991386	0.990928	0.993909	0.993214	0.993061	0.993109
1448	0.990793	0.991279	0.991386	0.990939	0.993909	0.993214	0.993061	0.993109
1449	0.990793	0.991279	0.991386	0.990939	0.993909	0.993225	0.993061	0.993109
1450	0.990804	0.991279	0.991397	0.990939	0.993909	0.993225	0.993061	0.993109
1451	0.990804	0.991279	0.991397	0.990939	0.993919	0.993225	0.993071	0.993109
1453	0.990815	0.991279	0.991408	0.99095	0.993919	0.993225	0.993071	0.99312
1454	0.990815	0.991279	0.991419	0.990961	0.993919	0.993225	0.993082	0.99313
1456	0.990826	0.99129	0.991419	0.990961	0.993919	0.993225	0.993082	0.99313
1457	0.990826	0.99129	0.99143	0.990972	0.99393	0.993225	0.993082	0.99313
1458	0.990826	0.99129	0.991441	0.990972	0.99394	0.993225	0.993082	0.993141
1459	0.990826	0.99129	0.991452	0.990972	0.993961	0.993225	0.993082	0.993141
1460	0.990826	0.991301	0.991452	0.990972	0.993961	0.993235	0.993093	0.993151
1461	0.990859	0.991312	0.991463	0.990983	0.993961	0.993235	0.993093	0.993151
1462	0.990859	0.991323	0.991474	0.991005	0.993961	0.993235	0.993114	0.993173
1463	0.990859	0.991334	0.991485	0.991005	0.993961	0.993235	0.993114	0.993173
1464	0.99087	0.991334	0.991485	0.991005	0.993961	0.993246	0.993125	0.993173
1465	0.99087	0.991345	0.991485	0.991028	0.993972	0.993246	0.993136	0.993183
1466	0.99087	0.991356	0.991485	0.99105	0.993972	0.993246	0.993136	0.993194
1467	0.99087	0.991356	0.991485	0.991083	0.993972	0.993267	0.993136	0.993194
1468	0.99087	0.991356	0.991485	0.991083	0.993972	0.993278	0.993136	0.993194
1469	0.99087	0.991366	0.991485	0.991105	0.993972	0.993289	0.993136	0.993204
1470	0.99087	0.991366	0.991485	0.991116	0.993972	0.993299	0.993136	0.993204
1471	0.99087	0.991366	0.991485	0.991116	0.993972	0.993299	0.993146	0.993204
1472	0.99087	0.991388	0.991485	0.991127	0.993982	0.993299	0.993146	0.993204
1473	0.99087	0.991388	0.991496	0.991127	0.993982	0.993299	0.993168	0.993215
1474	0.99087	0.991388	0.991496	0.991127	0.993982	0.993331	0.993168	0.993215
1475	0.99087	0.991388	0.991496	0.991149	0.993982	0.993352	0.993168	0.993225
1476	0.990881	0.991399	0.991496	0.99116	0.993982	0.993352	0.993168	0.993236
1477	0.990881	0.991399	0.991496	0.991194	0.993982	0.993352	0.993168	0.993236
1478	0.990892	0.991399	0.991507	0.991194	0.993982	0.993363	0.993168	0.993236
1479	0.990904	0.991399	0.991517	0.991194	0.993982	0.993363	0.993179	0.993236
1480	0.990904	0.991399	0.991517	0.991205	0.993982	0.993363	0.993189	0.993236
1481	0.990904	0.991432	0.991528	0.991205	0.993982	0.993363	0.993189	0.993236
1482	0.990904	0.991432	0.991539	0.991205	0.993993	0.993374	0.993189	0.993236
1483	0.990904	0.991443	0.991539	0.991205	0.993993	0.993384	0.993189	0.993236
1485	0.990926	0.991443	0.991539	0.991205	0.993993	0.993395	0.993189	0.993236
1486	0.990926	0.991443	0.991539	0.991216	0.993993	0.993395	0.993189	0.993236
1487	0.990926	0.991443	0.991539	0.991227	0.993993	0.993395	0.993189	0.993236
1488	0.990926	0.991443	0.991539	0.991227	0.994003	0.993395	0.993189	0.993236
1489	0.990959	0.991443	0.991539	0.991238	0.994003	0.993395	0.993189	0.993236
1490	0.990959	0.991443	0.99155	0.991238	0.994003	0.993395	0.993189	0.993236
1491	0.99097	0.991454	0.99155	0.991238	0.994003	0.993405	0.993189	0.993247
1492	0.99097	0.991454	0.991561	0.991238	0.994003	0.993405	0.993189	0.993247
1493	0.990981	0.991454	0.991561	0.991238	0.994003	0.993405	0.9932	0.993247
1494	0.990992	0.991454	0.991572	0.991238	0.994003	0.993405	0.993211	0.993247
1496	0.990992	0.991454	0.991572	0.991238	0.994003	0.993405	0.993221	0.993257
1497	0.990992	0.991454	0.991583	0.991238	0.994003	0.993416	0.993221	0.993257
1498	0.990992	0.991454	0.991583	0.991238	0.994003	0.993416	0.993221	0.993278
1499	0.990992	0.991454	0.991583	0.991238	0.994014	0.993416	0.993232	0.993278
1501	0.990992	0.991476	0.991583	0.991238	0.994014	0.993427	0.993232	0.993278
1502	0.990992	0.991476	0.991583	0.991238	0.994014	0.993427	0.993243	0.993278
1503	0.990992	0.991487	0.991583	0.991249	0.994014	0.993427	0.993243	0.993278
1504	0.990992	0.991487	0.991583	0.99126	0.994024	0.993427	0.993254	0.993278
1505	0.991003	0.991498	0.991605	0.99126	0.994024	0.993427	0.993264	0.993278
1506	0.991003	0.991498	0.991605	0.99126	0.994024	0.993437	0.993264	0.993278
1507	0.991003	0.991498	0.991616	0.99126	0.994024	0.993437	0.993264	0.993278
1508	0.991003	0.991498	0.991616	0.991271	0.994024	0.993437	0.993275	0.993289
1509	0.991014	0.991509	0.991616	0.991282	0.994024	0.993437	0.993286	0.993289
1510	0.991014	0.991509	0.991627	0.991282	0.994024	0.993437	0.993286	0.9933
1511	0.991014	0.991509	0.991638	0.991282	0.994024	0.993437	0.993286	0.9933
1512	0.991014	0.99152	0.991638	0.991282	0.994024	0.993437	0.993286	0.99331
1513	0.991025	0.99152	0.991638	0.991282	0.994024	0.993437	0.993286	0.99331
1514	0.991037	0.99152	0.991638	0.991282	0.994024	0.993448	0.993286	0.99331
1515	0.991037	0.991531	0.991649	0.991293	0.994024	0.993448	0.993296	0.993321
1516	0.991037	0.991531	0.991649	0.991293	0.994035	0.993458	0.993296	0.993321
1517	0.991037	0.991531	0.991649	0.991293	0.994035	0.993458	0.993307	0.993321
1518	0.991037	0.991531	0.991649	0.991293	0.994045	0.993458	0.993307	0.993321
1519	0.991037	0.991531	0.99166	0.991293	0.994045	0.993469	0.993307	0.993321
1520	0.991037	0.991531	0.99166	0.991293	0.994045	0.993469	0.993307	0.993331
1522	0.991037	0.991531	0.991681	0.991293	0.994045	0.993469	0.993307	0.993331
1523	0.991037	0.991531	0.991681	0.991304	0.994056	0.99349	0.993307	0.993331
1524	0.991048	0.991531	0.991692	0.991304	0.994056	0.99349	0.993307	0.993331
1525	0.991048	0.991531	0.991692	0.991316	0.994056	0.99349	0.993307	0.993331
1526	0.991048	0.991531	0.991692	0.991316	0.994056	0.993501	0.993307	0.993342
1527	0.991048	0.991542	0.991692	0.991327	0.994066	0.993501	0.993318	0.993352
1528	0.991048	0.991542	0.991692	0.991327	0.994087	0.993501	0.993318	0.993352
1529	0.991048	0.991553	0.991703	0.991327	0.994087	0.993501	0.993328	0.993352
1530	0.991048	0.991553	0.991714	0.991327	0.994098	0.993501	0.993328	0.993352
1531	0.991059	0.991553	0.991725	0.991327	0.994098	0.993501	0.993328	0.993352
1532	0.991059	0.991553	0.991725	0.991349	0.994098	0.993522	0.993328	0.993352
1534	0.99107	0.991563	0.991725	0.991349	0.994108	0.993543	0.993328	0.993352
1536	0.991081	0.991563	0.991725	0.99136	0.994108	0.993543	0.993328	0.993352
1537	0.991081	0.991563	0.991725	0.991371	0.994108	0.993543	0.993328	0.993352
1538	0.991081	0.991574	0.991725	0.991371	0.994119	0.993554	0.993328	0.993352
1539	0.991081	0.991574	0.991736	0.991371	0.994119	0.993554	0.993328	0.993352
1540	0.991081	0.991585	0.991736	0.991371	0.994119	0.993565	0.993328	0.993352
1541	0.991081	0.991585	0.991747	0.991371	0.99413	0.993565	0.993328	0.993352
1543	0.991081	0.991585	0.991758	0.991382	0.99413	0.993586	0.993328	0.993352
1544	0.991081	0.991585	0.991769	0.991382	0.99413	0.993597	0.993328	0.993352
1545	0.991081	0.991585	0.99178	0.991382	0.99414	0.993597	0.993328	0.993352
1546	0.991081	0.991585	0.99178	0.991382	0.99414	0.993597	0.993328	0.993363
1547	0.991081	0.991585	0.99178	0.991382	0.99414	0.993597	0.993339	0.993384
1548	0.991081	0.991585	0.991791	0.991382	0.99414	0.993597	0.993339	0.993395
1549	0.991125	0.991585	0.991802	0.991382	0.994151	0.993597	0.993339	0.993405
1550	0.991125	0.991596	0.991802	0.991382	0.994151	0.993607	0.993339	0.993405
1551	0.991136	0.991596	0.991802	0.991382	0.994161	0.993607	0.993339	0.993416
1552	0.991147	0.991607	0.991802	0.991404	0.994161	0.993607	0.993339	0.993416
1553	0.991169	0.991607	0.991802	0.991426	0.994161	0.993607	0.993339	0.993416
1554	0.991169	0.991629	0.991802	0.991426	0.994161	0.993607	0.993339	0.993416
1555	0.991169	0.991629	0.991802	0.991426	0.994161	0.993607	0.993339	0.993437
1556	0.991169	0.991629	0.991802	0.991426	0.994161	0.993607	0.993361	0.993437
1557	0.991181	0.991629	0.991802	0.991437	0.994182	0.993607	0.993361	0.993437
1558	0.991181	0.991629	0.991802	0.991437	0.994182	0.993607	0.993371	0.993437
1560	0.991181	0.99164	0.991813	0.991437	0.994182	0.993618	0.993371	0.993448
1561	0.991181	0.991673	0.991813	0.991437	0.994182	0.993618	0.993393	0.993448
1562	0.991181	0.991684	0.991813	0.991437	0.994182	0.993618	0.993414	0.993458
1563	0.991181	0.991684	0.991813	0.991448	0.994193	0.993639	0.993414	0.993458
1564	0.991181	0.991684	0.991813	0.991471	0.994193	0.99365	0.993414	0.993458
1565	0.991192	0.991684	0.991824	0.991482	0.994203	0.99365	0.993414	0.993458
1566	0.991203	0.991684	0.991824	0.991482	0.994203	0.99365	0.993414	0.993458
1567	0.991203	0.991695	0.991845	0.991482	0.994203	0.99365	0.993414	0.993469
1568	0.991203	0.991695	0.991845	0.991493	0.994203	0.99365	0.993414	0.993469
1569	0.991203	0.991695	0.991845	0.991493	0.994203	0.993682	0.993414	0.993469
1570	0.991203	0.991706	0.991845	0.991493	0.994203	0.993692	0.993425	0.993469
1571	0.991203	0.991717	0.991845	0.991493	0.994203	0.993692	0.993425	0.993469
1572	0.991203	0.991717	0.991845	0.991493	0.994203	0.993692	0.993436	0.993469
1573	0.991203	0.991717	0.991856	0.991504	0.994203	0.993703	0.993436	0.993469
1574	0.991203	0.991717	0.991856	0.991515	0.994214	0.993703	0.993436	0.993479
1575	0.991203	0.991717	0.991856	0.991526	0.994214	0.993713	0.993436	0.993479
1576	0.991203	0.991728	0.991867	0.991526	0.994235	0.993713	0.993436	0.993479
1577	0.991203	0.991739	0.991867	0.991526	0.994245	0.993713	0.993436	0.993479
1578	0.991214	0.991739	0.991878	0.991559	0.994256	0.993735	0.993436	0.993479
1579	0.991258	0.99176	0.991878	0.991559	0.994266	0.993735	0.993446	0.993479
1580	0.991258	0.99176	0.991889	0.991559	0.994266	0.993745	0.993446	0.993479
1581	0.991258	0.991771	0.9919	0.991559	0.994266	0.993756	0.993446	0.993479
1582	0.991269	0.991782	0.991911	0.991559	0.994277	0.993766	0.993457	0.99349
1583	0.991269	0.991782	0.991911	0.991559	0.994298	0.993777	0.993457	0.99349
1584	0.991269	0.991793	0.991911	0.991592	0.994298	0.993777	0.993457	0.99349
1585	0.991269	0.991804	0.991911	0.991604	0.994298	0.993798	0.993457	0.99349
1586	0.99128	0.991804	0.991911	0.991615	0.994308	0.993798	0.993457	0.993501
1587	0.99128	0.991826	0.991911	0.991615	0.994308	0.99382	0.993457	0.993501
1588	0.991291	0.991826	0.991911	0.991637	0.994319	0.99382	0.993457	0.993501
1589	0.991291	0.991826	0.991911	0.991648	0.994329	0.99382	0.993457	0.993501
1590	0.991291	0.991826	0.991911	0.991648	0.99434	0.99382	0.993457	0.993522
1591	0.991302	0.991826	0.991911	0.991648	0.99434	0.99382	0.993457	0.993522
1592	0.991302	0.991826	0.991922	0.991648	0.99435	0.99382	0.993468	0.993522
1593	0.991314	0.991826	0.991922	0.991659	0.994361	0.99383	0.993468	0.993543
1594	0.991325	0.991826	0.991933	0.99167	0.994372	0.99383	0.993478	0.993543
1595	0.991325	0.991826	0.991966	0.99167	0.994382	0.99383	0.993489	0.993543
1596	0.991325	0.991826	0.991966	0.991681	0.994382	0.99383	0.993489	0.993543
1597	0.991336	0.991826	0.991966	0.991681	0.994382	0.99383	0.993521	0.993543
1598	0.991336	0.991826	0.991987	0.991681	0.994382	0.99383	0.993521	0.993543
1599	0.991336	0.991837	0.991998	0.991692	0.994382	0.99383	0.993521	0.993543
1600	0.991347	0.991848	0.991998	0.991692	0.994382	0.993841	0.993532	0.993554
1601	0.991347	0.991848	0.991998	0.991714	0.994382	0.993841	0.993543	0.993554
1602	0.991347	0.991859	0.992009	0.991714	0.994382	0.993841	0.993543	0.993564
1603	0.991347	0.991859	0.992009	0.991725	0.994382	0.993841	0.993543	0.993564
1604	0.991347	0.99187	0.99202	0.991725	0.994382	0.993851	0.993543	0.993564
1605	0.991347	0.991881	0.992031	0.991725	0.994382	0.993851	0.993543	0.993564
1606	0.991358	0.991892	0.992042	0.991725	0.994382	0.993851	0.993543	0.993564
1607	0.991369	0.991892	0.992053	0.991736	0.994382	0.993851	0.993553	0.993564
1608	0.99138	0.991903	0.992064	0.991748	0.994382	0.993862	0.993553	0.993585
1609	0.99138	0.991903	0.992064	0.991748	0.994382	0.993883	0.993564	0.993585
1610	0.991391	0.991903	0.992075	0.991748	0.994382	0.993883	0.993564	0.993585
1611	0.991391	0.991903	0.992086	0.991748	0.994382	0.993894	0.993564	0.993585
1613	0.991402	0.991914	0.992086	0.991748	0.994382	0.993894	0.993575	0.993585
1614	0.991402	0.991914	0.992097	0.991748	0.994393	0.993894	0.993575	0.993585
1615	0.991413	0.991914	0.992097	0.991748	0.994414	0.993894	0.993585	0.993585
1617	0.991413	0.991914	0.992097	0.991748	0.994414	0.993894	0.993596	0.993585
1618	0.991424	0.991925	0.992097	0.991748	0.994414	0.993894	0.993607	0.993585
1619	0.991435	0.991925	0.992108	0.991748	0.994424	0.993894	0.993607	0.993585
1620	0.991446	0.991925	0.992108	0.991748	0.994424	0.993894	0.993607	0.993585
1621	0.991458	0.991935	0.992108	0.991748	0.994445	0.993894	0.993607	0.993596
1622	0.991458	0.991935	0.992108	0.991759	0.994445	0.993894	0.993607	0.993596
1623	0.991458	0.991935	0.992119	0.991759	0.994456	0.993894	0.993607	0.993596
1624	0.991458	0.991935	0.992119	0.991759	0.994456	0.993894	0.993618	0.993596
1625	0.991458	0.991935	0.992119	0.991759	0.994456	0.993894	0.993618	0.993607
1626	0.991458	0.991935	0.992119	0.991759	0.994466	0.993905	0.993618	0.993607
1628	0.991458	0.991935	0.992119	0.991759	0.994466	0.993905	0.993639	0.993607
1629	0.991458	0.991935	0.992141	0.991759	0.994466	0.993915	0.99365	0.993607
1630	0.991458	0.991935	0.992141	0.99177	0.994466	0.993915	0.99365	0.993617
1631	0.991458	0.991946	0.992141	0.991781	0.994477	0.993915	0.99365	0.993628
1632	0.991469	0.991946	0.992141	0.991781	0.994487	0.993915	0.99366	0.993638
1633	0.991469	0.991957	0.992151	0.991781	0.994498	0.993936	0.993671	0.993649
1634	0.991469	0.991979	0.992151	0.991781	0.994498	0.993936	0.993671	0.993649
1635	0.991469	0.991979	0.992162	0.991792	0.994498	0.993947	0.993671	0.993649
1636	0.991469	0.99199	0.992173	0.991792	0.994498	0.993958	0.993671	0.993649
1637	0.991469	0.99199	0.992173	0.991792	0.994508	0.993958	0.993671	0.993649
1638	0.99148	0.99199	0.992173	0.991792	0.994508	0.993958	0.993671	0.993649
1639	0.99148	0.992001	0.992184	0.991814	0.994508	0.993958	0.993671	0.993649
1640	0.99148	0.992001	0.992184	0.991825	0.994508	0.993968	0.993682	0.993649
1641	0.99148	0.992001	0.992206	0.991825	0.994508	0.993968	0.993682	0.993659
1642	0.991491	0.992001	0.992206	0.991825	0.994508	0.993968	0.993682	0.993659
1643	0.991513	0.992012	0.992206	0.991836	0.994508	0.993968	0.993682	0.993659
1644	0.991513	0.992012	0.992217	0.991836	0.994508	0.993979	0.993693	0.993659
1645	0.991513	0.992012	0.992217	0.991858	0.994508	0.993989	0.993714	0.99367
1646	0.991535	0.992034	0.992228	0.991858	0.994508	0.993989	0.993725	0.99367
1647	0.991535	0.992045	0.992228	0.991869	0.994508	0.993989	0.993746	0.99367
1648	0.991535	0.992045	0.992228	0.99188	0.994508	0.994	0.993746	0.99367
1650	0.991535	0.992067	0.992228	0.991892	0.994508	0.994	0.993757	0.993681
1651	0.991535	0.992067	0.992239	0.991892	0.994508	0.994011	0.993757	0.993681
1652	0.991535	0.992078	0.99225	0.991892	0.994508	0.994021	0.993757	0.993681
1653	0.991535	0.992078	0.99225	0.991903	0.994508	0.994032	0.993757	0.993702
1654	0.991535	0.992089	0.99225	0.991903	0.994508	0.994032	0.993768	0.993702
1655	0.991535	0.9921	0.99225	0.991903	0.994508	0.994032	0.993768	0.993702
1656	0.991535	0.992111	0.99225	0.991903	0.994508	0.994032	0.993768	0.993702
1657	0.991535	0.992122	0.992261	0.991903	0.994508	0.994032	0.993768	0.993702
1658	0.991535	0.992122	0.992261	0.991903	0.994508	0.994032	0.993768	0.993712
1659	0.991535	0.992122	0.992261	0.991914	0.994508	0.994043	0.993768	0.993712
1660	0.991535	0.992122	0.992261	0.991914	0.994508	0.994053	0.993768	0.993712
1661	0.991535	0.992122	0.992272	0.991914	0.994508	0.994053	0.993768	0.993712
1662	0.991535	0.992122	0.992283	0.991914	0.994508	0.994053	0.993768	0.993723
1663	0.991535	0.992122	0.992294	0.991914	0.994508	0.994053	0.993768	0.993723
1664	0.991535	0.992122	0.992294	0.991925	0.994508	0.994053	0.993789	0.993723
1665	0.991546	0.992122	0.992294	0.991925	0.994508	0.994053	0.9938	0.993734
1666	0.991546	0.992122	0.992304	0.991925	0.994508	0.994053	0.9938	0.993734
1667	0.991568	0.992122	0.992304	0.991925	0.994508	0.994053	0.9938	0.993734
1668	0.991568	0.992132	0.992304	0.991936	0.994508	0.994053	0.99381	0.993734
1670	0.991568	0.992132	0.992304	0.991936	0.994508	0.994064	0.993821	0.993744
1671	0.991579	0.992132	0.992304	0.991936	0.994519	0.994064	0.993832	0.993744
1672	0.991579	0.992132	0.992304	0.991936	0.994529	0.994064	0.993842	0.993765
1673	0.99159	0.992154	0.992315	0.991936	0.994529	0.994074	0.993842	0.993765
1674	0.99159	0.992154	0.992326	0.991936	0.994529	0.994074	0.993842	0.993765
1675	0.99159	0.992154	0.992326	0.991947	0.994529	0.994085	0.993853	0.993776
1676	0.99159	0.992154	0.992326	0.991947	0.994529	0.994085	0.993853	0.993786
1677	0.991602	0.992154	0.992326	0.991958	0.994529	0.994085	0.993853	0.993786
1678	0.991602	0.992165	0.992326	0.991958	0.994529	0.994096	0.993853	0.993786
1679	0.991602	0.992165	0.992326	0.991958	0.99454	0.994096	0.993864	0.993808
1680	0.991602	0.992165	0.992326	0.991969	0.99454	0.994106	0.993875	0.993818
1681	0.991602	0.992165	0.992326	0.991991	0.994561	0.994106	0.993875	0.993829
1682	0.991602	0.992176	0.992326	0.992024	0.994561	0.994106	0.993875	0.993829
1683	0.991602	0.992176	0.992326	0.992036	0.994561	0.994117	0.993875	0.993829
1684	0.991602	0.992176	0.992337	0.992036	0.994561	0.994117	0.993875	0.993829
1685	0.991602	0.992198	0.992337	0.992036	0.994561	0.994128	0.993875	0.993829
1686	0.991613	0.992209	0.992337	0.992036	0.994561	0.994128	0.993875	0.993829
1687	0.991613	0.992231	0.992337	0.992036	0.994571	0.994128	0.993875	0.993829
1688	0.991624	0.992231	0.992359	0.992036	0.994571	0.994128	0.993875	0.993829
1689	0.991635	0.992242	0.99237	0.992036	0.994571	0.994128	0.993875	0.993829
1690	0.991646	0.992242	0.992381	0.992036	0.994571	0.994149	0.993875	0.993829
1691	0.991679	0.992242	0.992381	0.992036	0.994571	0.994149	0.993875	0.993829
1692	0.991679	0.992242	0.992381	0.992047	0.994582	0.994149	0.993875	0.993829
1693	0.99169	0.992253	0.992381	0.992047	0.994582	0.994159	0.993885	0.993829
1694	0.99169	0.992253	0.992392	0.992047	0.994582	0.994159	0.993885	0.993829
1695	0.99169	0.992253	0.992392	0.992058	0.994582	0.99417	0.993885	0.993829
1696	0.99169	0.992253	0.992403	0.992058	0.994582	0.99417	0.993885	0.993829
1697	0.991712	0.992253	0.992403	0.992058	0.994592	0.994181	0.993885	0.993829
1698	0.991723	0.992264	0.992403	0.992058	0.994592	0.994181	0.993885	0.993829
1699	0.991723	0.992264	0.992403	0.992069	0.994592	0.994181	0.993896	0.99385
1700	0.991723	0.992275	0.992403	0.992069	0.994603	0.994181	0.993896	0.99385
1701	0.991723	0.992297	0.992414	0.992069	0.994603	0.994181	0.993907	0.99385
1702	0.991735	0.992308	0.992447	0.99208	0.994603	0.994181	0.993917	0.99385
1703	0.991735	0.992308	0.992447	0.99208	0.994603	0.994181	0.993917	0.993861
1704	0.991746	0.992308	0.992447	0.99208	0.994603	0.994181	0.993928	0.993871
1705	0.991746	0.992308	0.992447	0.992091	0.994603	0.994181	0.993928	0.993871
1706	0.991746	0.992318	0.992447	0.992091	0.994603	0.994191	0.993928	0.993871
1707	0.991746	0.992329	0.992447	0.992091	0.994613	0.994191	0.993928	0.993871
1709	0.991746	0.99234	0.992447	0.992091	0.994613	0.994191	0.993928	0.993882
1711	0.991757	0.992351	0.992447	0.992091	0.994613	0.994191	0.993928	0.993882
1712	0.991768	0.992351	0.992458	0.992091	0.994613	0.994191	0.993928	0.993903
1713	0.991779	0.992362	0.992458	0.992102	0.994613	0.994202	0.993939	0.993903
1714	0.991779	0.992362	0.992458	0.992102	0.994624	0.994202	0.99395	0.993903
1715	0.991779	0.992362	0.99249	0.992124	0.994624	0.994202	0.99395	0.993913
1716	0.991779	0.992362	0.992512	0.992124	0.994624	0.994212	0.99395	0.993913
1717	0.991779	0.992362	0.992523	0.992135	0.994624	0.994212	0.99395	0.993913
1718	0.991779	0.992362	0.992534	0.992135	0.994624	0.994212	0.993971	0.993913
1719	0.991779	0.992362	0.992556	0.992135	0.994635	0.994212	0.993971	0.993913
1720	0.991779	0.992373	0.992556	0.992146	0.994635	0.994212	0.993971	0.993924
1722	0.991779	0.992384	0.992556	0.992146	0.994635	0.994212	0.993971	0.993924
1723	0.991779	0.992384	0.992567	0.992146	0.994635	0.994212	0.993971	0.993935
1724	0.991779	0.992384	0.992567	0.992168	0.994635	0.994212	0.993971	0.993935
1726	0.99179	0.992384	0.992589	0.992168	0.994645	0.994212	0.993971	0.993935
1727	0.99179	0.992395	0.9926	0.992168	0.994645	0.994212	0.993971	0.993945
1728	0.99179	0.992406	0.992611	0.99218	0.994645	0.994212	0.993971	0.993945
1729	0.99179	0.992406	0.992611	0.99218	0.994645	0.994212	0.993971	0.993966
1730	0.99179	0.992406	0.992621	0.99218	0.994645	0.994212	0.993971	0.993966
1731	0.99179	0.992417	0.992621	0.992191	0.994645	0.994223	0.993982	0.993977
1732	0.991801	0.992417	0.992621	0.992191	0.994645	0.994234	0.993982	0.993977
1733	0.991801	0.992428	0.992621	0.992191	0.994645	0.994234	0.993982	0.993977
1734	0.991812	0.992439	0.992621	0.992191	0.994645	0.994234	0.993982	0.993977
1735	0.991823	0.992461	0.992621	0.992202	0.994645	0.994234	0.993982	0.993977
1736	0.991823	0.992461	0.992632	0.992202	0.994656	0.994244	0.993982	0.993977
1738	0.991823	0.992461	0.992654	0.992202	0.994656	0.994244	0.993982	0.993988
1739	0.991823	0.992483	0.992665	0.992202	0.994656	0.994266	0.993982	0.994009
1741	0.991834	0.992494	0.992665	0.992202	0.994656	0.994266	0.993982	0.994009
1742	0.991845	0.992494	0.992665	0.992202	0.994656	0.994276	0.993982	0.994009
1743	0.991845	0.992494	0.992665	0.992202	0.994656	0.994287	0.993982	0.994009
1744	0.991856	0.992494	0.992676	0.992202	0.994656	0.994297	0.993982	0.99403
1745	0.991856	0.992494	0.992687	0.992202	0.994656	0.994308	0.993992	0.99403
1746	0.991856	0.992494	0.992687	0.992202	0.994656	0.994308	0.994003	0.99404
1747	0.991856	0.992494	0.992687	0.992213	0.994656	0.994319	0.994003	0.99404
1748	0.991879	0.992504	0.992698	0.992213	0.994656	0.994319	0.994003	0.99404
1749	0.991879	0.992504	0.992709	0.992213	0.994656	0.994319	0.994003	0.99404
1750	0.99189	0.992504	0.99272	0.992213	0.994656	0.994319	0.994003	0.99404
1752	0.991912	0.992504	0.99272	0.992213	0.994656	0.994319	0.994003	0.994062
1753	0.991923	0.992515	0.99272	0.992213	0.994656	0.994319	0.994003	0.994062
1754	0.991934	0.992515	0.99272	0.992213	0.994656	0.994319	0.994003	0.994062
1755	0.991934	0.992515	0.992731	0.992213	0.994656	0.994319	0.994003	0.994062
1756	0.991934	0.992515	0.992731	0.992213	0.994656	0.994329	0.994014	0.994062
1757	0.991934	0.992515	0.992731	0.992224	0.994656	0.994329	0.994014	0.994062
1758	0.991934	0.992515	0.992742	0.992224	0.994656	0.994329	0.994014	0.994062
1759	0.991934	0.992526	0.992742	0.992224	0.994656	0.994329	0.994025	0.994062
1760	0.991934	0.992526	0.992742	0.992224	0.994656	0.994329	0.994025	0.994072
1761	0.991945	0.992526	0.992742	0.992224	0.994656	0.99434	0.994025	0.994072
1762	0.991945	0.992526	0.992753	0.992224	0.994656	0.99434	0.994025	0.994072
1763	0.991956	0.992526	0.992753	0.992224	0.994656	0.99434	0.994035	0.994072
1764	0.991956	0.992526	0.992764	0.992224	0.994666	0.99434	0.994035	0.994072
1765	0.991967	0.992537	0.992764	0.992224	0.994677	0.994351	0.994035	0.994072
1767	0.991967	0.992537	0.992764	0.992246	0.994687	0.994351	0.994046	0.994072
1769	0.991967	0.992537	0.992775	0.992246	0.994698	0.994351	0.994046	0.994072
1770	0.991978	0.992537	0.992775	0.992246	0.994698	0.994351	0.994046	0.994072
1771	0.991989	0.992537	0.992785	0.992246	0.994698	0.994351	0.994046	0.994072
1772	0.992	0.992537	0.992785	0.992246	0.994698	0.994351	0.994046	0.994083
1774	0.992	0.992537	0.992785	0.992246	0.994698	0.994351	0.994046	0.994093
1775	0.992	0.992548	0.992785	0.992268	0.994698	0.994351	0.994046	0.994104
1776	0.992012	0.992559	0.992785	0.992279	0.994698	0.994361	0.994046	0.994104
1777	0.992012	0.992559	0.992785	0.992279	0.994708	0.994372	0.994046	0.994104
1778	0.992012	0.992559	0.992785	0.992279	0.994719	0.994372	0.994046	0.994104
1779	0.992023	0.992559	0.992785	0.992279	0.994719	0.994372	0.994046	0.994104
1780	0.992023	0.992559	0.992785	0.992279	0.994729	0.994382	0.994046	0.994104
1781	0.992023	0.992559	0.992785	0.992279	0.994729	0.994393	0.994057	0.994104
1782	0.992034	0.992559	0.992785	0.992279	0.994729	0.994393	0.994078	0.994104
1783	0.992034	0.992559	0.992785	0.992279	0.99474	0.994393	0.994089	0.994104
1784	0.992034	0.992559	0.992796	0.992279	0.99474	0.994404	0.994089	0.994104
1785	0.992045	0.992559	0.992796	0.992279	0.99474	0.994404	0.994089	0.994104
1786	0.992045	0.992559	0.992796	0.992279	0.99474	0.994404	0.994089	0.994115
1787	0.992056	0.992581	0.992796	0.99229	0.99474	0.994414	0.994089	0.994115
1788	0.992056	0.992581	0.992796	0.992301	0.99474	0.994425	0.994089	0.994115
1789	0.992067	0.992581	0.992807	0.992312	0.99474	0.994425	0.994089	0.994115
1790	0.992067	0.992592	0.992807	0.992324	0.99474	0.994425	0.994089	0.994125
1791	0.992067	0.992614	0.992818	0.992324	0.99474	0.994425	0.9941	0.994125
1792	0.992067	0.992614	0.992818	0.992324	0.99474	0.994425	0.9941	0.994136
1793	0.992067	0.992625	0.992818	0.992324	0.99474	0.994425	0.9941	0.994136
1794	0.992067	0.992636	0.992829	0.992335	0.99474	0.994425	0.9941	0.994136
1795	0.992067	0.992636	0.992829	0.992335	0.99475	0.994435	0.99411	0.994136
1796	0.992067	0.992636	0.992829	0.992335	0.99475	0.994446	0.994121	0.994136
1797	0.992067	0.992636	0.992829	0.992346	0.994761	0.994446	0.994121	0.994146
1799	0.992078	0.992636	0.992829	0.992346	0.994782	0.994446	0.994121	0.994146
1800	0.992078	0.992636	0.99284	0.992346	0.994782	0.994446	0.994121	0.994168
1801	0.992089	0.992636	0.99284	0.992357	0.994782	0.994446	0.994121	0.994168
1802	0.992089	0.992636	0.992851	0.992357	0.994782	0.994457	0.994121	0.994168
1803	0.992089	0.992647	0.992851	0.992357	0.994782	0.994457	0.994121	0.994168
1804	0.992089	0.992647	0.992851	0.992357	0.994782	0.994457	0.994121	0.994178
1805	0.9921	0.992647	0.992851	0.992357	0.994792	0.994457	0.994121	0.994189
1806	0.9921	0.992647	0.992862	0.992368	0.994803	0.994457	0.994121	0.994199
1807	0.9921	0.992658	0.992862	0.992368	0.994813	0.994467	0.994132	0.994199
1808	0.992111	0.992658	0.992862	0.992368	0.994834	0.994467	0.994132	0.994199
1809	0.992111	0.992658	0.992862	0.992368	0.994834	0.994467	0.994142	0.994199
1810	0.992111	0.992658	0.992873	0.992379	0.994834	0.994467	0.994142	0.994199
1811	0.992111	0.992658	0.992873	0.99239	0.994834	0.994467	0.994142	0.99421
1812	0.992111	0.992658	0.992873	0.992401	0.994845	0.994467	0.994142	0.99421
1813	0.992111	0.992669	0.992873	0.992401	0.994855	0.994467	0.994142	0.99422
1814	0.992111	0.992669	0.992873	0.992412	0.994855	0.994467	0.994142	0.994231
1815	0.992111	0.992691	0.992873	0.992412	0.994855	0.994467	0.994142	0.994242
1817	0.992111	0.992691	0.992884	0.992423	0.994855	0.994467	0.994142	0.994242
1818	0.992111	0.992691	0.992884	0.992423	0.994866	0.994478	0.994142	0.994242
1819	0.992111	0.992701	0.992884	0.992423	0.994866	0.994478	0.994142	0.994242
1820	0.992122	0.992701	0.992884	0.992423	0.994866	0.994478	0.994164	0.994242
1821	0.992122	0.992701	0.992884	0.992423	0.994866	0.994489	0.994164	0.994242
1822	0.992122	0.992701	0.992884	0.992434	0.994866	0.994499	0.994174	0.994242
1823	0.992133	0.992701	0.992884	0.992434	0.994866	0.99451	0.994174	0.994242
1824	0.992133	0.992701	0.992895	0.992434	0.994876	0.99451	0.994185	0.994242
1825	0.992133	0.992712	0.992917	0.992445	0.994876	0.99451	0.994196	0.994242
1828	0.992133	0.992712	0.992917	0.992445	0.994876	0.99451	0.994207	0.994242
1829	0.992133	0.992712	0.992917	0.992445	0.994887	0.99451	0.994207	0.994242
1830	0.992133	0.992712	0.992928	0.992456	0.994887	0.99451	0.994207	0.994263
1831	0.992133	0.992712	0.992939	0.992468	0.994898	0.994531	0.994217	0.994263
1832	0.992133	0.992723	0.992939	0.992468	0.994898	0.994531	0.994217	0.994273
1833	0.992133	0.992723	0.992939	0.992479	0.994898	0.994542	0.994217	0.994273
1834	0.992133	0.992734	0.992949	0.992479	0.994898	0.994542	0.994217	0.994284
1836	0.992133	0.992745	0.992949	0.992479	0.994898	0.994552	0.994217	0.994284
1837	0.992144	0.992756	0.992949	0.99249	0.994898	0.994563	0.994217	0.994284
1838	0.992144	0.992756	0.99296	0.99249	0.994898	0.994574	0.994217	0.994284
1839	0.992144	0.992756	0.99296	0.992501	0.994898	0.994574	0.994217	0.994284
1840	0.992144	0.992756	0.992971	0.992501	0.994898	0.994584	0.994217	0.994295
1841	0.992144	0.992756	0.992971	0.992512	0.994898	0.994584	0.994217	0.994305
1842	0.992144	0.992756	0.992971	0.992523	0.994898	0.994584	0.994217	0.994305
1844	0.992156	0.992756	0.992982	0.992523	0.994898	0.994584	0.994217	0.994305
1845	0.992156	0.992756	0.992982	0.992523	0.994908	0.994584	0.994217	0.994305
1847	0.992156	0.992756	0.992982	0.992523	0.994919	0.994584	0.994217	0.994326
1848	0.992156	0.992756	0.992982	0.992523	0.994919	0.994584	0.994217	0.994337
1849	0.992178	0.992767	0.992993	0.992523	0.994929	0.994584	0.994217	0.994347
1850	0.992178	0.992767	0.992993	0.992534	0.994929	0.994584	0.994228	0.994358
1851	0.992178	0.992767	0.992993	0.992545	0.994929	0.994584	0.994228	0.994358
1853	0.992189	0.992767	0.992993	0.992556	0.994929	0.994584	0.994228	0.994358
1854	0.9922	0.992767	0.992993	0.992578	0.994929	0.994584	0.994228	0.994358
1856	0.992211	0.992767	0.992993	0.992578	0.994929	0.994584	0.994228	0.994358
1857	0.992211	0.992778	0.992993	0.992578	0.994929	0.994595	0.994228	0.994358
1859	0.992211	0.992778	0.992993	0.992589	0.994929	0.994605	0.994228	0.994358
1860	0.992211	0.992789	0.992993	0.992589	0.99494	0.994605	0.994239	0.994358
1861	0.992222	0.992789	0.992993	0.992589	0.99495	0.994605	0.994239	0.994369
1862	0.992222	0.992789	0.992993	0.992589	0.994961	0.994605	0.994239	0.994369
1863	0.992233	0.992811	0.993004	0.992589	0.994961	0.994605	0.994249	0.994369
1864	0.992233	0.992822	0.993026	0.992589	0.994961	0.994627	0.994249	0.994369
1865	0.992233	0.992822	0.993026	0.992589	0.994971	0.994627	0.994249	0.994369
1866	0.992233	0.992822	0.993037	0.992589	0.994971	0.994627	0.99426	0.994369
1867	0.992233	0.992822	0.993037	0.992589	0.994971	0.994627	0.994271	0.994369
1868	0.992233	0.992833	0.993037	0.992589	0.994971	0.994627	0.994282	0.994369
1869	0.992233	0.992833	0.993059	0.992589	0.994971	0.994627	0.994282	0.994379
1870	0.992233	0.992833	0.993059	0.992589	0.994982	0.994627	0.994282	0.994379
1872	0.992233	0.992833	0.993059	0.9926	0.994982	0.994648	0.994282	0.994379
1873	0.992233	0.992833	0.993059	0.9926	0.994982	0.994648	0.994282	0.99439
1874	0.992233	0.992855	0.993059	0.992612	0.994982	0.994658	0.994282	0.99439
1875	0.992233	0.992855	0.993059	0.992612	0.994982	0.994658	0.994292	0.994411
1876	0.992233	0.992866	0.99307	0.992612	0.994982	0.994658	0.994292	0.994422
1877	0.992244	0.992877	0.99307	0.992612	0.994982	0.994658	0.994292	0.994422
1878	0.992244	0.992887	0.99307	0.992612	0.994992	0.994658	0.994303	0.994432
1881	0.992244	0.992898	0.993081	0.992612	0.994992	0.994658	0.994314	0.994432
1882	0.992244	0.992898	0.993092	0.992612	0.994992	0.994658	0.994314	0.994432
1883	0.992255	0.992898	0.993092	0.992612	0.994992	0.994658	0.994314	0.994443
1884	0.992255	0.992898	0.993092	0.992612	0.994992	0.994669	0.994314	0.994443
1885	0.992255	0.992909	0.993092	0.992612	0.995003	0.994669	0.994314	0.994443
1886	0.992255	0.992909	0.993113	0.992612	0.995003	0.99468	0.994324	0.994443
1887	0.992255	0.992909	0.993113	0.992623	0.995003	0.99468	0.994335	0.994443
1888	0.992255	0.992909	0.993124	0.992623	0.995003	0.99468	0.994335	0.994443
1889	0.992266	0.992909	0.993124	0.992623	0.995003	0.99468	0.994335	0.994443
1890	0.992266	0.992909	0.993124	0.992623	0.995003	0.99469	0.994335	0.994443
1891	0.992266	0.992909	0.993124	0.992634	0.995013	0.99469	0.994335	0.994464
1892	0.992277	0.992909	0.993124	0.992634	0.995013	0.994701	0.994335	0.994464
1894	0.992277	0.992909	0.993135	0.992634	0.995013	0.994701	0.994346	0.994464
1895	0.992277	0.992909	0.993135	0.992634	0.995024	0.994701	0.994367	0.994464
1896	0.992277	0.992909	0.993146	0.992634	0.995024	0.994701	0.994367	0.994464
1897	0.992277	0.992909	0.993146	0.992634	0.995034	0.994701	0.994367	0.994464
1898	0.992277	0.992909	0.993146	0.992645	0.995034	0.994712	0.994367	0.994464
1899	0.992289	0.99292	0.993146	0.992645	0.995034	0.994712	0.994367	0.994464
1900	0.992289	0.99292	0.993146	0.992645	0.995034	0.994712	0.994378	0.994474
1901	0.992289	0.992931	0.993157	0.992645	0.995034	0.994712	0.994399	0.994474
1904	0.9923	0.992931	0.993168	0.992667	0.995045	0.994712	0.994399	0.994485
1905	0.9923	0.992931	0.993168	0.992667	0.995055	0.994712	0.994399	0.994496
1906	0.9923	0.992942	0.993168	0.992678	0.995055	0.994712	0.99441	0.994506
1907	0.9923	0.992942	0.993168	0.992678	0.995066	0.994712	0.99441	0.994506
1908	0.992311	0.992942	0.993168	0.992678	0.995066	0.994712	0.99441	0.994506
1909	0.992311	0.992942	0.993168	0.992689	0.995066	0.994712	0.99441	0.994506
1910	0.992322	0.992953	0.993179	0.992689	0.995066	0.994712	0.99441	0.994506
1911	0.992322	0.992953	0.993201	0.992689	0.995087	0.994712	0.99441	0.994506
1912	0.992333	0.992953	0.993201	0.992711	0.995087	0.994722	0.994421	0.994517
1913	0.992333	0.992953	0.993201	0.992711	0.995087	0.994722	0.994431	0.994527
1914	0.992355	0.992953	0.993223	0.992711	0.995087	0.994722	0.994442	0.994527
1915	0.992366	0.992953	0.993234	0.992711	0.995087	0.994722	0.994442	0.994527
1916	0.992366	0.992953	0.993245	0.992711	0.995087	0.994722	0.994453	0.994538
1917	0.992366	0.992953	0.993256	0.992733	0.995087	0.994722	0.994453	0.994549
1918	0.992366	0.992953	0.993256	0.992733	0.995087	0.994722	0.994453	0.99457
1919	0.992366	0.992964	0.993256	0.992733	0.995097	0.994722	0.994453	0.99457
1920	0.992377	0.992964	0.993266	0.992733	0.995097	0.994722	0.994464	0.99457
1921	0.992377	0.992964	0.993277	0.992744	0.995097	0.994722	0.994464	0.99457
1922	0.992377	0.992964	0.993277	0.992744	0.995108	0.994722	0.994464	0.99458
1923	0.992377	0.992964	0.993288	0.992756	0.995118	0.994722	0.994464	0.99458
1924	0.992377	0.992964	0.993288	0.992767	0.995129	0.994722	0.994464	0.99458
1925	0.992388	0.992964	0.993288	0.992778	0.99514	0.994722	0.994464	0.99458
1926	0.99241	0.992975	0.993288	0.992778	0.99514	0.994722	0.994474	0.99458
1927	0.99241	0.992997	0.993299	0.992778	0.995161	0.994722	0.994474	0.99458
1928	0.99241	0.993008	0.99331	0.992778	0.995161	0.994722	0.994474	0.99458
1929	0.99241	0.993008	0.99331	0.992778	0.995171	0.994722	0.994474	0.994591
1930	0.992421	0.993008	0.99331	0.992778	0.995171	0.994733	0.994474	0.994591
1931	0.992421	0.993008	0.993321	0.992778	0.995171	0.994733	0.994474	0.994591
1932	0.992421	0.993008	0.993321	0.992778	0.995171	0.994733	0.994474	0.994602
1933	0.992433	0.993008	0.993321	0.992778	0.995182	0.994743	0.994474	0.994602
1934	0.992433	0.993008	0.993321	0.992789	0.995182	0.994743	0.994485	0.994602
1935	0.992433	0.993008	0.993332	0.992789	0.995182	0.994754	0.994485	0.994602
1936	0.992433	0.993008	0.993343	0.992789	0.995182	0.994754	0.994485	0.994602
1937	0.992433	0.993008	0.993343	0.992789	0.995182	0.994765	0.994496	0.994623
1938	0.992433	0.993019	0.993343	0.992789	0.995182	0.994765	0.994496	0.994623
1939	0.992433	0.99303	0.993343	0.992789	0.995203	0.994786	0.994496	0.994623
1941	0.992433	0.99303	0.993343	0.9928	0.995203	0.994786	0.994496	0.994623
1942	0.992433	0.99303	0.993354	0.9928	0.995213	0.994786	0.994496	0.994623
1944	0.992433	0.99303	0.993365	0.9928	0.995224	0.994786	0.994496	0.994623
1945	0.992433	0.993041	0.993365	0.9928	0.995234	0.994797	0.994506	0.994623
1946	0.992433	0.993041	0.993387	0.9928	0.995245	0.994797	0.994506	0.994623
1947	0.992433	0.993052	0.993387	0.9928	0.995245	0.994797	0.994506	0.994623
1948	0.992433	0.993052	0.993387	0.992811	0.995245	0.994807	0.994506	0.994633
1949	0.992433	0.993052	0.993398	0.992811	0.995245	0.994807	0.994506	0.994633
1950	0.992433	0.993052	0.993398	0.992822	0.995245	0.994818	0.994506	0.994633
1951	0.992433	0.993052	0.993398	0.992822	0.995245	0.994828	0.994506	0.994644
1952	0.992444	0.993052	0.993398	0.992822	0.995245	0.994828	0.994506	0.994644
1953	0.992444	0.993073	0.993409	0.992822	0.995245	0.994839	0.994506	0.994644
1954	0.992444	0.993073	0.993419	0.992833	0.995245	0.994839	0.994506	0.994644
1955	0.992444	0.993073	0.993441	0.992844	0.995245	0.994839	0.994506	0.994644
1956	0.992444	0.993073	0.993452	0.992844	0.995245	0.994839	0.994506	0.994644
1957	0.992455	0.993073	0.993452	0.992844	0.995245	0.994839	0.994506	0.994644
1958	0.992455	0.993073	0.993452	0.992844	0.995245	0.994839	0.994517	0.994654
1959	0.992455	0.993073	0.993452	0.992855	0.995255	0.994839	0.994517	0.994665
1961	0.992455	0.993084	0.993452	0.992855	0.995255	0.994839	0.994517	0.994665
1963	0.992455	0.993084	0.993452	0.992855	0.995255	0.994839	0.994517	0.994676
1964	0.992477	0.993084	0.993452	0.992855	0.995255	0.994839	0.994517	0.994676
1965	0.992477	0.993084	0.993452	0.992855	0.995266	0.994839	0.994517	0.994676
1966	0.992477	0.993084	0.993452	0.992855	0.995266	0.994839	0.994517	0.994686
1968	0.992477	0.993084	0.993452	0.992866	0.995266	0.994839	0.994517	0.994686
1969	0.992477	0.993095	0.993452	0.992866	0.995276	0.99485	0.994517	0.994686
1970	0.992477	0.993095	0.993452	0.992877	0.995287	0.99485	0.994517	0.994697
1971	0.992499	0.993106	0.993452	0.992877	0.995287	0.99485	0.994517	0.994707
1973	0.99251	0.993106	0.993452	0.992888	0.995287	0.99486	0.994517	0.994707
1974	0.99251	0.993106	0.993452	0.992888	0.995287	0.99486	0.994528	0.994707
1975	0.992521	0.993106	0.993452	0.992888	0.995287	0.99486	0.994539	0.994707
1976	0.992521	0.993117	0.993452	0.992888	0.995287	0.994871	0.994539	0.994707
1977	0.992532	0.993117	0.993452	0.992888	0.995287	0.994871	0.994539	0.994707
1978	0.992543	0.993128	0.993452	0.9929	0.995287	0.994871	0.994539	0.994718
1979	0.992554	0.993128	0.993463	0.9929	0.995287	0.994871	0.994549	0.994729
1980	0.992554	0.993128	0.993463	0.9929	0.995297	0.994871	0.994549	0.994729
1981	0.992566	0.993128	0.993463	0.9929	0.995308	0.994871	0.99456	0.994729
1983	0.992566	0.993128	0.993463	0.9929	0.995318	0.994871	0.99456	0.994729
1984	0.992566	0.993128	0.993463	0.9929	0.995329	0.994871	0.99456	0.994729
1986	0.992577	0.993128	0.993463	0.9929	0.995329	0.994871	0.99456	0.994729
1987	0.992588	0.993128	0.993474	0.9929	0.995329	0.994871	0.99456	0.994729
1989	0.992599	0.993139	0.993474	0.9929	0.995329	0.994871	0.99456	0.994729
1990	0.992599	0.99315	0.993474	0.992922	0.995329	0.994871	0.99456	0.994739
1991	0.992599	0.993161	0.993474	0.992922	0.995329	0.994871	0.99456	0.994739
1992	0.99261	0.993161	0.993474	0.992933	0.995329	0.994881	0.994571	0.99476
1993	0.99261	0.993172	0.993474	0.992933	0.995329	0.994881	0.994571	0.99476
1994	0.992621	0.993172	0.993474	0.992933	0.995329	0.994881	0.994571	0.99476
1995	0.992643	0.993172	0.993474	0.992933	0.995329	0.994881	0.994581	0.99476
1996	0.992643	0.993172	0.993485	0.992944	0.995329	0.994881	0.994581	0.99476
1997	0.992643	0.993172	0.993485	0.992955	0.995329	0.994881	0.994581	0.994771
1998	0.992643	0.993172	0.993496	0.992955	0.995329	0.994892	0.994581	0.994781
1999	0.992643	0.993172	0.993496	0.992955	0.995329	0.994903	0.994581	0.994792
2001	0.992654	0.993172	0.993496	0.992955	0.995339	0.994913	0.994592	0.994792
2003	0.992654	0.993172	0.993507	0.992955	0.995339	0.994913	0.994592	0.994792
2005	0.992654	0.993172	0.993507	0.992955	0.995339	0.994913	0.994592	0.994803
2007	0.992654	0.993172	0.993507	0.992955	0.995339	0.994913	0.994603	0.994803
2008	0.992654	0.993172	0.993507	0.992966	0.995339	0.994913	0.994603	0.994803
2009	0.992654	0.993172	0.993507	0.992977	0.995339	0.994913	0.994614	0.994803
2010	0.992654	0.993172	0.993507	0.992988	0.995339	0.994924	0.994614	0.994803
2012	0.992654	0.993172	0.993518	0.992988	0.995339	0.994924	0.994614	0.994803
2013	0.992665	0.993172	0.993518	0.992988	0.995339	0.994924	0.994614	0.994803
2014	0.992665	0.993172	0.993518	0.992999	0.995339	0.994924	0.994614	0.994803
2015	0.992676	0.993172	0.99354	0.992999	0.99535	0.994935	0.994614	0.994803
2017	0.992687	0.993172	0.99354	0.992999	0.99535	0.994935	0.994614	0.994803
2018	0.992687	0.993172	0.99354	0.99301	0.99536	0.994935	0.994614	0.994803
2019	0.992687	0.993172	0.99354	0.99301	0.99536	0.994935	0.994624	0.994803
2021	0.992698	0.993183	0.99354	0.99301	0.99536	0.994935	0.994624	0.994803
2022	0.992698	0.993183	0.99354	0.99301	0.99536	0.994935	0.994624	0.994813
2023	0.992698	0.993194	0.99354	0.99301	0.99536	0.994935	0.994624	0.994813
2024	0.992698	0.993205	0.99354	0.99301	0.99536	0.994935	0.994624	0.994813
2025	0.99271	0.993205	0.993562	0.99301	0.99536	0.994945	0.994635	0.994813
2027	0.99271	0.993216	0.993562	0.99301	0.99536	0.994945	0.994635	0.994813
2028	0.99271	0.993216	0.993562	0.99301	0.99536	0.994956	0.994635	0.994813
2029	0.99271	0.993216	0.993573	0.99301	0.99536	0.994956	0.994635	0.994813
2030	0.992721	0.993216	0.993573	0.99301	0.99536	0.994956	0.994635	0.994813
2031	0.992721	0.993216	0.993573	0.99301	0.99536	0.994956	0.994635	0.994824
2032	0.992721	0.993216	0.993573	0.99301	0.995371	0.994956	0.994646	0.994824
2033	0.992732	0.993216	0.993573	0.99301	0.995371	0.994956	0.994646	0.994824
2034	0.992732	0.993216	0.993573	0.993021	0.995371	0.994956	0.994646	0.994824
[truncated: 3,262 more rows]
